# Supplementary material for: Copper-catalyzed ortho-selective direct sulfenylation of N-aryl-7-azaindoles with disulfides
Source: Royal Society of Chemistry journal article supplement (doi:10.1039/d1ob00106j), 2021-01-01

# **Copper-Catalyzed *ortho*-selective direct sulfenylation of *N*-aryl- 7-azaindoles with Disulfides**

Ru-Jian. Yu,<sup>a</sup> Chun-Yan. Zhang,<sup>a</sup> Xiang Zhou,<sup>a</sup> Yan-Shi. Xiong,<sup>a\*</sup> and Xue-Min. Duan<sup>a\*</sup>

<sup>a</sup> Jiangxi Provincial Key Laboratory of Drug Design and Evaluation, School of Pharmacy, Jiangxi  
Science & Technology Normal University, Nanchang, 330013, Jiangxi, P. R. China.

E-mail: xiongys1214@163.com or duanxuemin@126.com

## **Table of Contents**

|                                                                                              |            |
|----------------------------------------------------------------------------------------------|------------|
| <b>1. General Information</b>                                                                | <b>S2</b>  |
| <b>2. Experimental Section</b>                                                               | <b>S2</b>  |
| <b>2.1 Preparation of substrate</b>                                                          | <b>S2</b>  |
| <b>2.2 Optimization of Reaction Condition</b>                                                | <b>S3</b>  |
| <b>2.3 General Procedures for the Thiolation</b>                                             | <b>S4</b>  |
| <b>2.4 Mechanism Investigation</b>                                                           | <b>S15</b> |
| <b>3. Reference</b>                                                                          | <b>S16</b> |
| <b>4. Copies of <sup>1</sup>H, <sup>13</sup>C and <sup>19</sup>F NMR spectra of products</b> | <b>S17</b> |

## 1. General information

**Reagents and solvents.** All starting materials, which were purchased from commercial sources, were used without further purification. Solvents for column chromatography were technical standard. Column chromatography was performed with silica gel 200-400 mesh.  $^1\text{H}$ ,  $^{13}\text{C}$  and  $^{19}\text{F}$  NMR spectra were recorded on Bruker Avance 400 Mhz or 500 Mhz spectrometer. Chemical shifts in  $^1\text{H}$  NMR spectra were reported in parts per million (ppm) downfield from the internal standard  $\text{Me}_4\text{Si}$  (TMS). Chemical shifts in  $^{13}\text{C}$  NMR spectra were reported relative to the central line of the chloroform signal ( $\delta = 77.0$  ppm). Peaks were labelled as singlet (s), doublet (d), triplet (t), quarter (q), and multiplet (m). High resolution mass spectra were obtained with a Shimadzu LCMS-IT-TOF mass spectrometer. Analytical TLC was performed using EM separations percolated silica gel 0.2 mm layer UV 254 fluorescent sheets.

### 2.1 Synthesis of starting materials

#### General procedure (A) for the synthesis of *N*-aryl-7-azaindoles (1a-1ai)<sup>1</sup>

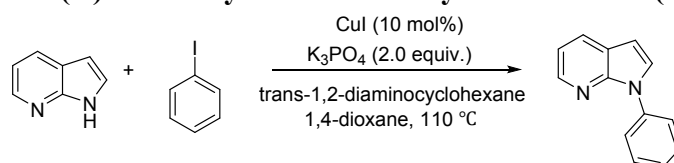

To a mixture of 7-azaindole (423 mg, 3.58 mmol), copper iodide (5.7 mg, 0.03 mmol) and potassium phosphate (1.33 g, 6.29 mmol) under a  $\text{N}_2$  atmosphere is added racemic *trans*-1,2-diaminocyclohexane (0.035 mL, 0.3 mmol), iodobenzene (0.335 mL, 3 mmol) followed by anhydrous dioxane (5 mL). The resulting suspension is heated in an oil bath at  $110\text{ }^\circ\text{C}$ . with magnetic stirring for 12 hours. The resulting mixture is filtered through a short pad of silica gel, washing the cake well with ethyl acetate. The filtrate is evaporated to leave a brown oil. and further purified by flash

chromatography on a 10-gram silica gel cartridge by elution with heptane:ethyl acetate (20:1). Clean fractions containing the product are combined and evaporated to give 1-phenyl-7-azaindole as a light brown oil.

### General procedure (B) for the synthesis of disulfides 2<sup>2</sup>

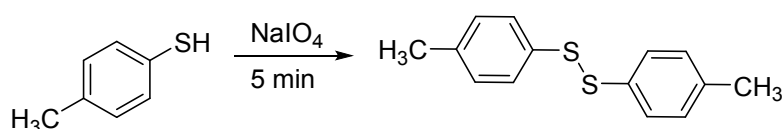

To a mixture of *p*-toluenethiol (620 mg, 5 mol) and NaIO<sub>4</sub> (1.06 g, 5 mol), the mixture was grind for 5 minutes, the reaction mixture was then diluted with water and extracted with ethyl acetate. After the combined organic layers were washed with brine, dried over Na<sub>2</sub>SO<sub>4</sub>, and concentrated under reduced pressure, the residue was purified by flash column chromatography on silica gel using petroleum ether to afford the pure product **2**.

## 2.2 Optimization of Reaction Condition

**Table S1. Screening of catalyst<sup>a</sup>**

| Entry    | Cat.                       | Solvent    | Temp.(°C)  | Yield(%) <sup>b</sup> |
|----------|----------------------------|------------|------------|-----------------------|
| 1        | CuCl                       | DCE        | 120        | <5                    |
| 2        | CuBr                       | DCE        | 120        | --                    |
| 3        | CuI                        | DCE        | 120        | --                    |
| 4        | CuCl <sub>2</sub>          | DCE        | 120        | 13                    |
| 5        | CuBr <sub>2</sub>          | DCE        | 120        | 34                    |
| <b>6</b> | <b>Cu(OAc)<sub>2</sub></b> | <b>DCE</b> | <b>120</b> | <b>50</b>             |
| 7        | Cu(OTf) <sub>2</sub>       | DCE        | 120        | --                    |
| 8        | Pd(OAc) <sub>2</sub>       | DCE        | 120        | --                    |
| 9        | Ni(OAc) <sub>2</sub>       | DCE        | 120        | --                    |
| 10       | Co(OAc) <sub>2</sub>       | DCE        | 120        | --                    |

<sup>a</sup> Reactions were carried out by using **1a** (0.1 mmol), **2a** (0.15 mmol), metal catalyst (0.02 mmol) and DCE (1 mL) stirred at 120 °C for 12 h.<sup>b</sup> Isolated yields.

**Table S2. Screening of solvent<sup>a</sup>**

Cc1c[nH]c2ccccc12 + c1ccc(cc1)SSc2ccccc2  $\xrightarrow[\text{Solvent, 120 } ^\circ\text{C}]{\text{Cu(OAc)}_2 \text{ (20 mol\%)}}$  Cc1c[nH]c2ccccc1c2Sc3ccccc3

**1a**                      **2a**                      **3a**

| Entry    | Cat.                       | Solvent           | Temp.(°C)  | Yield(%) <sup>b</sup> |
|----------|----------------------------|-------------------|------------|-----------------------|
| 1        | Cu(OAc) <sub>2</sub>       | DCE               | 120        | 50                    |
| 2        | Cu(OAc) <sub>2</sub>       | toluene           | 120        | 55                    |
| 3        | Cu(OAc) <sub>2</sub>       | DMF               | 120        | --                    |
| 4        | Cu(OAc) <sub>2</sub>       | DMSO              | 120        | 37                    |
| 5        | Cu(OAc) <sub>2</sub>       | NMP               | 120        | --                    |
| 6        | Cu(OAc) <sub>2</sub>       | chlorobenzene     | 120        | 38                    |
| 7        | Cu(OAc) <sub>2</sub>       | forbenzene        | 120        | 24                    |
| 8        | Cu(OAc) <sub>2</sub>       | para-xylene       | 120        | 52                    |
| <b>9</b> | <b>Cu(OAc)<sub>2</sub></b> | <b>mesitylene</b> | <b>120</b> | <b>57</b>             |
| 10       | Cu(OAc) <sub>2</sub>       | 1,4-dioxane       | 120        | --                    |

<sup>a</sup> Reactions were carried out by using **1a** (0.1 mmol), **2a** (0.15 mmol), Cu(OAc)<sub>2</sub> (0.02 mmol) and solvent (1 mL) stirred at 120°C for 12 h.<sup>b</sup> Isolated yields.

**Table S3. Screening of additives<sup>a</sup>**

Cc1c[nH]c2ccccc12 + c1ccc(cc1)SSc2ccccc2  $\xrightarrow[\text{Additive, 120 } ^\circ\text{C, 12h}]{\text{Cu(OAc)}_2 \text{ (20 mol\%)}}$  Cc1c[nH]c2ccccc1c2Sc3ccccc3

**1a**                      **2a**                      **3a**

| Entry    | Cat.                       | Additive                        | Temp.(°C)  | Yield(%)  |
|----------|----------------------------|---------------------------------|------------|-----------|
| 1        | Cu(OAc) <sub>2</sub>       | Li <sub>2</sub> CO <sub>3</sub> | 120        | --        |
| 2        | Cu(OAc) <sub>2</sub>       | Na <sub>2</sub> CO <sub>3</sub> | 120        | --        |
| 3        | Cu(OAc) <sub>2</sub>       | K <sub>2</sub> CO <sub>3</sub>  | 120        | --        |
| 4        | Cu(OAc) <sub>2</sub>       | Cs <sub>2</sub> CO <sub>3</sub> | 120        | --        |
| 5        | Cu(OAc) <sub>2</sub>       | NaHCO <sub>3</sub>              | 120        | 23        |
| 6        | Cu(OAc) <sub>2</sub>       | KHCO <sub>3</sub>               | 120        | 33        |
| 7        | Cu(OAc) <sub>2</sub>       | K <sub>2</sub> HPO <sub>4</sub> | 120        | 24        |
| <b>8</b> | <b>Cu(OAc)<sub>2</sub></b> | <b>PhCOOH</b>                   | <b>120</b> | <b>70</b> |
| 9        | Cu(OAc) <sub>2</sub>       | Piv-OH                          | 120        | 57        |
| 10       | Cu(OAc) <sub>2</sub>       | AcOH                            | 120        | 44        |

<sup>a</sup> Reactions were carried out by using **1a** (0.1 mmol), **2a** (0.15 mmol), Cu(OAc)<sub>2</sub> (0.02 mmol), additive (0.2 mol) and mesitylene (1 mL) stirred at 120°C for 12 h.<sup>b</sup> Isolated yields.

**Table S4. Screening of additives equivalent and reaction temperature<sup>a</sup>**

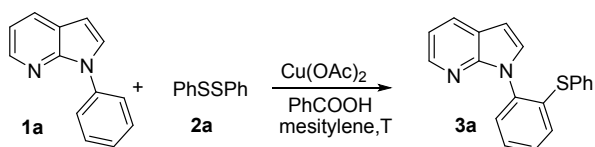

| Entry | Cat.                       | Additive              | Temp.(°C)  | Yield(%)  |
|-------|----------------------------|-----------------------|------------|-----------|
| 1     | Cu(OAc) <sub>2</sub>       | PhCOOH(1 eq)          | 120        | 72        |
| 2     | Cu(OAc) <sub>2</sub>       | PhCOOH(0.5 eq)        | 120        | 70        |
| 3     | Cu(OAc) <sub>2</sub>       | PhCOOH(0.2 eq)        | 120        | 77        |
| 4     | Cu(OAc) <sub>2</sub>       | PhCOOH(0.1 eq)        | 120        | 44        |
| 5     | Cu(OAc) <sub>2</sub>       | PhCOOH(0.2 eq)        | 100        | 55        |
| 6     | <b>Cu(OAc)<sub>2</sub></b> | <b>PhCOOH(0.2 eq)</b> | <b>140</b> | <b>87</b> |
| 7     | --                         | PhCOOH(0.2 eq)        | 140        | --        |

<sup>a</sup> Reactions were carried out by using **1a** (0.1 mmol), **2a** (0.15 mmol), Cu(OAc)<sub>2</sub> (0.02 mmol), additive and mesitylene (1 mL) stirred for 12 h. <sup>b</sup> Isolated yields.

## 2.3 General Procedures for the Thiolation

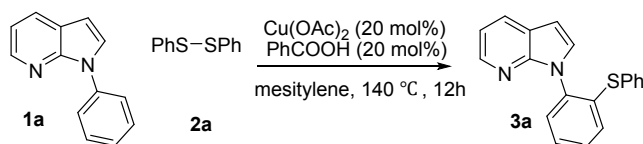

To a oven-dried sealed tube was added *N*-aryl-7-azaindoles **1** (0.2 mmol), disulfide **2** (0.3 mmol), Cu(OAc)<sub>2</sub> (7.2 mg, 0.04 mmol), PhCOOH (4.9 mg, 0.04 mmol) and mesitylene (2.0 mL). The mixture was stirred at 140°C for 12 hours until the complete consumption of **1** as monitored by TLC analysis. The reaction mixture was then diluted with water and extracted with ethyl acetate. After the combined organic layers were washed with brine, dried over Na<sub>2</sub>SO<sub>4</sub>, and concentrated under reduced pressure, the residue was purified by flash column chromatography on silica gel using petroleum ether/ethyl acetate as eluent (8:1, V/V) to afford the pure product **3**.

### 1-(2-(phenylthio)phenyl)-1H-pyrrolo[2,3-*b*]pyridine (**3a**)

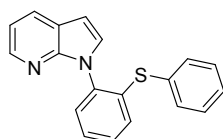

<sup>1</sup>H NMR (400 MHz, CDCl<sub>3</sub>) δ: 8.32 (dd, *J* = 4.8, 1.5 Hz, 1H), 7.95 (dd, *J* = 7.8, 1.5 Hz, 1H), 7.50-7.45 (m, 1H), 7.42-7.36 (m, 2H), 7.34 (dd, *J* = 6.1, 1.5 Hz, 2H), 7.27-

7.25 (m, 1H), 7.24 (dd,  $J = 2.2, 1.2$  Hz, 1H), 7.20-7.13 (m, 3H), 7.10 (dd,  $J = 7.8, 4.8$  Hz, 1H), 6.61 (d,  $J = 3.6$  Hz, 1H);  $^{13}\text{C}$  NMR (101 MHz,  $\text{CDCl}_3$ )  $\delta$ : 147.59, 143.01, 137.06, 135.62, 133.89, 133.48, 132.04, 129.60, 129.25, 129.15, 128.99, 127.76, 127.46, 124.76, 120.69, 116.34, 101.03; HRMS (ESI):  $m/z$  calcd. for  $\text{C}_{19}\text{H}_{15}\text{N}_2\text{S}$ ,  $[\text{M}+\text{H}]^+$ : 303.0950, found: 303.0942.

**1-(4-methyl-2-(phenylthio)phenyl)-1H-pyrrolo[2,3-*b*]pyridine (3b)**

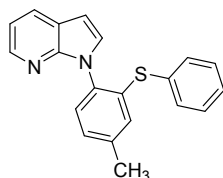

$^1\text{H}$  NMR (400 MHz,  $\text{CDCl}_3$ )  $\delta$ : 8.33-8.27 (m, 1H), 7.92 (dd,  $J = 7.8, 1.3$  Hz, 1H), 7.41-7.33 (m, 2H), 7.21 (d,  $J = 5.8$  Hz, 4H), 7.19-7.11 (m, 3H), 7.07 (dd,  $J = 7.8, 4.7$  Hz, 1H), 6.57 (d,  $J = 3.6$  Hz, 1H), 2.34 (s, 3H);  $^{13}\text{C}$  NMR (101 MHz,  $\text{CDCl}_3$ )  $\delta$ : 148.15, 143.34, 139.08, 135.07, 134.75, 134.42, 132.99, 131.58, 129.58, 128.98, 128.88, 128.85, 128.82, 127.15, 120.43, 116.23, 100.68, 21.10; HRMS (ESI):  $m/z$  calcd. for  $\text{C}_{20}\text{H}_{17}\text{N}_2\text{S}$ ,  $[\text{M}+\text{H}]^+$ : 317.1107, found: 317.1103.

**1-(4-methoxy-2-(phenylthio)phenyl)-1H-pyrrolo[2,3-*b*]pyridine (3c)**

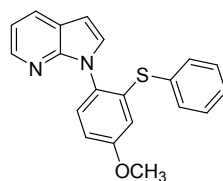

$^1\text{H}$  NMR (400 MHz,  $\text{CDCl}_3$ )  $\delta$ : 8.33 (dd,  $J = 4.8, 1.5$  Hz, 1H), 7.95 (dd,  $J = 7.8, 1.5$  Hz, 1H), 7.37 (d,  $J = 8.6$  Hz, 1H), 7.33 (d,  $J = 3.6$  Hz, 1H), 7.29 (d,  $J = 1.8$  Hz, 1H), 7.27 (d,  $J = 1.5$  Hz, 1H), 7.21-7.15 (m, 3H), 7.10 (dd,  $J = 7.8, 4.8$  Hz, 1H), 6.90 (dd,  $J = 8.6, 2.8$  Hz, 1H), 6.82 (d,  $J = 2.8$  Hz, 1H), 6.60 (d,  $J = 3.6$  Hz, 1H), 3.74 (s, 3H);  $^{13}\text{C}$  NMR (101 MHz,  $\text{CDCl}_3$ )  $\delta$ : 158.72, 141.81, 136.37, 132.25, 131.50, 129.07, 128.06, 126.73, 119.71, 115.76, 115.20, 111.93, 99.79, 54.52; HRMS (ESI):  $m/z$  calcd. for  $\text{C}_{20}\text{H}_{17}\text{N}_2\text{OS}$ ,  $[\text{M}+\text{H}]^+$ : 333.1056, found: 333.1052.

**1-(4-(tert-butyl)-2-(phenylthio)phenyl)-1H-pyrrolo[2,3-*b*]pyridine (3d)**

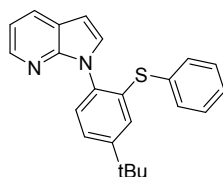

$^1\text{H}$  NMR (400 MHz,  $\text{CDCl}_3$ )  $\delta$ : 8.31 (dd,  $J = 4.7, 1.5$  Hz, 1H), 7.90 (dd,  $J = 7.8, 1.4$  Hz, 1H), 7.48-7.45 (m, 1H), 7.45-7.41 (m, 2H), 7.35 (s, 1H), 7.21-7.17 (m, 2H), 7.16-7.11 (m, 2H), 7.11-7.07 (m, 1H), 7.08-7.04 (m, 1H), 6.56 (d,  $J = 3.6$  Hz, 1H), 1.29 (s, 9H);  $^{13}\text{C}$  NMR (101 MHz,  $\text{CDCl}_3$ )  $\delta$ : 151.79, 148.08, 143.38, 135.19, 134.67, 133.89, 131.15, 130.15, 129.58, 128.74, 128.62, 126.96, 125.33, 120.40, 116.21, 34.78, 31.13; HRMS (ESI):  $m/z$  calcd. for  $\text{C}_{23}\text{H}_{23}\text{N}_2\text{S}$ ,  $[\text{M}+\text{H}]^+$ : 359.1576, found: 359.1568.

**1-(4-fluoro-2-(phenylthio)phenyl)-1H-pyrrolo[2,3-*b*]pyridine (3e)**

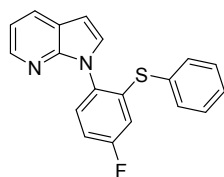

$^1\text{H}$  NMR (400 MHz,  $\text{CDCl}_3$ )  $\delta$ : 8.34 (dd,  $J = 4.7, 1.5$  Hz, 1H), 7.96 (dd,  $J = 7.8, 1.5$  Hz, 1H), 7.42-7.38 (m, 1H), 7.38-7.34 (m, 3H), 7.29-7.26 (m, 3H), 7.12 (dd,  $J = 7.8, 4.7$  Hz, 1H), 7.03 (dd,  $J = 8.1, 2.8$  Hz, 1H), 6.86 (dd,  $J = 9.1, 2.8$  Hz, 1H), 6.64 (d,  $J = 3.6$  Hz, 1H);  $^{13}\text{C}$  NMR (101 MHz,  $\text{CDCl}_3$ )  $\delta$ : 163.56, 161.08, 148.14, 143.60, 139.73, 139.65, 133.65, 131.98, 131.78, 130.52, 130.43, 129.43, 129.31, 129.03, 128.61, 120.45, 116.77, 116.52, 113.97, 113.74, 101.19;  $^{19}\text{F}$  NMR (376 MHz,  $\text{CDCl}_3$ )  $\delta$ : -111.91; HRMS (ESI):  $m/z$  calcd. for  $\text{C}_{19}\text{H}_{14}\text{FN}_2\text{S}$ ,  $[\text{M}+\text{H}]^+$ : 321.0856, found: 321.0849.

**1-(4-chloro-2-(phenylthio)phenyl)-1H-pyrrolo[2,3-*b*]pyridine (3f)**

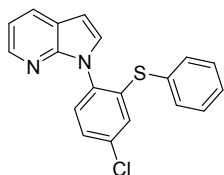

$^1\text{H}$  NMR (400 MHz,  $\text{CDCl}_3$ )  $\delta$ : 8.33 (dd,  $J = 4.7, 1.3$  Hz, 1H), 7.94 (dd,  $J = 7.8, 1.6$  Hz, 1H), 7.41-7.35 (m, 2H), 7.33-7.29 (m, 3H), 7.25 (dd,  $J = 5.5, 3.7$  Hz, 3H), 7.20 (d,  $J = 2.1$  Hz, 1H), 7.11 (dd,  $J = 7.8, 4.7$  Hz, 1H), 6.63 (d,  $J = 3.6$  Hz, 1H);  $^{13}\text{C}$  NMR (101 MHz,  $\text{CDCl}_3$ )  $\delta$ : 148.07, 143.62, 138.49, 134.90, 134.59, 134.24, 133.11, 132.13, 130.22, 130.10, 129.35, 129.05, 128.98, 128.36, 127.27, 120.45, 116.59, 101.34; HRMS (ESI):  $m/z$  calcd. for  $\text{C}_{19}\text{H}_{14}\text{ClN}_2\text{S}$ ,  $[\text{M}+\text{H}]^+$ : 337.0561, found: 337.0558.

**1-(4-bromo-2-(phenylthio)phenyl)-1H-pyrrolo[2,3-*b*]pyridine (3g)**

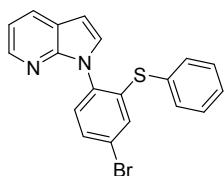

$^1\text{H}$  NMR (400 MHz,  $\text{CDCl}_3$ )  $\delta$ : 8.32 (dd,  $J = 4.7, 1.5$  Hz, 1H), 7.95 (dd,  $J = 7.8, 1.6$  Hz, 1H), 7.47 (dd,  $J = 8.3, 2.2$  Hz, 1H), 7.37-7.35 (m, 2H), 7.34-7.28 (m, 3H), 7.26-7.21 (m, 3H), 7.11 (dd,  $J = 7.8, 4.8$  Hz, 1H), 6.63 (d,  $J = 3.6$  Hz, 1H);  $^{13}\text{C}$  NMR (101 MHz,  $\text{CDCl}_3$ )  $\delta$ : 147.89, 143.52, 138.64, 135.49, 133.31, 132.95, 132.25, 130.43, 130.35, 129.35, 129.11, 129.06, 128.32, 122.62, 120.54, 116.62, 101.42; HRMS (ESI):  $m/z$  calcd. for  $\text{C}_{19}\text{H}_{14}\text{BrN}_2\text{S}$ ,  $[\text{M}+\text{H}]^+$ : 381.0056, found: 381.0048.

**1-(4-iodo-2-(phenylthio)phenyl)-1H-pyrrolo[2,3-*b*]pyridine (3h)**

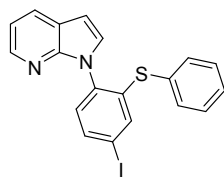

$^1\text{H}$  NMR (400 MHz,  $\text{CDCl}_3$ )  $\delta$ : 8.33-8.26 (m, 1H), 7.92 (dd,  $J = 7.8, 1.2$  Hz, 1H), 7.68 (dd,  $J = 8.2, 1.8$  Hz, 1H), 7.59 (d,  $J = 1.8$  Hz, 1H), 7.34 (d,  $J = 3.6$  Hz, 1H), 7.28-7.23 (m, 2H), 7.19 (m,  $J = 8.1, 4.9$  Hz, 4H), 7.09 (dd,  $J = 7.8, 4.8$  Hz, 1H), 6.60 (d,  $J = 3.6$  Hz, 1H);  $^{13}\text{C}$  NMR (101 MHz,  $\text{CDCl}_3$ )  $\delta$ : 147.85, 143.49, 139.68, 138.34, 136.54, 132.61, 132.55, 130.67, 129.27, 129.08, 129.03, 128.12, 120.56, 116.61, 101.42, 94.09; HRMS (ESI):  $m/z$  calcd. for  $\text{C}_{19}\text{H}_{14}\text{IN}_2\text{S}$ ,  $[\text{M}+\text{H}]^+$ : 482.9917, found: 482.9910.

**1-(4-nitro-2-(phenylthio)phenyl)-1H-pyrrolo[2,3-*b*]pyridine (3i)**

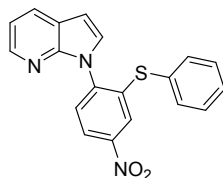

$^1\text{H}$  NMR (400 MHz,  $\text{CDCl}_3$ )  $\delta$ : 8.34 (d,  $J = 4.6$  Hz, 1H), 8.14 (dd,  $J = 8.6, 2.4$  Hz, 1H), 8.02 (d,  $J = 2.3$  Hz, 1H), 7.97 (d,  $J = 7.8$  Hz, 1H), 7.64 (d,  $J = 8.6$  Hz, 1H), 7.47 (d,  $J = 3.6$  Hz, 1H), 7.36-7.33 (m, 2H), 7.31-7.26 (m, 3H), 7.15 (dd,  $J = 7.8, 4.8$  Hz, 1H), 6.69 (d,  $J = 3.6$  Hz, 1H);  $^{13}\text{C}$  NMR (126 MHz,  $\text{CDCl}_3$ )  $\delta$ : 147.74, 147.17, 143.72, 141.03, 138.87, 134.55, 133.56, 130.91, 129.85, 129.68, 129.49, 129.30, 129.08, 128.36, 125.10, 121.56, 120.75, 117.16, 102.43; HRMS (ESI):  $m/z$  calcd. for  $\text{C}_{19}\text{H}_{14}\text{N}_3\text{O}_2\text{S}$ ,  $[\text{M}+\text{H}]^+$ : 348.0801, found: 348.0811.

**3-(phenylthio)-4-(1H-pyrrolo[2,3-*b*]pyridin-1-yl)benzonitrile (3j)**

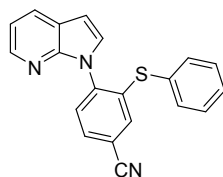

$^1\text{H}$  NMR (400 MHz,  $\text{CDCl}_3$ )  $\delta$ : 8.36-8.31 (m, 1H), 8.00-7.96 (m, 1H), 7.59 (s, 2H), 7.44 (d,  $J = 3.6$  Hz, 1H), 7.43-7.38 (m, 2H), 7.38-7.33 (m, 3H), 7.30 (dd,  $J = 7.3, 3.3$  Hz, 3H), 7.17-7.14 (m, 1H), 6.69 (d,  $J = 3.7$  Hz, 1H);  $^{13}\text{C}$  NMR (101 MHz,  $\text{CDCl}_3$ )  $\delta$ : 147.75, 143.74, 143.17, 139.56, 139.01, 134.79, 133.84, 133.40, 130.86, 130.01, 129.94, 129.79, 129.65, 129.59, 129.37, 129.19, 128.50, 128.07, 120.78, 117.90, 117.13, 112.49, 102.30; HRMS (ESI):  $m/z$  calcd. for  $\text{C}_{20}\text{H}_{14}\text{N}_3\text{S}$ ,  $[\text{M}+\text{H}]^+$ : 328.0903, found: 328.0910.

**1-(3-(phenylthio)-4-(1H-pyrrolo[2,3-*b*]pyridin-1-yl)phenyl)ethan-1-one (3k)**

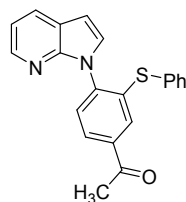

$^1\text{H}$  NMR (400 MHz,  $\text{CDCl}_3$ )  $\delta$ : 8.36 (dd,  $J = 4.7, 1.4$  Hz, 1H), 8.08-8.05 (m, 1H), 8.00-7.92 (m, 3H), 7.62 (d,  $J = 8.3$  Hz, 1H), 7.50-7.43 (m, 2H), 7.27-7.25 (m, 1H), 7.19 (dd,  $J = 5.0, 2.2$  Hz, 2H), 7.15 (dd,  $J = 7.8, 4.8$  Hz, 1H), 6.66 (d,  $J = 3.6$  Hz, 1H), 2.51 (s, 3H);  $^{13}\text{C}$  NMR (101 MHz,  $\text{CDCl}_3$ )  $\delta$ : 196.66, 170.46, 147.67, 143.38, 140.81, 136.96, 136.43, 133.28, 132.91, 132.23, 131.92, 129.97, 129.19, 128.89, 128.33,

127.96, 127.34, 120.79, 116.80, 101.79, 26.56; HRMS (ESI):  $m/z$  calcd. for  $C_{21}H_{17}N_2OS$ ,  $[M+H]^+$ : 345.1056, found: 345.1049.

**1-(2-(phenylthio)-4-(trifluoromethyl)phenyl)-1H-pyrrolo[2,3-*b*]pyridine (3l)**

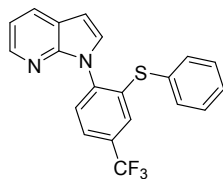

$^1H$  NMR (500 MHz,  $CDCl_3$ )  $\delta$ : 8.16 (d,  $J$  = 5.1 Hz, 1H), 7.43 (d,  $J$  = 7.5 Hz, 1H), 7.40–7.31 (m, 4H), 7.21 (d,  $J$  = 7.1 Hz, 2H), 7.14 (m, 3H), 7.09 (d,  $J$  = 5.1 Hz, 1H), 6.69 (d,  $J$  = 3.5 Hz, 1H);  $^{13}C$  NMR (126 MHz,  $CDCl_3$ )  $\delta$ : 148.47, 143.67, 139.59, 136.81, 136.05, 135.67, 133.59, 133.39, 132.16, 132.03, 129.96, 129.17, 129.10, 128.95, 127.76, 127.53, 119.73, 116.50, 99.46;  $^{19}F$  NMR (376 MHz,  $CDCl_3$ )  $\delta$ : -62.80; HRMS (ESI):  $m/z$  calcd. for  $C_{20}H_{14}F_3N_2S$ ,  $[M+H]^+$ : 371.0824, found: 371.0815.

**1-(3-(phenylthio)-[1,1'-biphenyl]-4-yl)-1H-pyrrolo[2,3-*b*]pyridine (3m)**

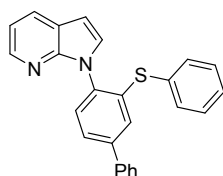

$^1H$  NMR (400 MHz,  $CDCl_3$ )  $\delta$ : 8.32 (dd,  $J$  = 4.7, 1.4 Hz, 1H), 7.92 (dd,  $J$  = 7.8, 1.5 Hz, 1H), 7.59 (m, 2H), 7.54 (d,  $J$  = 8.6 Hz, 1H), 7.52–7.48 (m, 2H), 7.44–7.38 (m, 3H), 7.37–7.33 (m, 1H), 7.26 (d,  $J$  = 1.6 Hz, 1H), 7.25–7.23 (m, 1H), 7.17–7.10 (m, 3H), 7.08 (dd,  $J$  = 7.8, 4.7 Hz, 1H);  $^{13}C$  NMR (101 MHz,  $CDCl_3$ )  $\delta$ : 148.16, 143.50, 141.91, 139.79, 136.51, 135.63, 133.97, 131.79, 130.99, 129.42, 128.99, 128.83, 127.74, 127.42, 127.12, 126.70, 120.48, 116.41, 101.01; HRMS (ESI):  $m/z$  calcd. for  $C_{25}H_{19}N_2S$ ,  $[M+H]^+$ : 379.1263, found: 379.1251.

**1-(5-methyl-2-(phenylthio)phenyl)-1H-pyrrolo[2,3-*b*]pyridine (3n)**

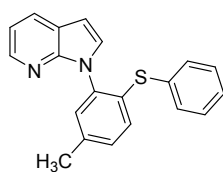

$^1H$  NMR (400 MHz,  $CDCl_3$ )  $\delta$ : 8.30 (dd,  $J$  = 4.7, 1.5 Hz, 1H), 7.91 (dd,  $J$  = 7.8, 1.6 Hz, 1H), 7.36 (d,  $J$  = 8.1 Hz, 1H), 7.33 (t,  $J$  = 2.8 Hz, 2H), 7.20–7.15 (m, 3H), 7.15–7.11 (m, 2H), 7.09 (dd,  $J$  = 3.7, 2.0 Hz, 1H), 7.08–7.05 (m, 1H), 6.57 (d,  $J$  = 3.6 Hz, 1H), 2.41 (s, 3H);  $^{13}C$  NMR (101 MHz,  $CDCl_3$ )  $\delta$ : 148.14, 143.41, 138.65, 137.96, 135.21, 133.30, 131.18, 130.95, 129.89, 129.51, 128.78, 128.76, 126.82, 120.39, 116.25, 100.72, 21.01; HRMS (ESI):  $m/z$  calcd. for  $C_{20}H_{17}N_2S$ ,  $[M+H]^+$ : 333.1056, found: 333.1048.

**1-(2-(phenylthio)-5-(trifluoromethyl)phenyl)-1H-pyrrolo[2,3-*b*]pyridine (3o)**

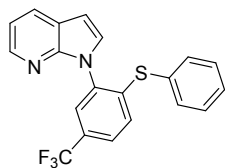

$^1\text{H}$  NMR (400 MHz,  $\text{CDCl}_3$ )  $\delta$ : 8.37 (dd,  $J = 4.7, 1.5$  Hz, 1H), 8.00 (dd,  $J = 7.8, 1.5$  Hz, 1H), 7.69 (s, 1H), 7.53-7.49 (m, 1H), 7.40 (m, 3H), 7.33-7.28 (m, 3H), 7.21 (d,  $J = 8.3$  Hz, 1H), 7.16 (dd,  $J = 7.8, 4.8$  Hz, 1H), 6.69 (d,  $J = 3.6$  Hz, 1H);  $^{13}\text{C}$  NMR (101 MHz,  $\text{CDCl}_3$ )  $\delta$ : 147.79, 143.62, 142.62, 135.69, 134.17, 131.19, 129.74, 129.58, 129.40, 128.95, 128.88, 126.07, 126.03, 125.99, 125.95, 125.52, 125.48, 125.45, 125.41, 124.91, 122.20, 120.69, 116.83, 101.95;  $^{19}\text{F}$  NMR (376 MHz,  $\text{CDCl}_3$ )  $\delta$ : -62.29; HRMS (ESI):  $m/z$  calcd. for  $\text{C}_{20}\text{H}_{14}\text{F}_3\text{N}_2\text{S}$ ,  $[\text{M}+\text{H}]^+$ : 371.0824, found: 371.0817.

**1-(5-methoxy-2-(phenylthio)phenyl)-1H-pyrrolo[2,3-*b*]pyridine (3p)**

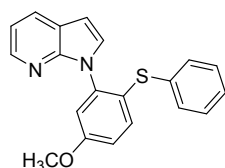

$^1\text{H}$  NMR (400 MHz,  $\text{CDCl}_3$ )  $\delta$ : 8.28 (dd,  $J = 4.8, 1.5$  Hz, 1H), 7.91 (dd,  $J = 7.8, 1.5$  Hz, 1H), 7.53 (d,  $J = 8.7$  Hz, 1H), 7.32 (d,  $J = 3.6$  Hz, 1H), 7.07 (m, 6H), 7.03-6.97 (m, 2H), 6.55 (d,  $J = 3.6$  Hz, 1H), 3.84 (s, 3H).  $^{13}\text{C}$  NMR (101 MHz,  $\text{CDCl}_3$ )  $\delta$ : 160.27, 143.16, 140.31, 136.73, 136.37, 129.65, 129.27, 128.66, 126.14, 123.84, 120.60, 116.33, 115.48, 114.73, 100.82, 55.60; HRMS (ESI):  $m/z$  calcd. for  $\text{C}_{20}\text{H}_{17}\text{N}_2\text{OS}$ ,  $[\text{M}+\text{H}]^+$ : 333.1056, found: 333.1048.

**1-(3-(phenylthio)thiophen-2-yl)-1H-pyrrolo[2,3-*b*]pyridine (3q)**

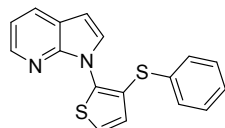

$^1\text{H}$  NMR (400 MHz,  $\text{CDCl}_3$ )  $\delta$ : 8.31 (dd,  $J = 4.7, 1.5$  Hz, 1H), 7.92 (dd,  $J = 7.8, 1.5$  Hz, 1H), 7.49-7.45 (m, 1H), 7.39-7.33 (m, 3H), 7.25 (m, 2H), 7.16 (dd,  $J = 7.9, 1.7$  Hz, 2H), 7.08 (dd,  $J = 7.8, 4.7$  Hz, 1H), 6.59 (d,  $J = 3.6$  Hz, 1H).  $^{13}\text{C}$  NMR (101 MHz,  $\text{CDCl}_3$ )  $\delta$ : 148.11, 143.48, 137.22, 135.61, 133.94, 132.10, 132.01, 129.37, 129.12, 128.96, 128.81, 127.65, 127.44, 120.40, 116.36, 100.90; HRMS (ESI):  $m/z$  calcd. for  $\text{C}_{19}\text{H}_{14}\text{FN}_2\text{S}$ ,  $[\text{M}+\text{H}]^+$ : 321.0856, found: 321.0849.

**1-(2-(phenylthio)phenyl)-1H-pyrazolo[3,4-*b*]pyridine (3r)**

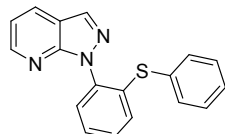

$^1\text{H}$  NMR (400 MHz,  $\text{CDCl}_3$ )  $\delta$ : 8.58 (d,  $J = 4.5$  Hz, 1H), 8.24 (s, 1H), 8.12 (d,  $J = 8.0$  Hz, 1H), 7.57 (d,  $J = 7.6$  Hz, 1H), 7.34 (m, 5H), 7.25-7.17 (m, 4H);  $^{13}\text{C}$  NMR (101 MHz,  $\text{CDCl}_3$ )  $\delta$ : 150.46, 148.96, 136.67, 136.23, 133.86, 132.82, 131.43, 130.51,

129.42, 129.07, 128.27, 127.71, 127.11, 117.43, 116.00; HRMS (ESI):  $m/z$  calcd. for  $C_{18}H_{14}N_3S$ ,  $[M+H]^+$ : 304.0903, found: 304.0890.

**3-bromo-1-(2-(phenylthio)phenyl)-1H-pyrrolo[2,3-*b*]pyridine (3s)**

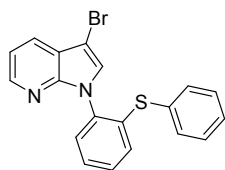

$^1H$  NMR (400 MHz,  $CDCl_3$ )  $\delta$ : 8.33 (dd,  $J = 4.7, 1.4$  Hz, 1H), 7.86 (dd,  $J = 7.9, 1.5$  Hz, 1H), 7.45-7.35 (m, 5H), 7.23-7.19 (m, 2H), 7.18-7.12 (m, 4H).  $^{13}C$  NMR (101 MHz,  $CDCl_3$ )  $\delta$ : 146.93, 144.90, 144.57, 136.35, 135.71, 133.52, 132.24, 132.09, 129.22, 129.16, 128.90, 128.16, 127.81, 127.56, 127.54, 119.83, 116.98, 90.06; HRMS (ESI):  $m/z$  calcd. for  $C_{19}H_{14}BrN_2S$ ,  $[M+H]^+$ : 381.0056, found: 381.0043.

**3-bromo-1-(5-methoxy-2-(phenylthio)phenyl)-1H-pyrrolo[2,3-*b*]pyridine (3t)**

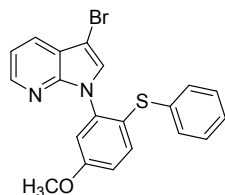

$^1H$  NMR (400 MHz,  $CDCl_3$ )  $\delta$ : 8.32-8.26 (m, 1H), 7.83 (dd,  $J = 7.9, 1.3$  Hz, 1H), 7.55 (d,  $J = 8.7$  Hz, 1H), 7.35 (s, 1H), 7.13 (dd,  $J = 7.9, 4.7$  Hz, 1H), 7.07-7.01 (m, 5H), 6.99 (m, 2H), 3.83 (s, 3H);  $^{13}C$  NMR (101 MHz,  $CDCl_3$ )  $\delta$ : 160.26, 144.10, 139.13, 136.25, 136.04, 129.58, 128.60, 128.47, 127.94, 126.36, 124.23, 120.06, 116.91, 115.67, 114.90, 90.04, 55.62; HRMS (ESI):  $m/z$  calcd. for  $C_{20}H_{16}BrN_2OS$ ,  $[M+H]^+$ : 411.0161, found: 411.0145.

**4-chloro-1-(2-(phenylthio)phenyl)-1H-pyrrolo[2,3-*b*]pyridine (3u)**

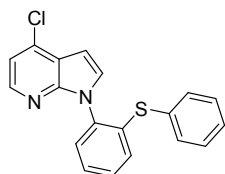

$^1H$  NMR (400 MHz,  $CDCl_3$ )  $\delta$ : 8.18 (d,  $J = 5.2$  Hz, 1H), 7.45 (dt,  $J = 7.4, 1.0$  Hz, 1H), 7.40 (d,  $J = 3.7$  Hz, 2H), 7.39-7.35 (m, 2H), 7.25-7.21 (m, 2H), 7.20-7.14 (m, 3H), 7.11 (d,  $J = 5.2$  Hz, 1H), 6.71 (d,  $J = 3.6$  Hz, 1H);  $^{13}C$  NMR (101 MHz,  $CDCl_3$ )  $\delta$ : 148.65, 143.83, 136.90, 136.02, 135.74, 133.67, 133.47, 132.21, 132.11, 129.96, 129.20, 129.15, 129.00, 127.81, 127.59, 119.74, 116.55, 99.48; HRMS (ESI):  $m/z$  calcd. for  $C_{19}H_{14}ClN_2S$ ,  $[M+H]^+$ : 337.0561, found: 337.0564.

**1-(2-(p-tolylthio)phenyl)-1H-pyrrolo[2,3-*b*]pyridine (3v)**

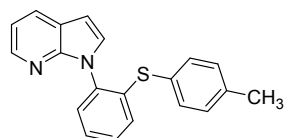

$^1H$  NMR (400 MHz,  $CDCl_3$ )  $\delta$ : 8.38-8.30 (m, 1H), 7.96 (dd,  $J = 7.8, 1.4$  Hz, 1H), 7.45 (dd,  $J = 7.5, 1.6$  Hz, 1H), 7.40 (d,  $J = 3.6$  Hz, 1H), 7.33 (m, 2H), 7.24 (dd,  $J = 7.8, 1.5$

Hz, 1H), 7.20 (d,  $J = 8.1$  Hz, 2H), 7.11 (dd,  $J = 7.8, 4.8$  Hz, 1H), 7.02 (d,  $J = 8.0$  Hz, 2H), 6.63 (d,  $J = 3.6$  Hz, 1H), 2.27 (s, 3H);  $^{13}\text{C}$  NMR (101 MHz,  $\text{CDCl}_3$ )  $\delta$ : 143.26, 138.03, 136.85, 136.38, 134.22, 133.15, 130.89, 129.92, 129.57, 129.03, 128.88, 120.64, 116.32, 100.98, 21.08; HRMS (ESI):  $m/z$  calcd. for  $\text{C}_{20}\text{H}_{17}\text{N}_2\text{S}$ ,  $[\text{M}+\text{H}]^+$ : 317.1107, found: 317.1103.

**1-(2-((4-methoxyphenyl)thio)phenyl)-1H-pyrrolo[2,3-*b*]pyridine (3w)**

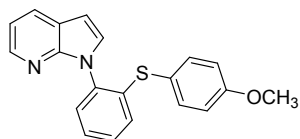

$^1\text{H}$  NMR (400 MHz,  $\text{CDCl}_3$ )  $\delta$ : 8.32 (dd,  $J = 4.7, 1.5$  Hz, 1H), 7.95 (dd,  $J = 7.8, 1.6$  Hz, 1H), 7.41 (dd,  $J = 5.5, 3.0$  Hz, 2H), 7.30-7.28 (m, 2H), 7.27-7.25 (m, 2H), 7.13-7.07 (m, 2H), 6.80-6.74 (m, 2H), 6.64 (d,  $J = 3.6$  Hz, 1H), 3.76 (s, 3H);  $^{13}\text{C}$  NMR (101 MHz,  $\text{CDCl}_3$ )  $\delta$ : 159.91, 148.12, 143.55, 138.01, 135.80, 135.68, 129.63, 129.45, 128.96, 128.89, 128.79, 126.53, 122.89, 120.49, 116.37, 114.84, 100.94, 99.94, 55.27; HRMS (ESI):  $m/z$  calcd. for  $\text{C}_{20}\text{H}_{17}\text{N}_2\text{OS}$ ,  $[\text{M}+\text{H}]^+$ : 333.1056, found: 333.1040.

**1-(2-((4-(tert-butyl)phenyl)thio)phenyl)-1H-pyrrolo[2,3-*b*]pyridine (3x)**

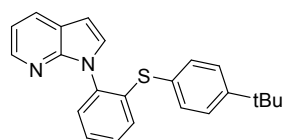

$^1\text{H}$  NMR (400 MHz,  $\text{CDCl}_3$ )  $\delta$ : 8.30 (dd,  $J = 4.8, 1.5$  Hz, 1H), 7.95 (dd,  $J = 7.8, 1.5$  Hz, 1H), 7.46 (m, 1H), 7.42 (d,  $J = 3.6$  Hz, 1H), 7.40-7.36 (m, 1H), 7.36-7.33 (m, 2H), 7.18 (s, 4H), 7.10 (dd,  $J = 7.8, 4.8$  Hz, 1H), 6.62 (d,  $J = 3.6$  Hz, 1H), 1.24 (s, 9H);  $^{13}\text{C}$  NMR (101 MHz,  $\text{CDCl}_3$ )  $\delta$ : 150.92, 142.82, 136.57, 136.28, 132.27, 131.59, 129.76, 129.74, 129.15, 128.93, 127.45, 126.06, 120.82, 116.30, 101.03, 34.47, 31.17; HRMS (ESI):  $m/z$  calcd. for  $\text{C}_{23}\text{H}_{23}\text{N}_2\text{S}$ ,  $[\text{M}+\text{H}]^+$ : 359.1576, found: 359.1562.

**1-(2-((4-fluorophenyl)thio)phenyl)-1H-pyrrolo[2,3-*b*]pyridine (3y)**

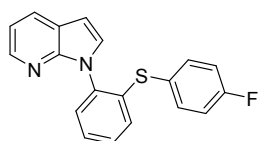

$^1\text{H}$  NMR (400 MHz,  $\text{CDCl}_3$ )  $\delta$ : 8.33 (d,  $J = 4.5$  Hz, 1H), 7.97 (d,  $J = 7.6$  Hz, 1H), 7.46 (d,  $J = 7.2$  Hz, 1H), 7.38 (q,  $J = 11.4, 9.7$  Hz, 3H), 7.32 (d,  $J = 5.1$  Hz, 1H), 7.26-7.20 (m, 2H), 7.12 (dd,  $J = 7.7, 4.9$  Hz, 1H), 6.85 (t,  $J = 8.6$  Hz, 2H), 6.63 (d,  $J = 3.5$  Hz, 1H);  $^{13}\text{C}$  NMR (101 MHz,  $\text{CDCl}_3$ )  $\delta$ : 163.63, 161.16, 147.38, 143.15, 136.62, 136.16, 134.70, 134.62, 132.73, 131.41, 129.85, 129.52, 129.40, 129.31, 129.26, 129.05, 127.71, 120.71, 116.00;  $^{19}\text{F}$  NMR (376 MHz,  $\text{CDCl}_3$ )  $\delta$ : -113.35; HRMS (ESI):  $m/z$  calcd. for  $\text{C}_{19}\text{H}_{14}\text{FN}_2\text{S}$ ,  $[\text{M}+\text{H}]^+$ : 321.0856, found: 321.0850.

**1-(2-((4-chlorophenyl)thio)phenyl)-1H-pyrrolo[2,3-*b*]pyridine (3z)**

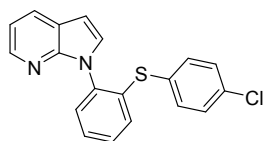

<sup>1</sup>H NMR (400 MHz, CDCl<sub>3</sub>) δ: 8.34-8.26 (m, 1H), 7.96 (d, *J* = 7.7 Hz, 1H), 7.49 (d, *J* = 7.3 Hz, 1H), 7.42 (dq, *J* = 14.2, 7.2 Hz, 3H), 7.36 (d, *J* = 3.5 Hz, 1H), 7.09 (q, *J* = 8.6 Hz, 5H), 6.62 (d, *J* = 3.4 Hz, 1H); <sup>13</sup>C NMR (101 MHz, CDCl<sub>3</sub>) δ: 142.67, 137.37, 134.90, 133.44, 132.71, 132.62, 129.62, 129.47, 129.20, 129.02, 128.45, 120.81, 116.41, 101.29; HRMS (ESI): *m/z* calcd. for C<sub>19</sub>H<sub>14</sub>ClN<sub>2</sub>S, [M+H]<sup>+</sup>: 337.0561, found: 337.0552.

**1-(2-((4-bromophenyl)thio)phenyl)-1H-pyrrolo[2,3-*b*]pyridine (3aa)**

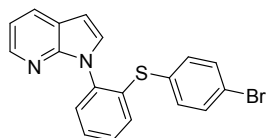

<sup>1</sup>H NMR (400 MHz, CDCl<sub>3</sub>) δ: 8.32-8.27 (m, 1H), 7.95 (d, *J* = 7.8 Hz, 1H), 7.52-7.47 (m, 1H), 7.47-7.42 (m, 2H), 7.39 (dd, *J* = 7.0, 1.6 Hz, 1H), 7.36 (d, *J* = 3.6 Hz, 1H), 7.21 (d, *J* = 8.5 Hz, 2H), 7.11 (dd, *J* = 7.8, 4.8 Hz, 1H), 7.03 (d, *J* = 8.5 Hz, 2H), 6.61 (d, *J* = 3.6 Hz, 1H); <sup>13</sup>C NMR (101 MHz, CDCl<sub>3</sub>) δ: 142.81, 137.54, 134.64, 133.41, 132.97, 132.90, 131.90, 129.55, 129.48, 129.17, 128.53, 124.78, 121.40, 120.60, 116.41, 101.26; HRMS (ESI): *m/z* calcd. for C<sub>19</sub>H<sub>14</sub>BrN<sub>2</sub>S, [M+H]<sup>+</sup>: 381.0056, found: 381.0040.

**1-(2-((4-nitrophenyl)thio)phenyl)-2,3-dihydro-1H-pyrrolo[2,3-*b*]pyridine (3ab)**

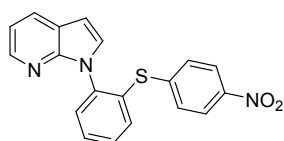

<sup>1</sup>H NMR (400 MHz, CDCl<sub>3</sub>) δ: 8.21 (d, *J* = 4.1 Hz, 1H), 8.18 (d, *J* = 8.8 Hz, 1H), 7.81 (m, 3H), 7.73 (d, *J* = 7.7 Hz, 1H), 7.63-7.58 (m, 3H), 7.50 (dd, *J* = 7.9, 4.2 Hz, 1H), 7.32 (d, *J* = 3.5 Hz, 1H), 7.01 (dd, *J* = 7.8, 4.8 Hz, 1H), 6.52 (d, *J* = 3.6 Hz, 1H); <sup>13</sup>C NMR (101 MHz, CDCl<sub>3</sub>) δ: 147.82, 146.93, 145.71, 145.50, 144.00, 143.36, 139.87, 135.97, 130.62, 130.57, 130.07, 129.27, 129.05, 128.86, 128.13, 126.35, 124.38, 123.37, 120.20, 116.57, 101.35; HRMS (ESI): *m/z* calcd. for C<sub>19</sub>H<sub>14</sub>N<sub>3</sub>O<sub>2</sub>S, [M+H]<sup>+</sup>: 348.0801, found: 348.0797.

**1-(2-((2-fluorophenyl)thio)phenyl)-1H-pyrrolo[2,3-*b*]pyridine (3ac)**

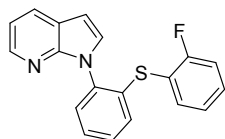

<sup>1</sup>H NMR (400 MHz, CDCl<sub>3</sub>) δ: 8.35-8.29 (m, 1H), 7.99-7.93 (m, 1H), 7.51-7.46 (m, 1H), 7.46-7.39 (m, 2H), 7.36 (m, 2H), 7.20 (m, 1H), 7.17-7.13 (m, 1H), 7.10 (dd, *J* = 7.9, 4.8 Hz, 1H), 6.94 (m, 2H), 6.62 (d, *J* = 3.6 Hz, 1H); <sup>13</sup>C NMR (101 MHz, CDCl<sub>3</sub>) δ: 162.68, 160.21, 147.71, 143.10, 137.28, 134.36, 133.94, 132.01, 129.82, 129.75, 129.51, 129.22, 128.99, 128.07, 124.47, 124.43, 121.05, 120.88, 120.67, 116.39, 115.90, 115.68; <sup>19</sup>F NMR (376 MHz, CDCl<sub>3</sub>) δ: -107.79. HRMS (ESI): *m/z* calcd. for C<sub>19</sub>H<sub>14</sub>FN<sub>2</sub>S, [M+H]<sup>+</sup>: 321.0856, found: 321.0848.

**1-(2-(*m*-tolylthio)phenyl)-1H-pyrrolo[2,3-*b*]pyridine (3ad)**

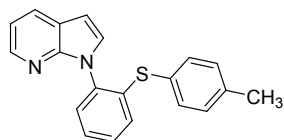

$^1\text{H}$  NMR (400 MHz,  $\text{CDCl}_3$ )  $\delta$ : 8.33 (dd,  $J = 4.7, 1.5$  Hz, 1H), 7.95 (dd,  $J = 7.8, 1.6$  Hz, 1H), 7.48 (dd,  $J = 8.0, 1.0$  Hz, 1H), 7.42-7.36 (m, 2H), 7.34 (dd,  $J = 6.4, 1.7$  Hz, 2H), 7.12-7.09 (m, 1H), 7.08 (d,  $J = 5.2$  Hz, 3H), 6.99-6.93 (m, 1H), 6.62 (d,  $J = 3.6$  Hz, 1H), 2.22 (s, 3H);  $^{13}\text{C}$  NMR (101 MHz,  $\text{CDCl}_3$ )  $\delta$ : 147.84, 143.23, 138.82, 136.98, 135.85, 132.96, 132.79, 132.64, 131.87, 129.53, 129.36, 129.12, 128.93, 128.80, 128.39, 127.54, 120.53, 116.32, 100.89, 21.10; HRMS (ESI):  $m/z$  calcd. for  $\text{C}_{20}\text{H}_{17}\text{N}_2\text{S}$ ,  $[\text{M}+\text{H}]^+$ : 317.1107, found: 317.0998.

**1-(2-(thiophen-2-ylthio)phenyl)-1H-pyrrolo[2,3-*b*]pyridine (3ae)**

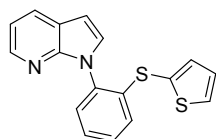

$^1\text{H}$  NMR (400 MHz,  $\text{CDCl}_3$ )  $\delta$ : 8.41 (dd,  $J = 4.9, 1.4$  Hz, 1H), 8.09 (dd,  $J = 7.8, 1.4$  Hz, 1H), 7.41 (m, 3H), 7.37-7.33 (m, 2H), 7.19 (m, 3H), 6.99 (dd,  $J = 5.4, 3.6$  Hz, 1H), 6.73 (d,  $J = 3.6$  Hz, 1H);  $^{13}\text{C}$  NMR (101 MHz,  $\text{CDCl}_3$ )  $\delta$ : 142.06, 137.83, 136.70, 131.67, 130.59, 130.02, 129.53, 128.81, 128.74, 127.94, 127.07, 121.47, 116.48, 101.70; HRMS (ESI):  $m/z$  calcd. for  $\text{C}_{17}\text{H}_{13}\text{N}_2\text{S}_2$ ,  $[\text{M}+\text{H}]^+$ : 309.0515, found: 309.0503.

**1-(2-(propylthio)phenyl)-1H-pyrrolo[2,3-*b*]pyridine (3af)**

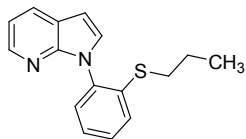

$^1\text{H}$  NMR (400 MHz,  $\text{CDCl}_3$ )  $\delta$ : 8.34 (dd,  $J = 4.7, 1.3$  Hz, 1H), 7.99 (dd,  $J = 7.8, 1.4$  Hz, 1H), 7.53-7.48 (m, 1H), 7.45-7.39 (m, 2H), 7.39 (d,  $J = 3.7$  Hz, 1H), 7.33 (m,  $J = 7.5, 1.3$  Hz, 1H), 7.12 (dd,  $J = 7.8, 4.8$  Hz, 1H), 6.65 (d,  $J = 3.6$  Hz, 1H).  $^{13}\text{C}$  NMR (101 MHz,  $\text{CDCl}_3$ )  $\delta$ : 147.98, 143.41, 136.78, 136.09, 129.61, 129.23, 129.07, 128.98, 128.77, 126.28, 120.55, 116.33, 100.76, 34.88, 22.04, 13.27; HRMS (ESI):  $m/z$  calcd. for  $\text{C}_{16}\text{H}_{17}\text{N}_2\text{S}$ ,  $[\text{M}+\text{H}]^+$ : 269.1107, found: 269.1099.

**1-(2-(cyclohexylthio)phenyl)-1H-pyrrolo[2,3-*b*]pyridine (3ag)**

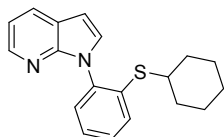

$^1\text{H}$  NMR (400 MHz,  $\text{CDCl}_3$ )  $\delta$ : 8.36-8.29 (m, 1H), 8.05-7.99 (m, 1H), 7.63-7.57 (m, 1H), 7.49-7.43 (m, 1H), 7.39 (dd,  $J = 6.6, 2.6$  Hz, 3H), 7.13 (dd,  $J = 7.8, 4.8$  Hz, 1H), 6.65 (d,  $J = 3.6$  Hz, 1H), 2.77-2.67 (m, 1H), 1.76 (d,  $J = 11.2$  Hz, 2H), 1.63-1.52 (m, 2H), 1.48 (d,  $J = 10.0$  Hz, 1H), 1.07 (q,  $J = 13.2, 10.9$  Hz, 4H), 0.88 (t,  $J = 6.7$  Hz, 1H);  $^{13}\text{C}$  NMR (101 MHz,  $\text{CDCl}_3$ )  $\delta$ : 142.77, 138.11, 134.41, 132.57, 130.13, 129.46, 129.11, 128.71, 127.38, 120.89, 116.24, 100.70, 46.06, 33.06, 25.85, 25.52; HRMS (ESI):  $m/z$  calcd. for  $\text{C}_{19}\text{H}_{21}\text{N}_2\text{S}$ ,  $[\text{M}+\text{H}]^+$ : 309.1420, found: 309.1410.

### 1-(2-(benzylthio)phenyl)-1H-pyrrolo[2,3-*b*]pyridine (**3ah**)

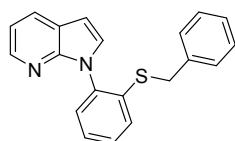

<sup>1</sup>H NMR (500 MHz, CDCl<sub>3</sub>) δ: 8.38 (dd, *J* = 4.9, 1.4 Hz, 1H), 8.06 (dd, *J* = 7.8, 1.3 Hz, 1H), 7.53 (dd, *J* = 7.5, 1.7 Hz, 1H), 7.45-7.37 (m, 3H), 7.27 (d, *J* = 3.6 Hz, 2H), 7.21-7.17 (m, 3H), 7.16-7.09 (m, 2H), 6.66 (d, *J* = 3.6 Hz, 1H), 3.90 (s, 2H); <sup>13</sup>C NMR (126 MHz, CDCl<sub>3</sub>) δ: 141.84, 136.57, 135.48, 130.85, 130.27, 129.85, 129.26, 128.86, 128.40, 127.38, 127.19, 116.35, 101.26, 38.43; HRMS (ESI): *m/z* calcd. for C<sub>20</sub>H<sub>17</sub>N<sub>2</sub>S, [M+H]<sup>+</sup>: 317.1107, found: 317.0998.

### 1-(2-(phenylselanyl)phenyl)-1H-pyrrolo[2,3-*b*]pyridine (**3ai**)

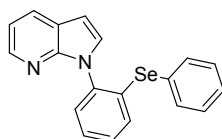

<sup>1</sup>H NMR (400 MHz, CDCl<sub>3</sub>) δ: 8.35 (dd, *J* = 4.7, 1.4 Hz, 1H), 7.99 (dd, *J* = 7.8, 1.4 Hz, 1H), 7.46-7.41 (m, 3H), 7.39 (dd, *J* = 5.5, 3.0 Hz, 2H), 7.29 (dd, *J* = 7.5, 1.5 Hz, 1H), 7.26 (d, *J* = 2.6 Hz, 1H), 7.21 (q, *J* = 5.7 Hz, 3H), 7.13 (dd, *J* = 7.8, 4.8 Hz, 1H), 6.65 (d, *J* = 3.6 Hz, 1H). <sup>13</sup>C NMR (101 MHz, CDCl<sub>3</sub>) δ: 147.65, 143.12, 137.66, 135.39, 134.54, 133.26, 132.57, 129.38, 129.21, 129.07, 128.75, 127.90, 120.67, 116.40, 101.15; HRMS (ESI): *m/z* calcd. for C<sub>19</sub>H<sub>15</sub>N<sub>2</sub>Se, [M+H]<sup>+</sup>: 351.0396, found: 351.0385.

### Diphenylsulfane **4**

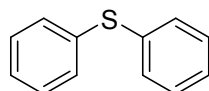

<sup>1</sup>H NMR (400 MHz, CDCl<sub>3</sub>) δ 7.33 (dd, *J* = 5.4, 3.4 Hz, 4H), 7.31-7.26 (m, 4H), 7.24 (d, *J* = 1.4 Hz, 1H), 7.22- 7.19 (m, 1H). <sup>13</sup>C NMR (101 MHz, CDCl<sub>3</sub>) δ 135.75, 131.00, 129.15, 127.00.

### Procedure for gram-scale synthesis of compound **3a**

To a oven-dried sealed tube was added *N*-aryl-7-azaindoles **1a** (970 mg, 5mol), diphenyl disulfide **2a** (1635 mg, 7.5 mol), Cu(OAc)<sub>2</sub> (181.4 mg, 1mol), PhCOOH (122 mg, 1 mmol) and mesitylene (50 mL). The mixture was stirred at 140 °C for 12 hours until the complete consumption of **1** as monitored by TLC analysis. The reaction mixture was then diluted with water and extracted with ethyl acetate. After the combined organic layers were washed with brine, dried over Na<sub>2</sub>SO<sub>4</sub>, and concentrated under reduced pressure, the residue was purified by flash column chromatography on silica gel using petroleum ether/ethyl acetate as eluent (8:1, V/V) to afford the pure product **3a** 1208 mg of 80% yield.

### Procedure for removal the directed group 7-azaindoles

To a oven-dried sealed tube was added **1-(2-(phenylthio)phenyl)-1H-pyrrolo[2,3-*b*]pyridine 3a** (60.4 mg, 0.2 mmol), NaOMe (54.0 mg, 1mmol) and DMSO (5 mL). The mixture was stirred at 140 °C for 4 hours until the complete consumption of **3a** as monitored by TLC analysis. The reaction mixture was then diluted with water and extracted with ethyl acetate. After the combined organic layers were washed with brine, dried over Na<sub>2</sub>SO<sub>4</sub>, and concentrated under reduced pressure, the residue was purified by flash column chromatography on silica gel using petroleum ether/ethyl acetate as eluent (20:1, V/V) to afford the pure product **4** 29.7 mg of 80% yield.

## 2.4 Mechanism investigation

### Procedures for the radical trapping and control experiment

To a 5 mL tube equipped with a magnetic stirring bar, *N*-aryl-7-azaindole **1a** (19.4 mg, 0.1 mmol), diphenyl disulfide **2a** (32.7 mg, 0.15 mmol), Cu(OAc)<sub>2</sub> (3.6 mg, 0.02 mmol), PhCOOH (2.4 mg, 0.02 mmol), 2,2,6,6-tetramethylpiperidineoxy (TEMPO, 46.8 mg, 0.3 mmol) and mesitylene (1 mL) were added. No special precautions were taken to exclude moisture and air. The reaction was stirred at 140 °C for 12 h.

To a 5 mL tube equipped with a magnetic stirring bar, *N*-aryl-7-azaindole **1a** (19.4 mg, 0.1 mmol), diphenyl disulfide **2a** (32.7 mg, 0.15 mmol), Cu(OAc)<sub>2</sub> (3.6 mg, 0.02 mmol), PhCOOH (2.4 mg, 0.02 mmol), 2,6-di-tert-butyl-4-methylphenol (BHT, 66 mg, 0.3 mmol) and mesitylene (1 mL) were added. No special precautions were taken to exclude moisture and air. The reaction was stirred at 140 °C for 12 h.

### Procedures of **1a** reacted with **6**

To a solution of 4-methylbenzenethiol **6** (24.8 mg, 0.2 mmol), Cu(OAc)<sub>2</sub> (3.6 mg, 0.02 mmol), PhCOOH (2.4 mg, 0.02 mmol) and mesitylene (1 mL) were added. No special precautions were taken to exclude moisture and air. The reaction was stirred at 140 °C for 12 h. The reaction mixture was then diluted with water and extracted with ethyl acetate. After the combined organic layers were washed with brine, dried over

Na<sub>2</sub>SO<sub>4</sub>, and concentrated under reduced pressure, the residue was purified by flash column chromatography on silica gel to afford the pure product **2v** (4.9 mg, 20% yield).

#### ***H-D exchange and KIE experiments***

To a oven-dried sealed tube was added *N*-aryl-7-azaindoles **1** (38.8 mg, 0.2 mmol), disulfide **2a** (65.4 mg, 0.3 mmol), Cu(OAc)<sub>2</sub> (7.2 mg, 0.04 mmol), PhCOOH (4.9 mg, 0.04 mmol), D<sub>2</sub>O (40 mg, 2 mmol) and mesitylene (2.0 mL). The mixture was stirred at 140 °C for 2 hours. The reaction mixture was then diluted with water and extracted with ethyl acetate. After the combined organic layers were washed with brine, dried over Na<sub>2</sub>SO<sub>4</sub>, and concentrated under reduced pressure, the residue was purified by flash column chromatography on silica gel using petroleum ether/ethyl acetate as eluent (20:1, V/V) to recovery **1a**.

**Procedure for the synthesis of 1a-d** To a oven-dried sealed tube was added *N*-aryl-7-azaindoles **1** (38.8 mg, 0.2 mmol), [(RhCp<sub>2</sub>Cl<sub>2</sub>)]Cl<sub>2</sub> (6.18 mg, 0.01mol), Cu(OAc)<sub>2</sub> · H<sub>2</sub>O (40 mg, 0.2 mmol), D<sub>2</sub>O (40 mg, 2 mmol) and toluene (2.0 mL). The mixture was stirred at 120 °C for 4 hours. The reaction mixture was then diluted with water and extracted with ethyl acetate. After the combined organic layers were washed with brine, dried over Na<sub>2</sub>SO<sub>4</sub>, and concentrated under reduced pressure, the residue was purified by flash column chromatography on silica gel using petroleum ether/ethyl acetate as eluent (20:1, V/V) to afford the **1a-d** (36 mg of 90% yield and 92% of deuterium).

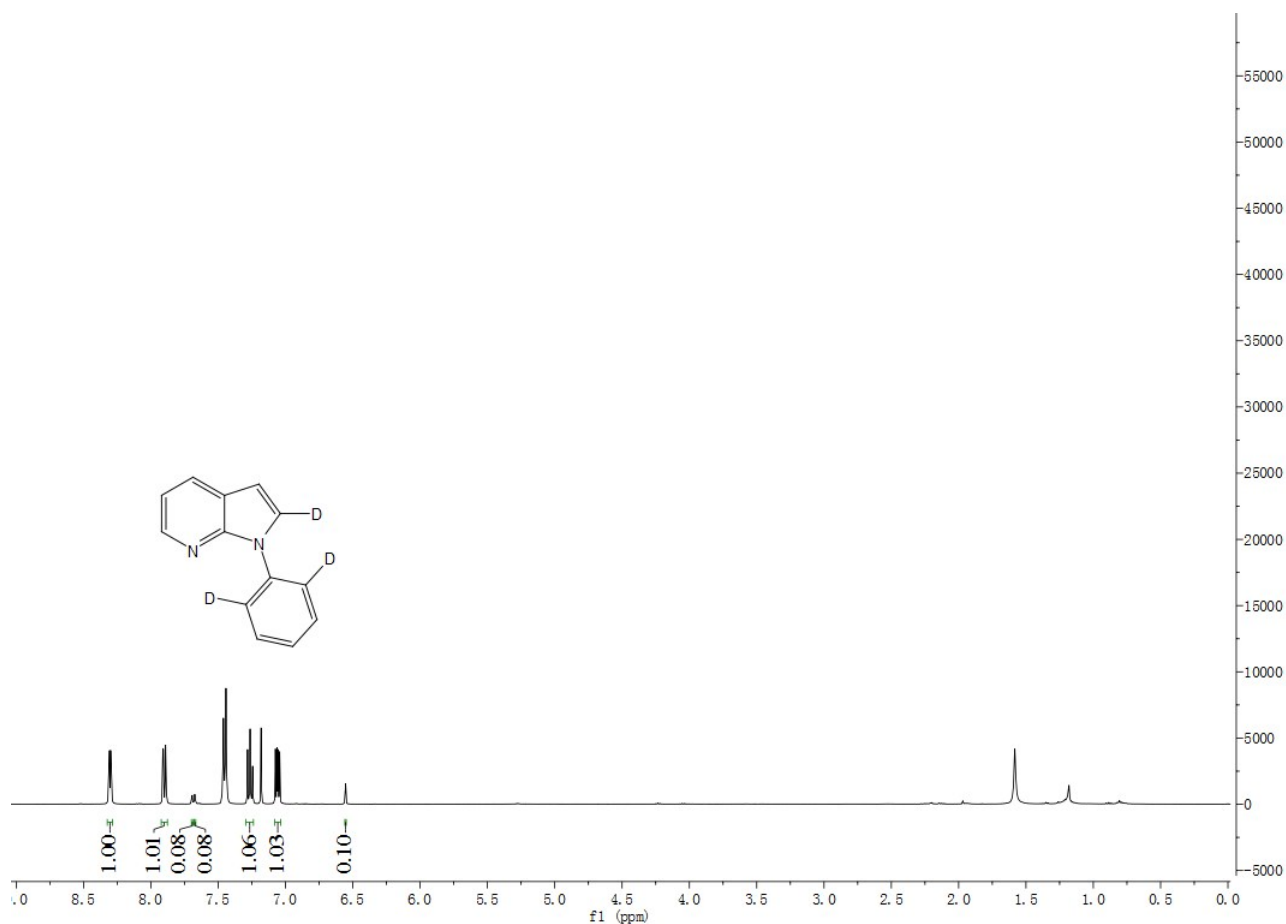

### Procedures of *KIE* experiments

To a 5 mL tube equipped with a magnetic stirring bar, *N*-aryl-7-azaindole **1a** (19.4 mg, 0.1 mmol), diphenyl disulfide **2a** (32.7 mg, 0.15 mmol), Cu(OAc)<sub>2</sub> (3.6 mg, 0.02 mmol), PhCOOH (2.4 mg, 0.02 mmol) and mesitylene (1 mL) were added. No special precautions were taken to exclude moisture and air. The reaction was stirred at 140 °C for 2 h. The reaction mixture was then diluted with water and extracted with ethyl acetate. After the combined organic layers were washed with brine, dried over Na<sub>2</sub>SO<sub>4</sub>, and concentrated under reduced pressure, the residue was purified by flash column chromatography on silica gel using petroleum ether/ethyl acetate as eluent (8:1, V/V) to afford the pure product **3a** 4.68 mg of 15.5% yield.

To a 5 mL tube equipped with a magnetic stirring bar, **1a-d** (20.0 mg, 0.1 mmol), diphenyl disulfide **2a** (32.7 mg, 0.15 mmol), Cu(OAc)<sub>2</sub> (3.6 mg, 0.02 mmol), PhCOOH (2.4 mg, 0.02 mmol) and mesitylene (1 mL) were added. No special precautions were taken to exclude moisture and air. The reaction was stirred at 140 °C

for 2 h. The reaction mixture was then diluted with water and extracted with ethyl acetate. After the combined organic layers were washed with brine, dried over  $\text{Na}_2\text{SO}_4$ , and concentrated under reduced pressure, the residue was purified by flash column chromatography on silica gel using petroleum ether/ethyl acetate as eluent (8:1, V/V) to afford the pure product **3a'** 4.01 mg of 13.2% yield.

### Procedures of investigate the role of $\text{PhCOOH}$

To a 25 mL tube equipped with a magnetic stirring bar,  $\text{CuO}$  (160 mg, 2 mol) and  $\text{PhCOOH}$  (732 mg, 6 mol) was diluted in 10 mL ( $\text{V H}_2\text{O} / \text{MeOH} = 1:1$ ), the mixture was reflux for 4h, and extraction gave the pure  $\text{Cu}(\text{PhCOOH})_2$ .

To a oven-dried sealed tube was added *N*-aryl-7-azaindoles **1a** (38.8 mg, 0.2 mmol), diphenyl disulfide **2a** (65.4 mg, 0.3 mmol),  $\text{Cu}(\text{PhCOO})_2$  (12.1 mg, 0.04 mol),  $\text{PhCOOH}$  (4.9 mg, 0.04 mmol) and mesitylene 2 mL. The mixture was stirred at 140 °C for 12 hours. The reaction mixture was then diluted with water and extracted with ethyl acetate. After the combined organic layers were washed with brine, dried over  $\text{Na}_2\text{SO}_4$ , and concentrated under reduced pressure, the residue was purified by flash column chromatography on silica gel using petroleum ether/ethyl acetate as eluent (8:1, V/V) to afford the pure product **3a** 7.25 mg of 12% yield.

To a oven-dried sealed tube was added *N*-aryl-7-azaindoles **1a** (38.8 mg, 0.2 mmol), diphenyl disulfide **2a** (65.4 mg, 0.3 mmol),  $\text{Cu}(\text{PhCOO})_2$  (12.1 mg, 0.04 mol) and mesitylene 2 mL. The mixture was stirred at 140 °C for 12 hours. The reaction mixture was then diluted with water and extracted with ethyl acetate. After the combined organic layers were washed with brine, dried over  $\text{Na}_2\text{SO}_4$ , and concentrated under reduced pressure, the residue was purified by flash column chromatography on silica gel using petroleum ether/ethyl acetate as eluent (8:1, V/V) to afford the pure product **3a** 13.28 mg of 5% yield.

## 2. Reference

- [1] Vats, T. K.; Mishra, A.; Deb, I. *Adv. Synth. Catal.* **2017**, 360, 2291.
- [2] Coelho, F. L.; Campo, L. F. *Tetrahedron. Lett.* **2017**, 14, 2330.

# Copies of $^1\text{H}$ , $^{13}\text{C}$ and $^{19}\text{F}$ NMR spectra of products

## $^1\text{H}$ NMR spectrum of 3a in $\text{CDCl}_3$

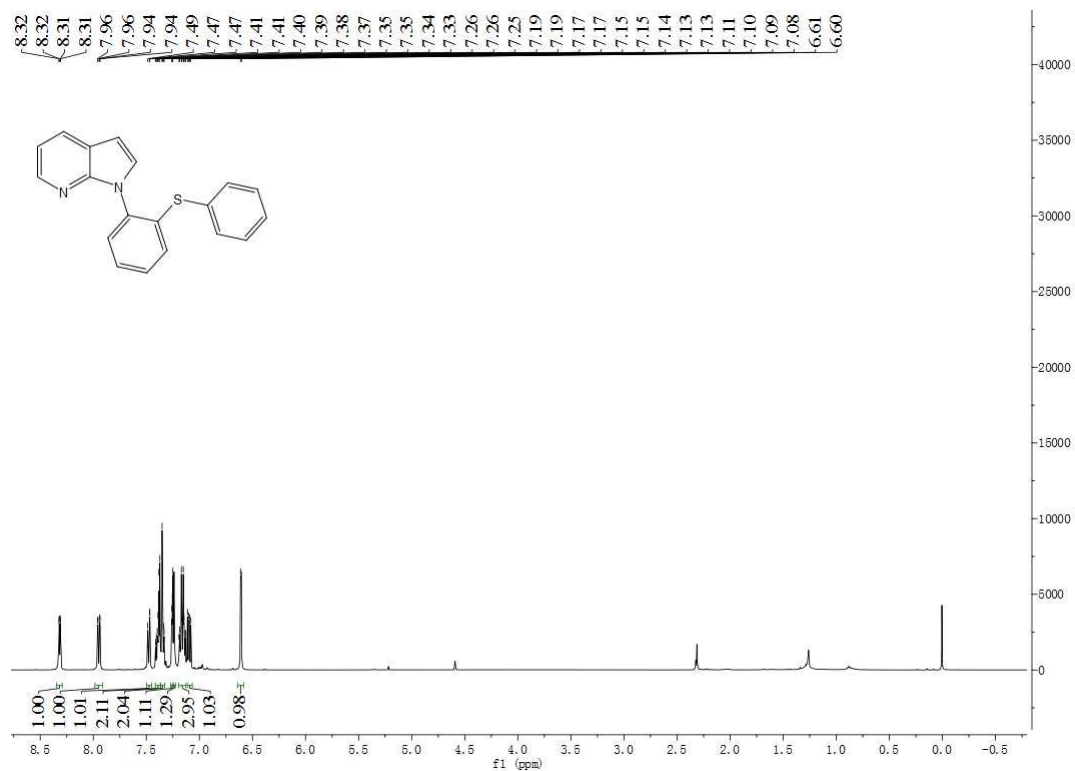

## $^{13}\text{C}$ NMR spectrum of 3a in $\text{CDCl}_3$

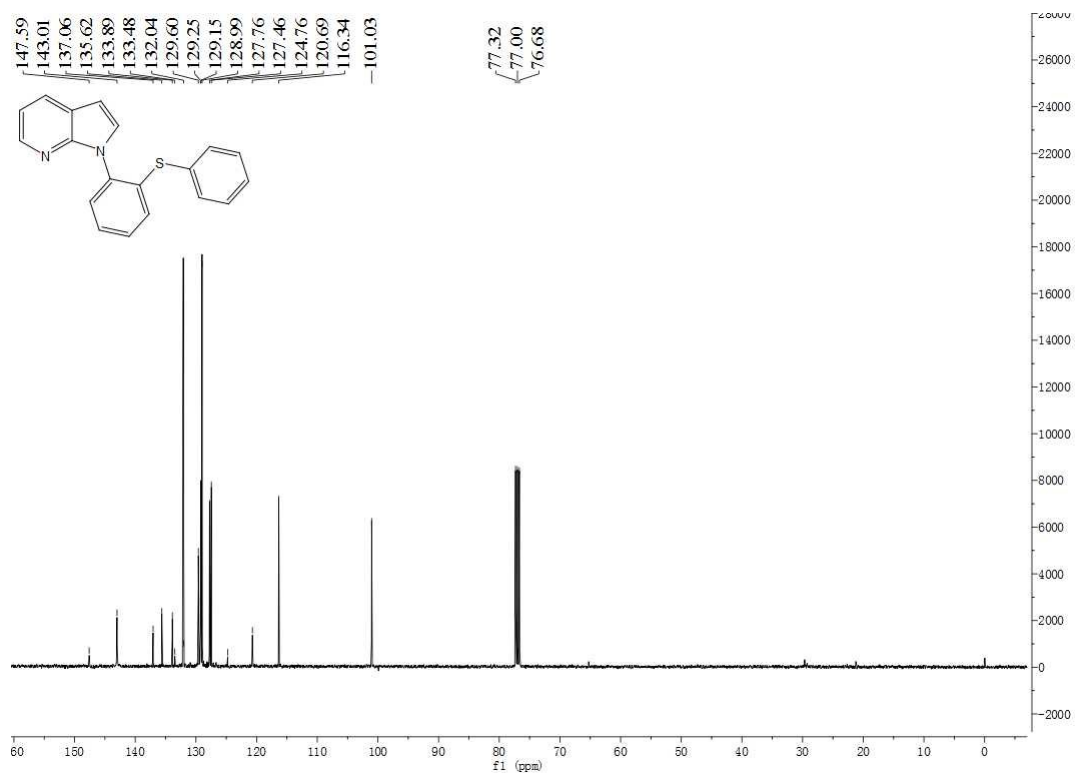

**<sup>1</sup>H NMR spectrum of 3b in CDCl<sub>3</sub>**

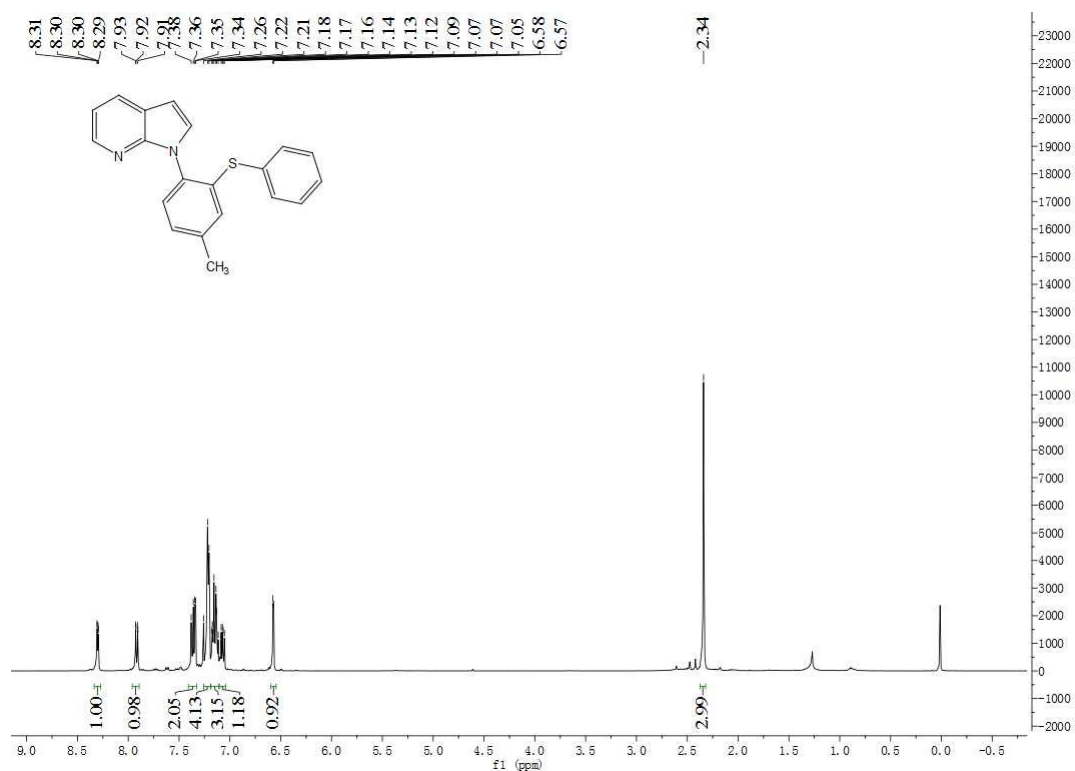

**<sup>13</sup>C NMR spectrum of 3b in CDCl<sub>3</sub>**

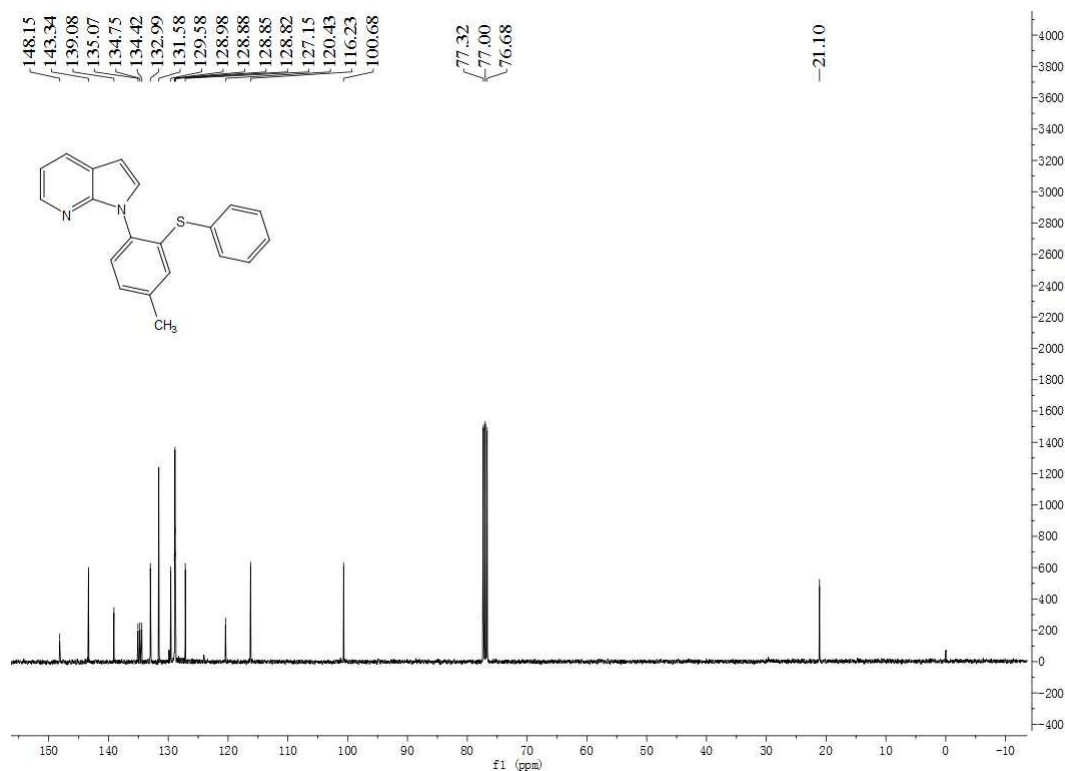

**<sup>1</sup>H NMR spectrum of 3c in CDCl<sub>3</sub>**

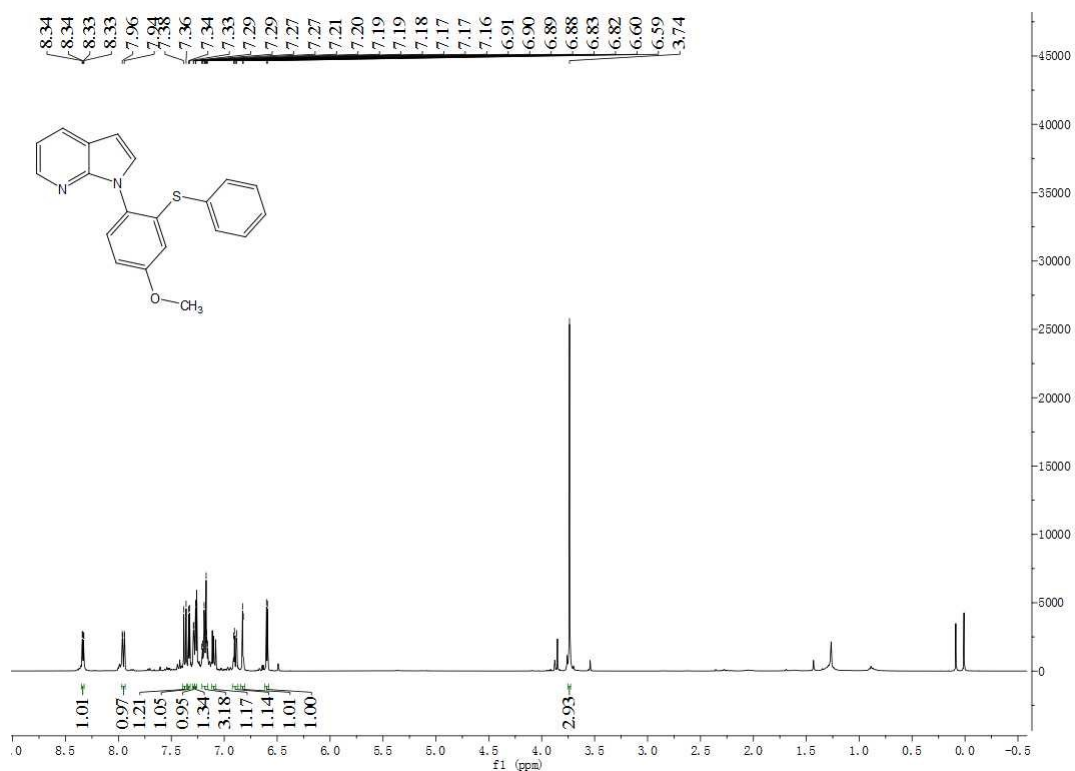

**<sup>13</sup>C NMR spectrum of 3c in CDCl<sub>3</sub>**

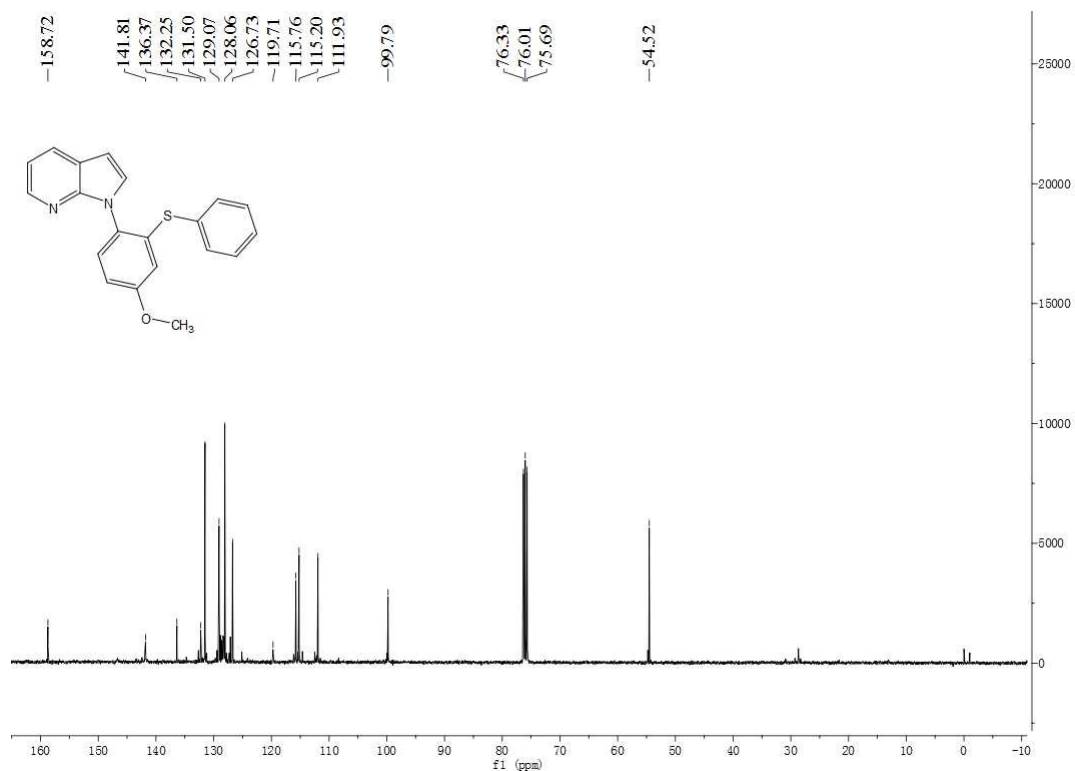

**<sup>1</sup>H NMR spectrum of 3d in CDCl<sub>3</sub>**

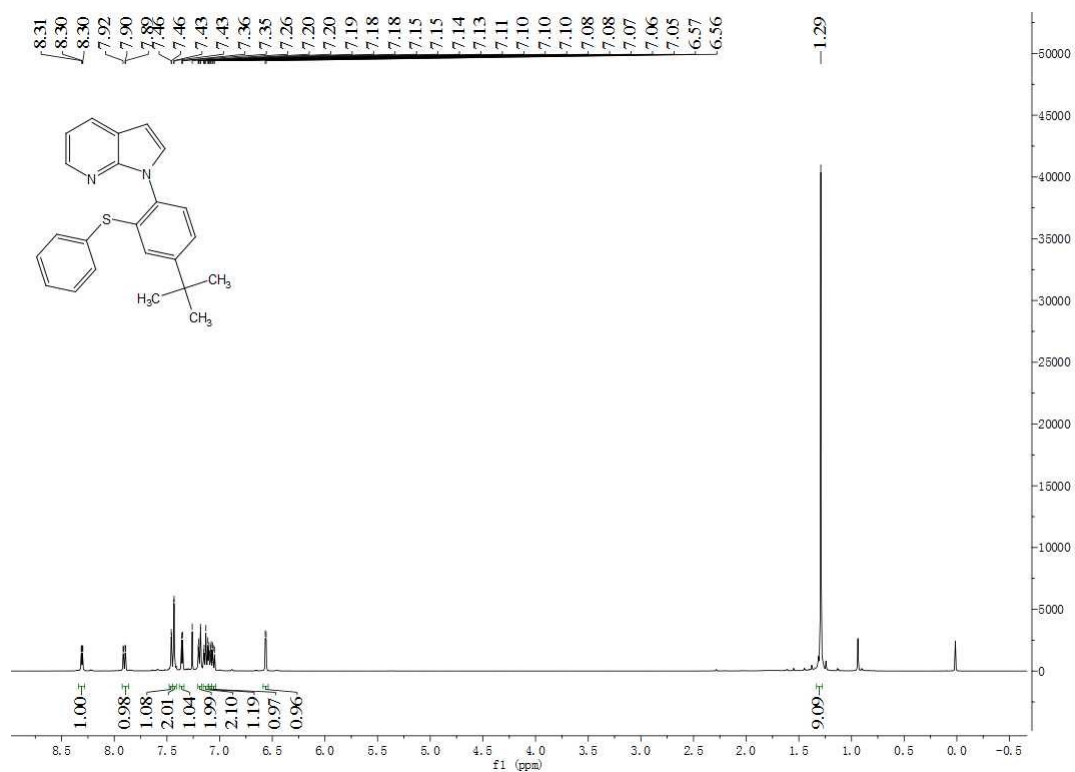

**<sup>13</sup>C NMR spectrum of 3d in CDCl<sub>3</sub>**

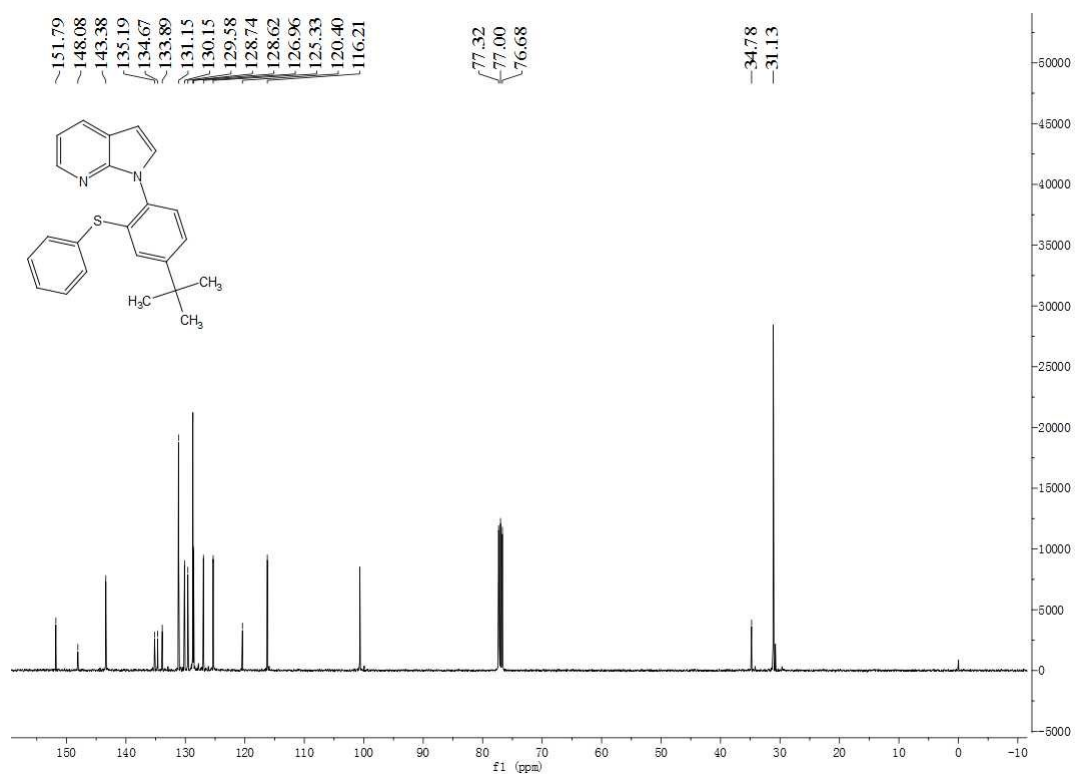

**<sup>1</sup>H NMR spectrum of 3e in CDCl<sub>3</sub>**

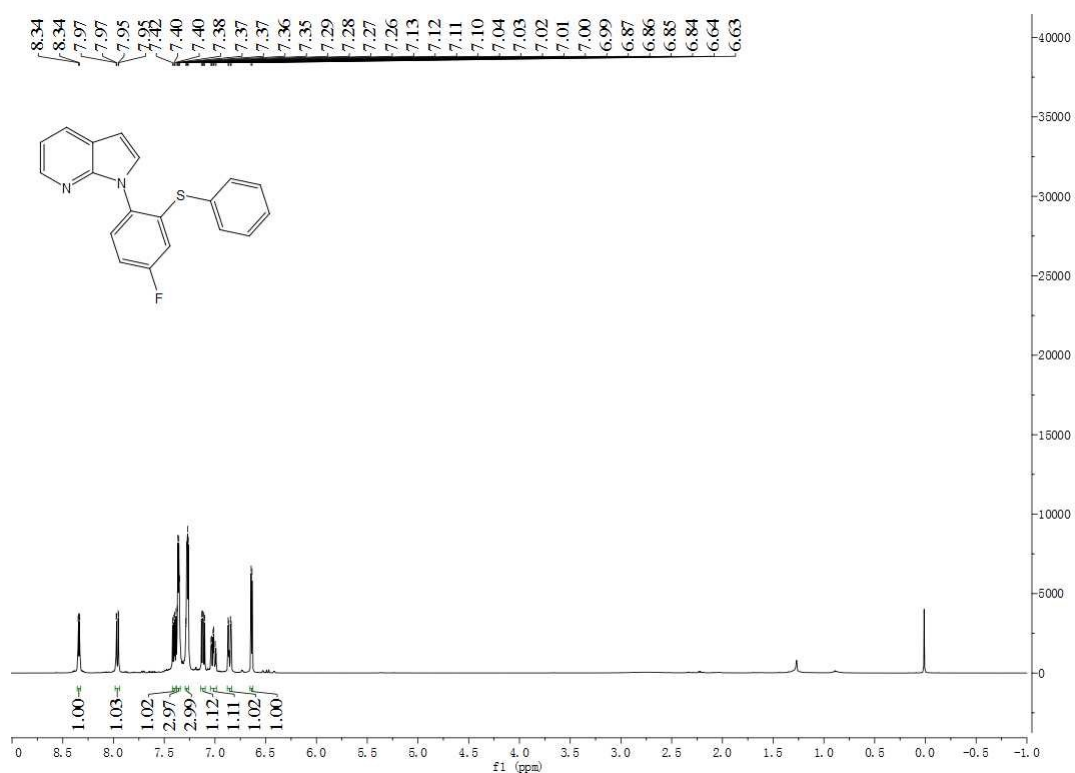

**<sup>13</sup>C NMR spectrum of 3e in CDCl<sub>3</sub>**

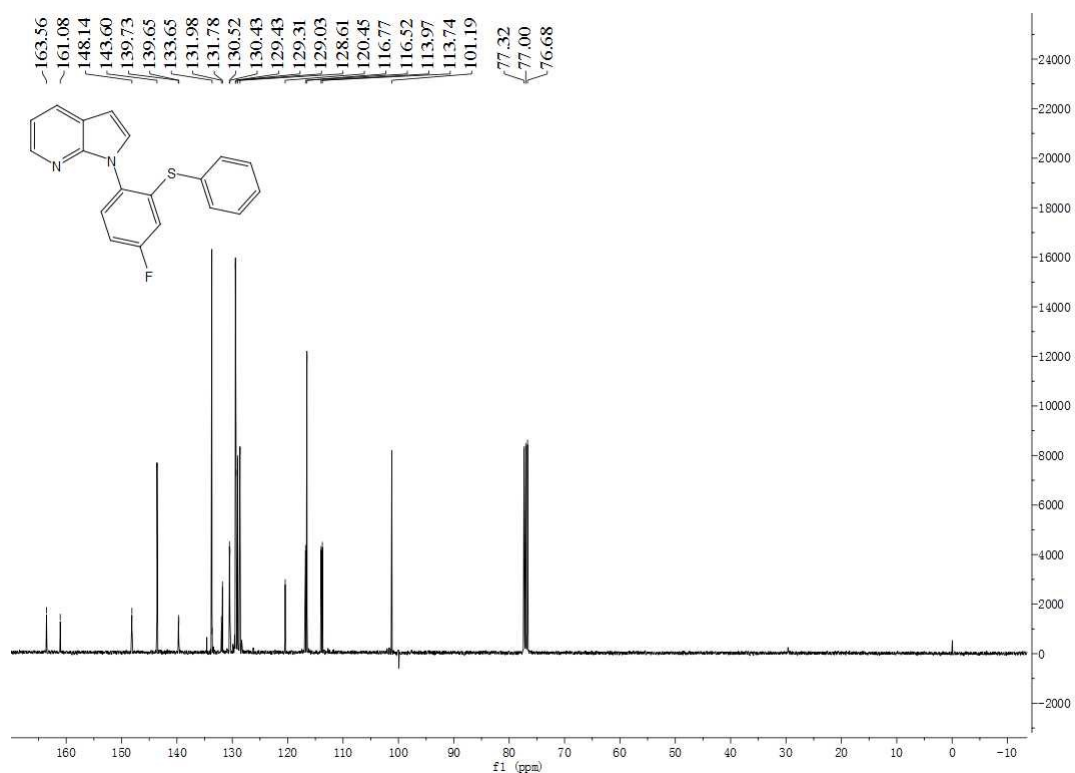

**$^{19}\text{F}$  NMR spectrum of 3e in  $\text{CDCl}_3$**

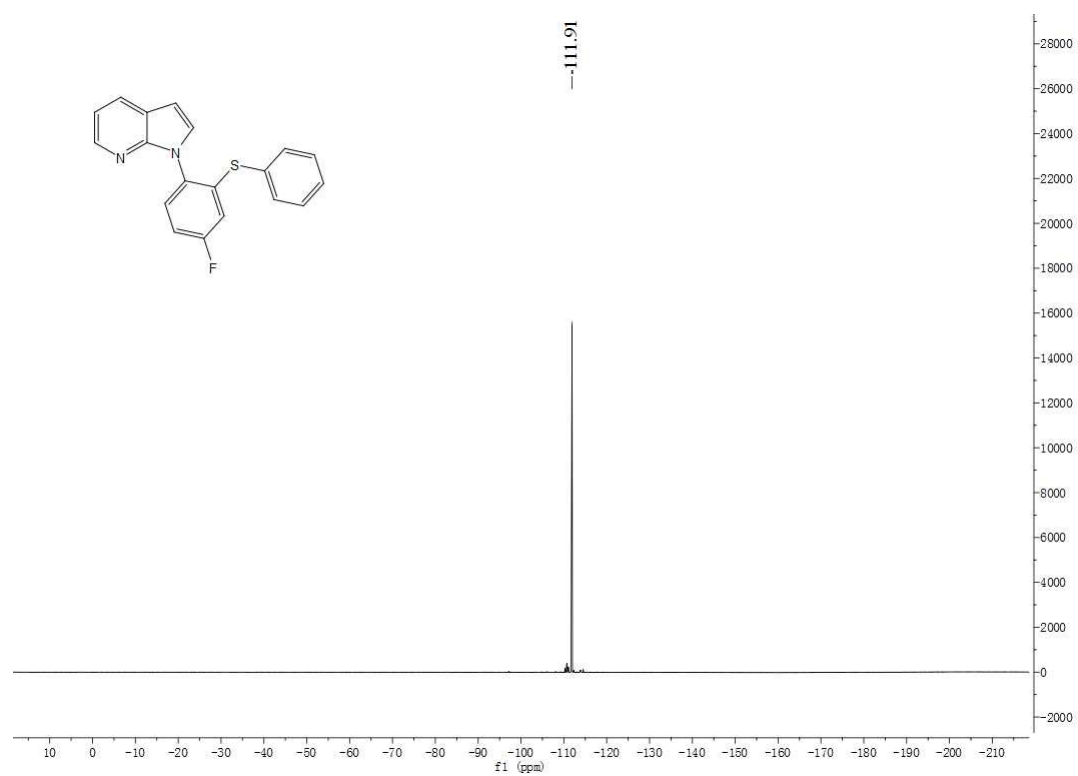

**<sup>1</sup>H NMR spectrum of 3f in CDCl<sub>3</sub>**

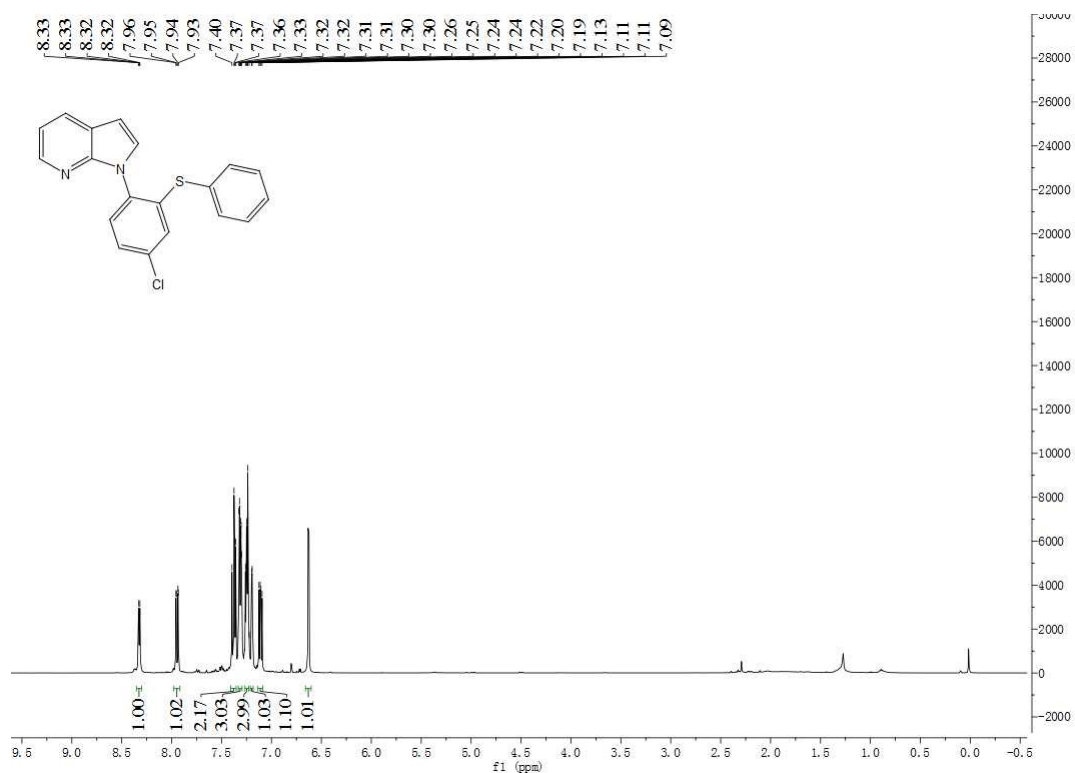

**<sup>13</sup>C NMR spectrum of 3f in CDCl<sub>3</sub>**

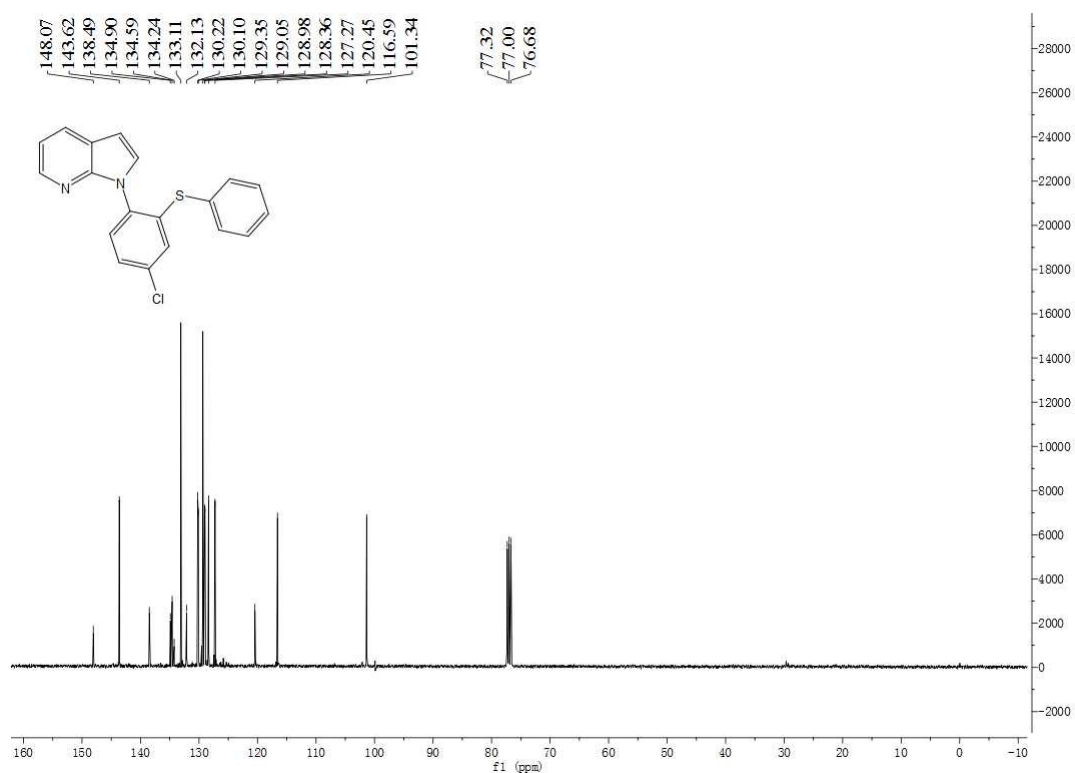

**<sup>1</sup>H NMR spectrum of 3g in CDCl<sub>3</sub>**

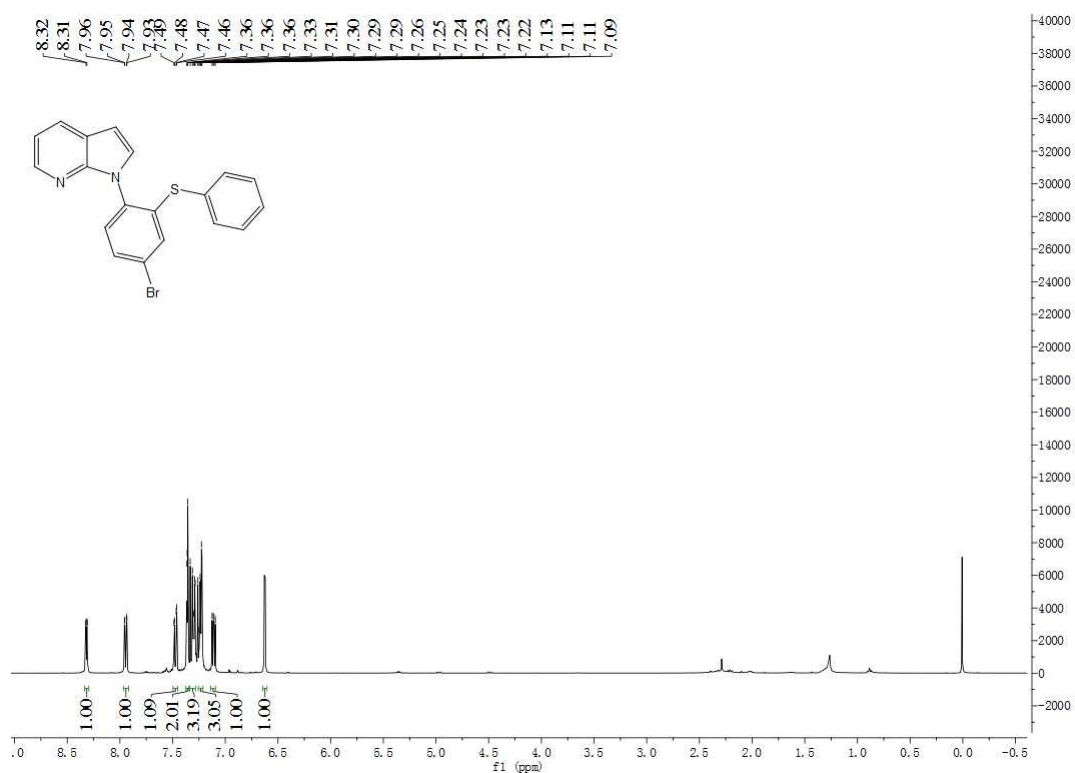

**<sup>13</sup>C NMR spectrum of 3g in CDCl<sub>3</sub>**

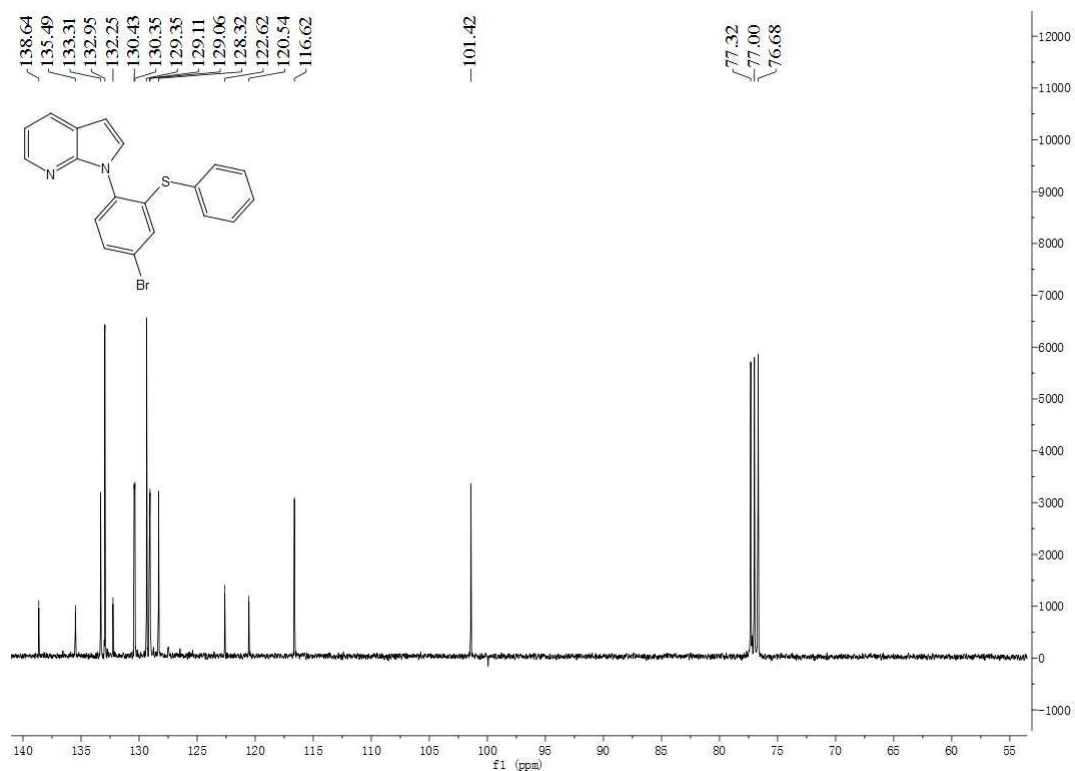

**<sup>1</sup>H NMR spectrum of 3h in CDCl<sub>3</sub>**

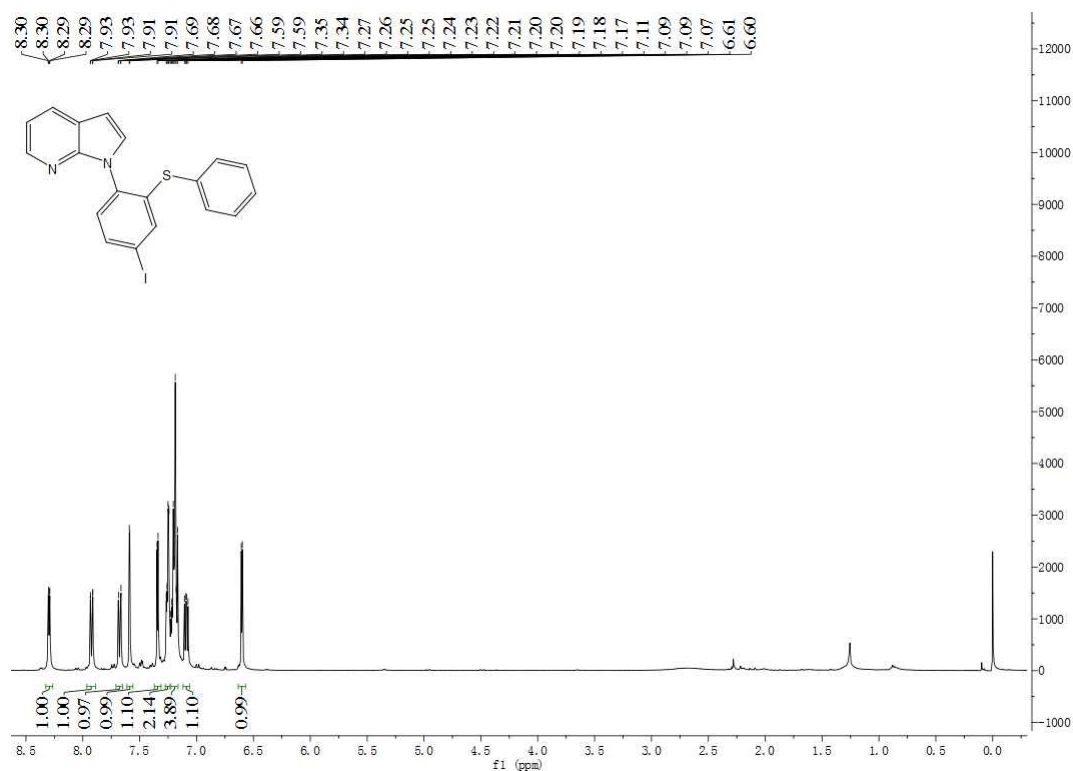

**<sup>13</sup>C NMR spectrum of 3h in CDCl<sub>3</sub>**

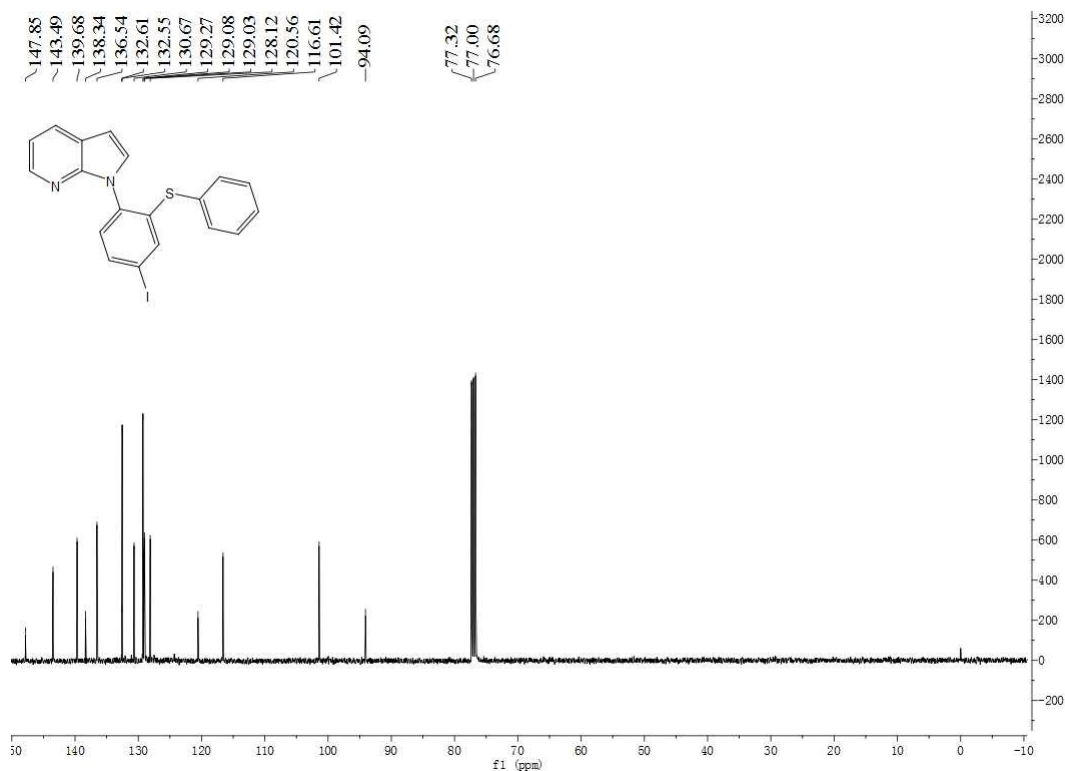

**<sup>1</sup>H NMR spectrum of 3i in CDCl<sub>3</sub>**

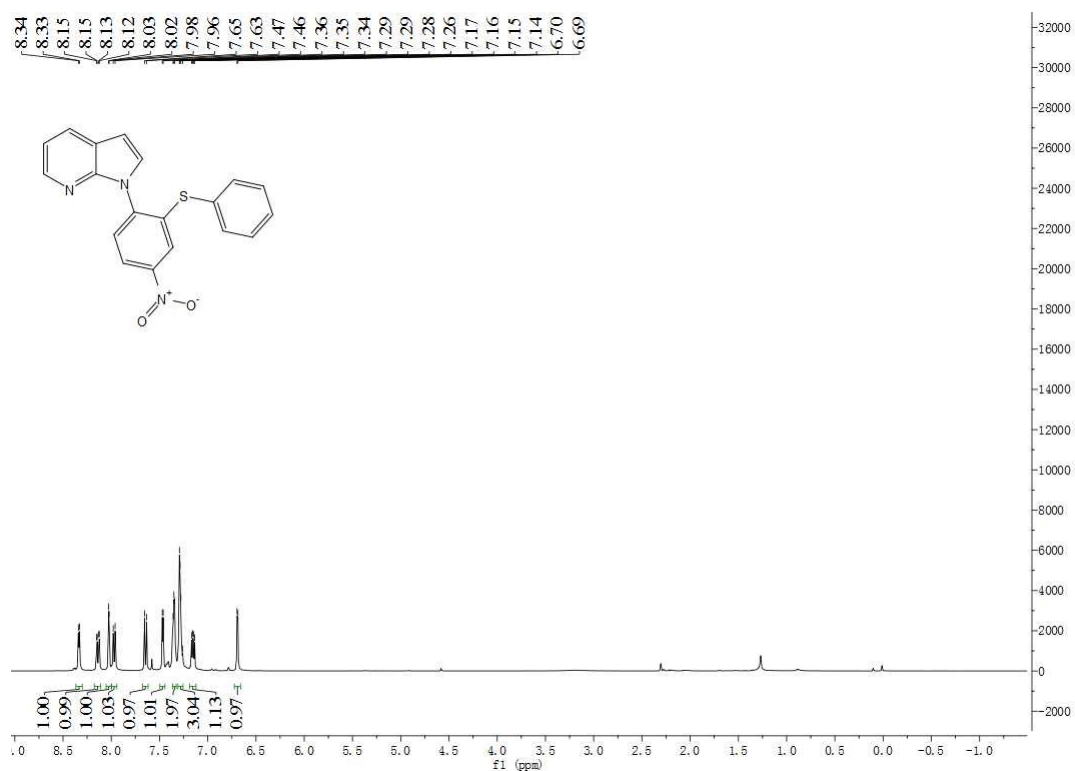

**<sup>13</sup>C NMR spectrum of 3i in CDCl<sub>3</sub>**

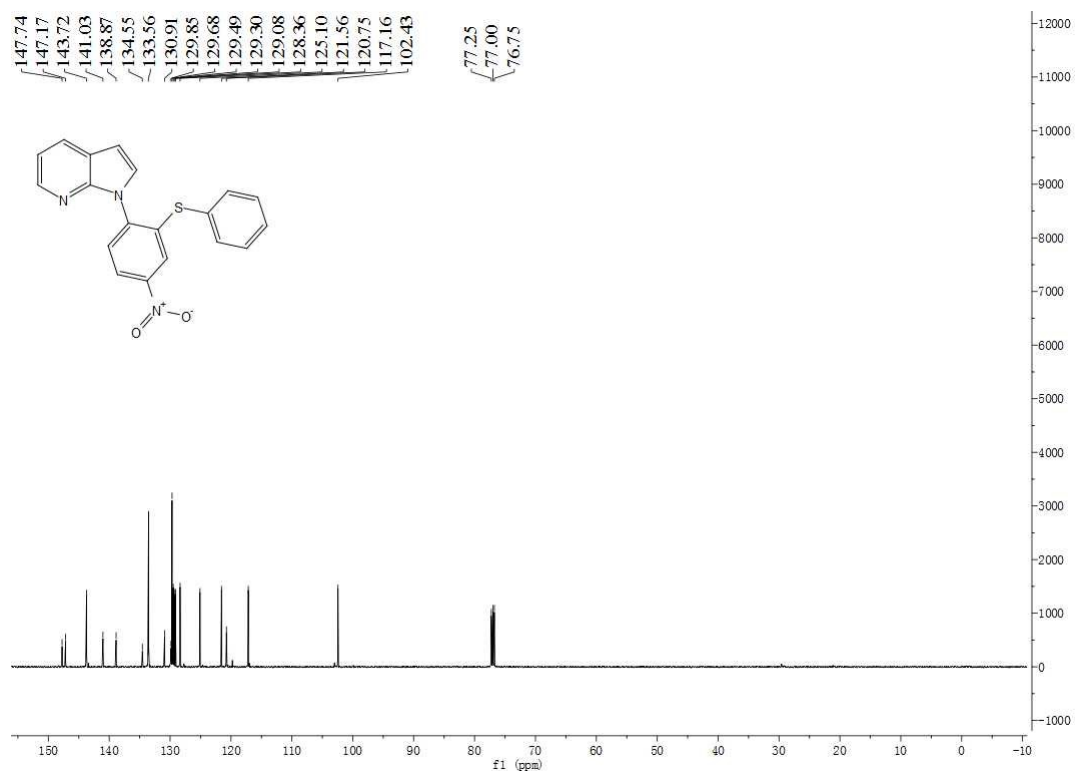

**<sup>1</sup>H NMR spectrum of 3j in CDCl<sub>3</sub>**

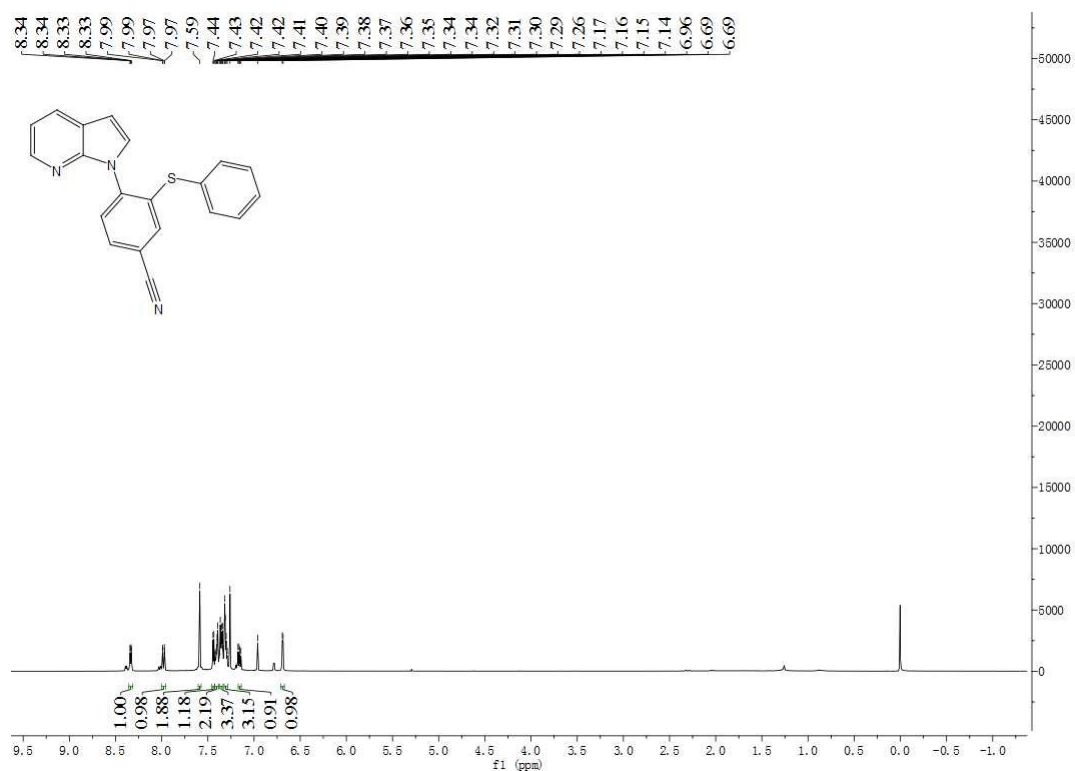

**<sup>13</sup>C NMR spectrum of 3j in CDCl<sub>3</sub>**

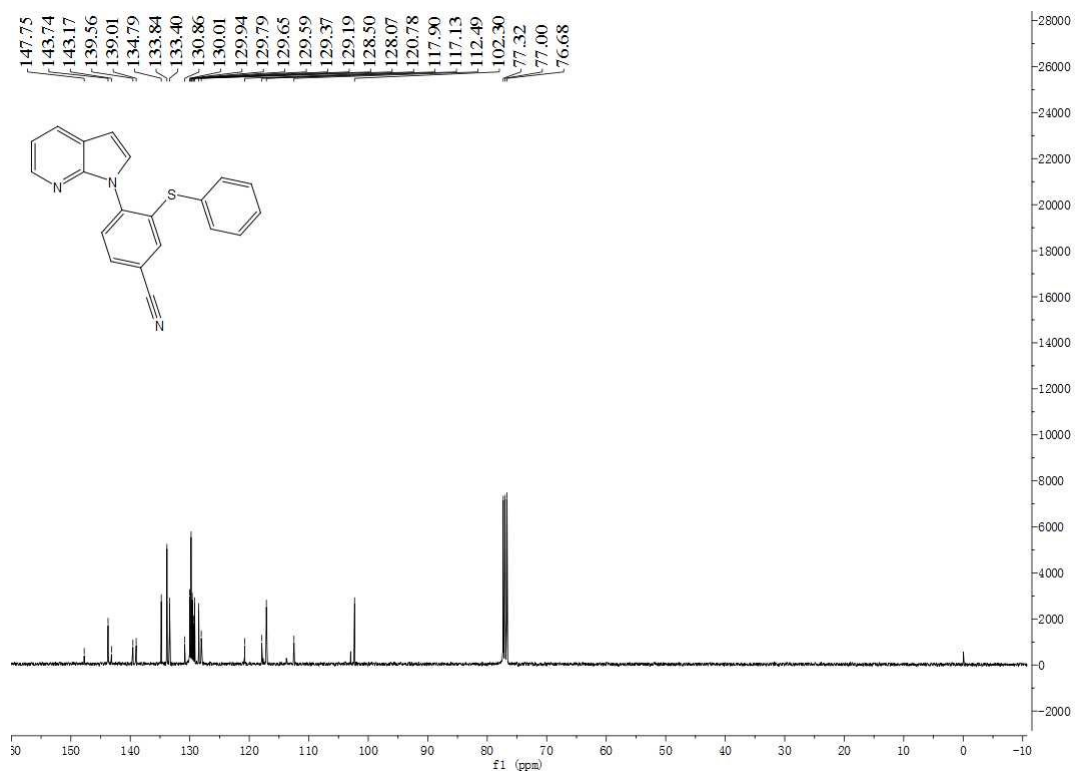

**<sup>1</sup>H NMR spectrum of 3k in CDCl<sub>3</sub>**

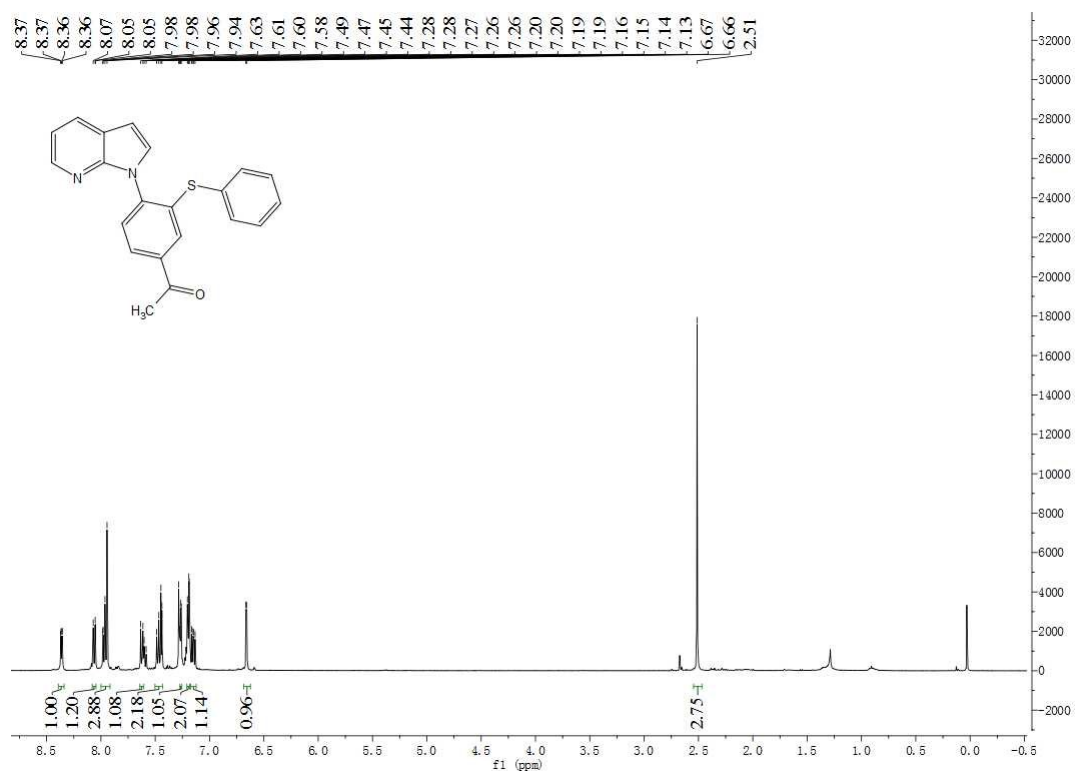

**<sup>13</sup>C NMR spectrum of 3k in CDCl<sub>3</sub>**

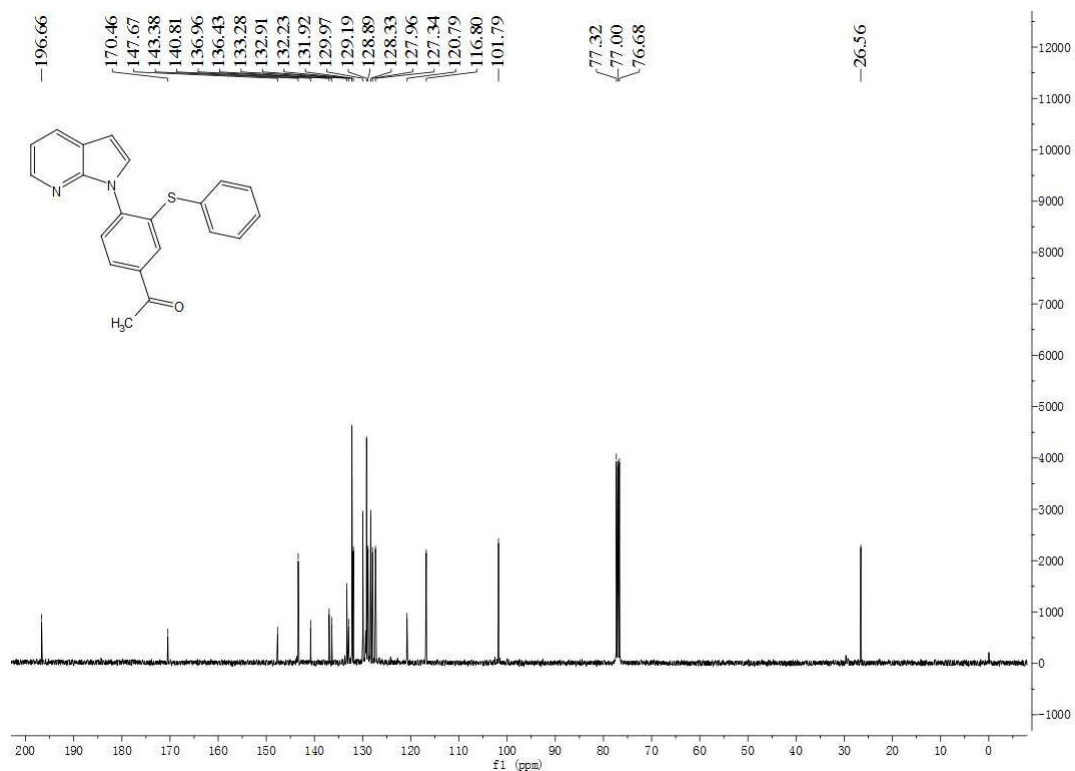

**<sup>1</sup>H NMR spectrum of 3I in CDCl<sub>3</sub>**

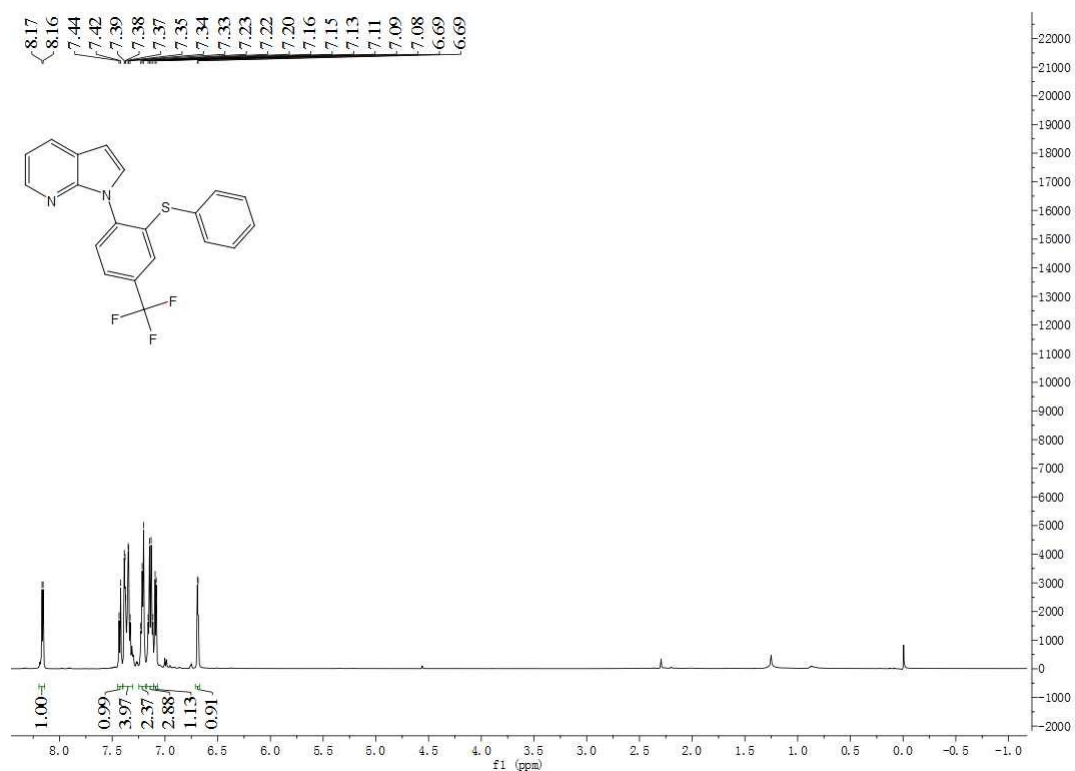

**<sup>13</sup>C NMR spectrum of 3I in CDCl<sub>3</sub>**

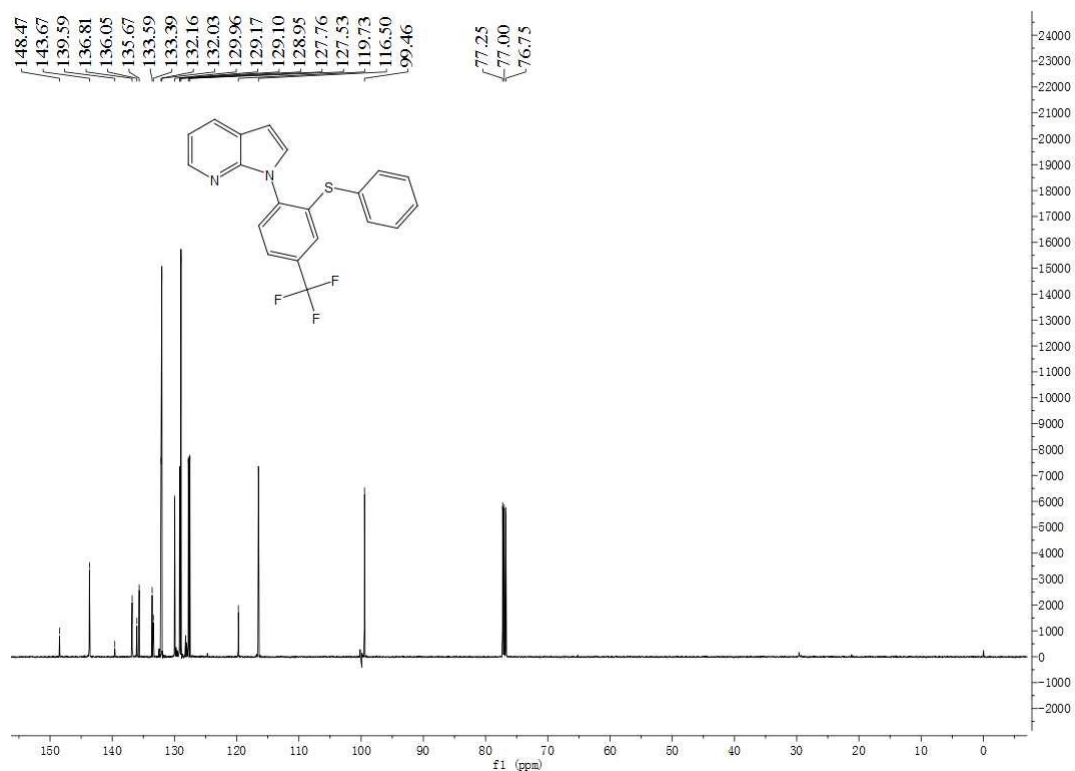

**$^{19}\text{F}$  NMR spectrum of 3l in  $\text{CDCl}_3$**

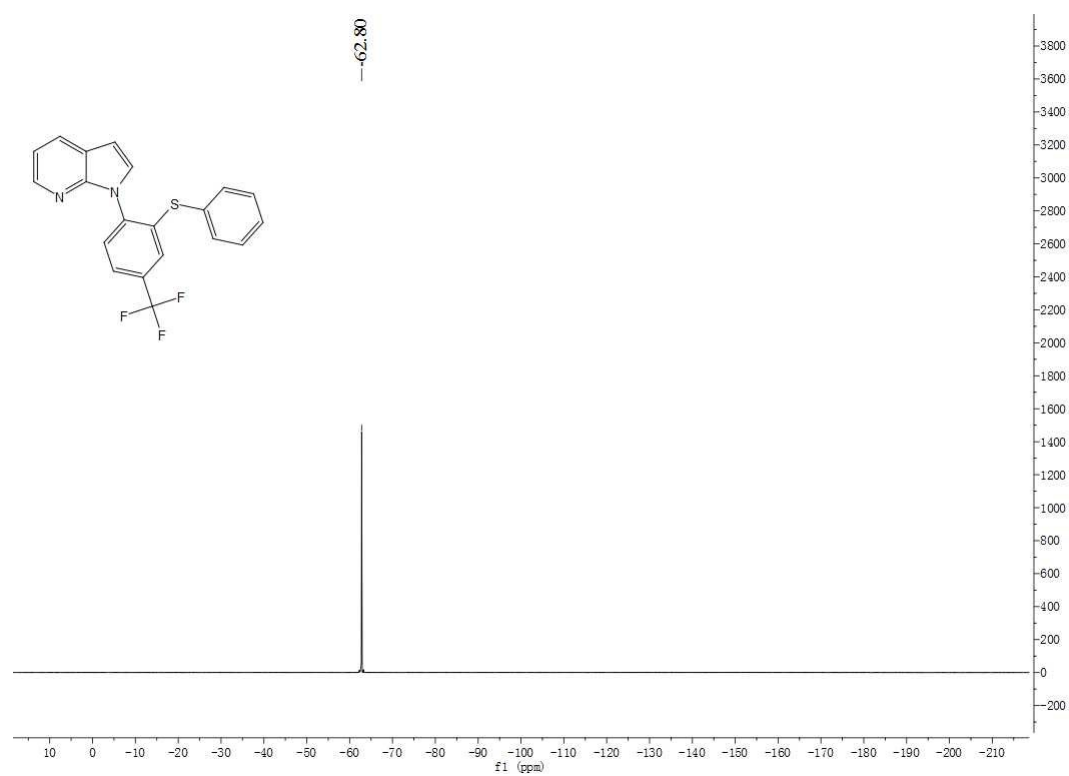

**<sup>1</sup>H NMR spectrum of 3m in CDCl<sub>3</sub>**

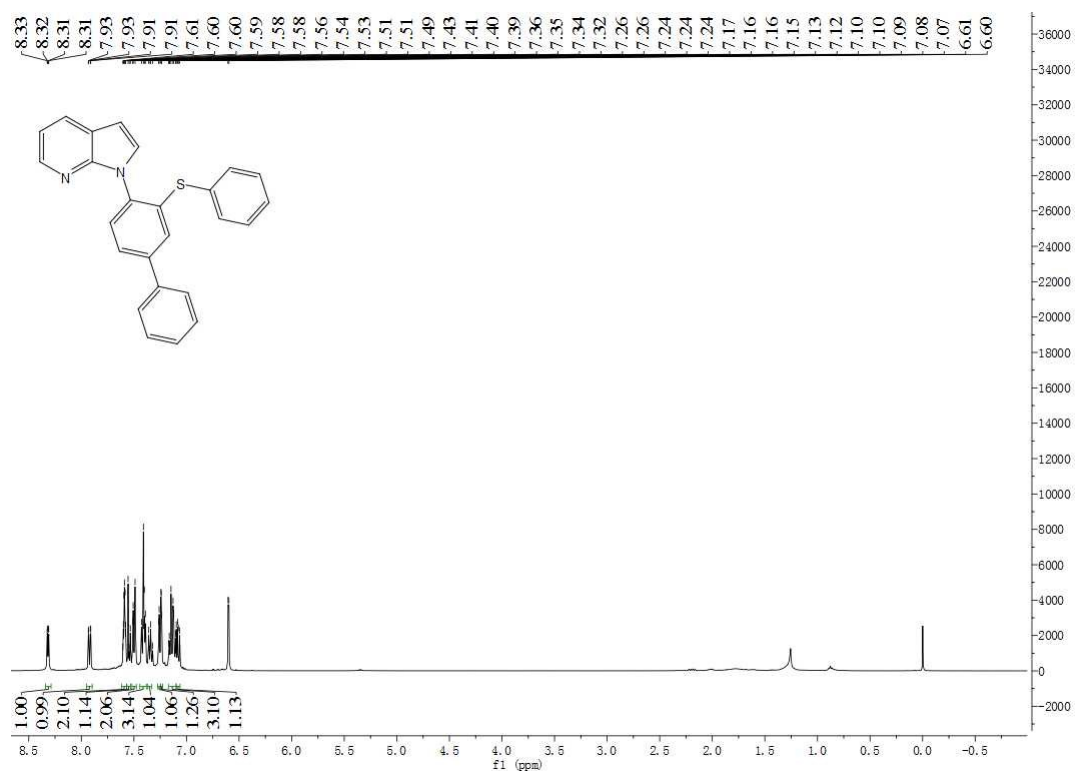

**<sup>13</sup>C NMR spectrum of 3m in CDCl<sub>3</sub>**

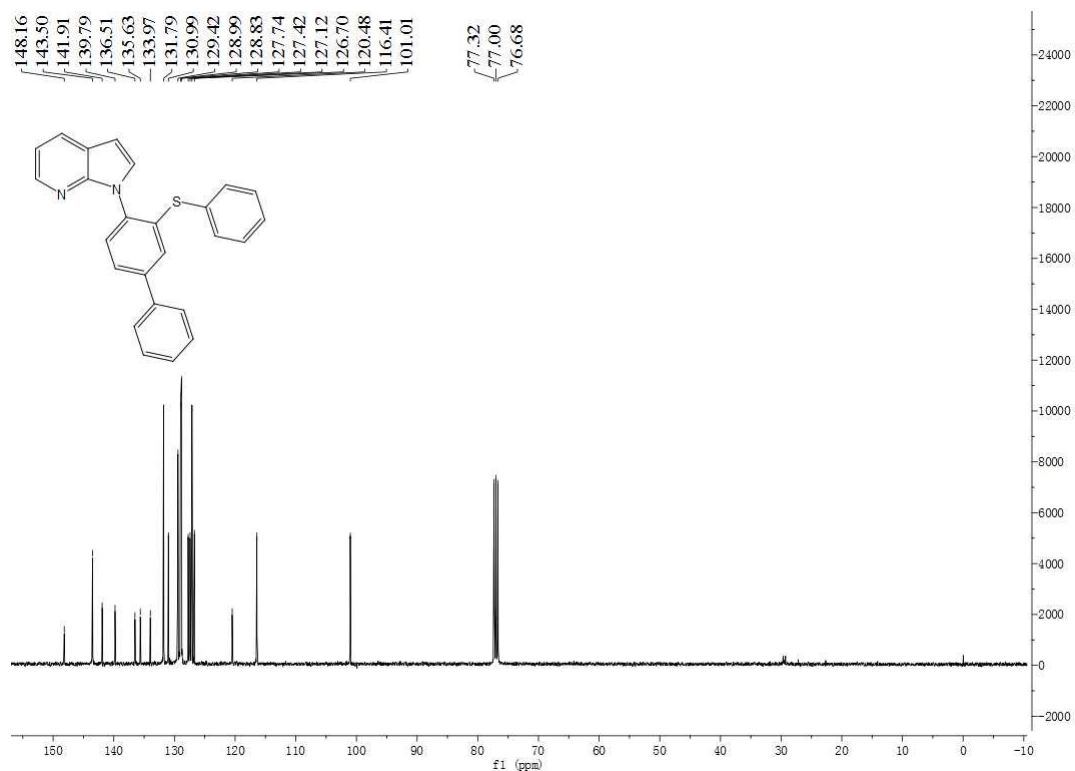

**<sup>1</sup>H NMR spectrum of 3n in CDCl<sub>3</sub>**

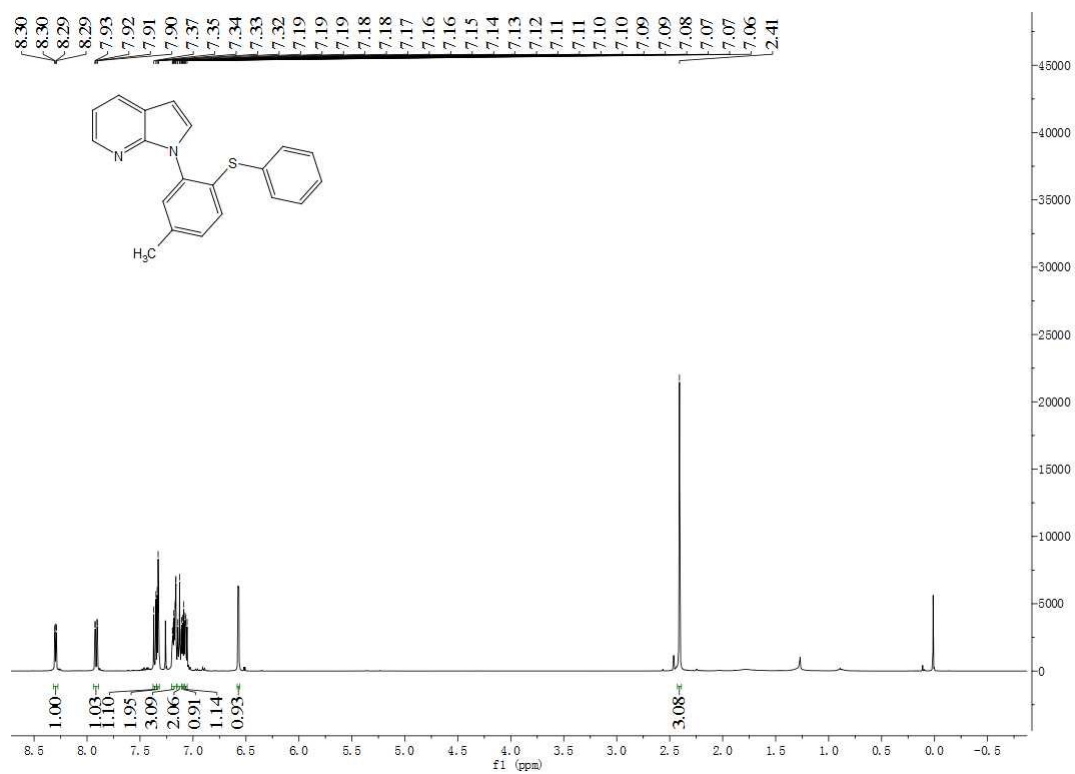

**<sup>13</sup>C NMR spectrum of 3n in CDCl<sub>3</sub>**

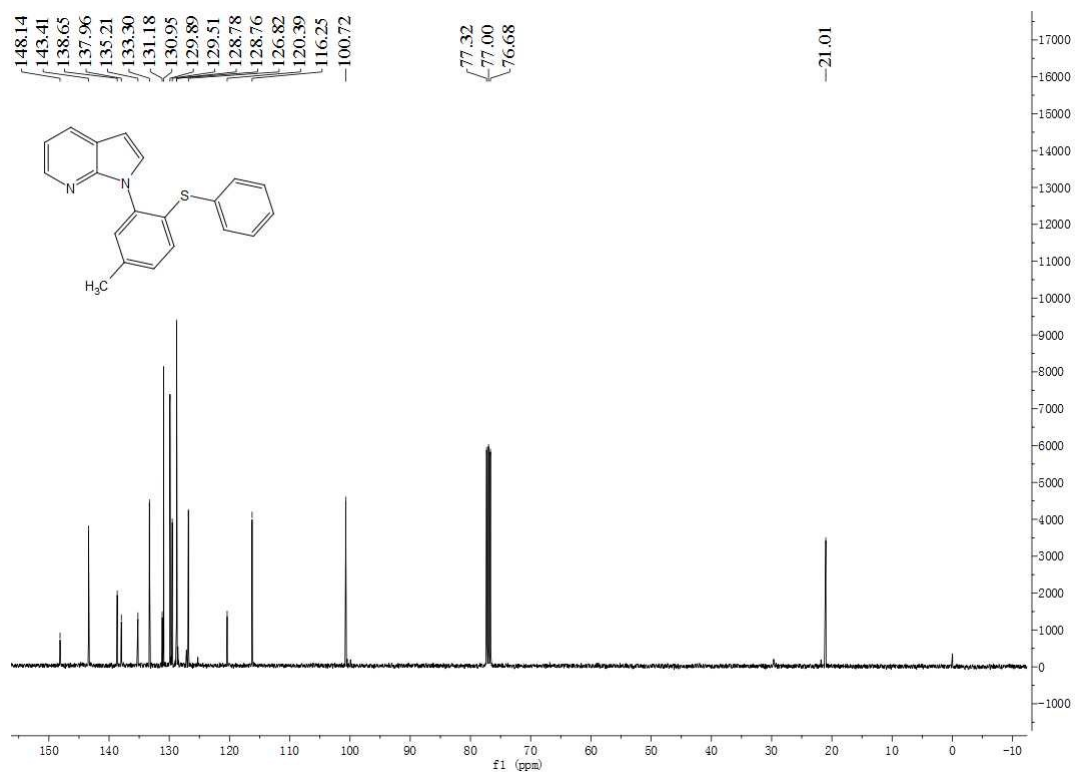

**<sup>1</sup>H NMR spectrum of 3o in CDCl<sub>3</sub>**

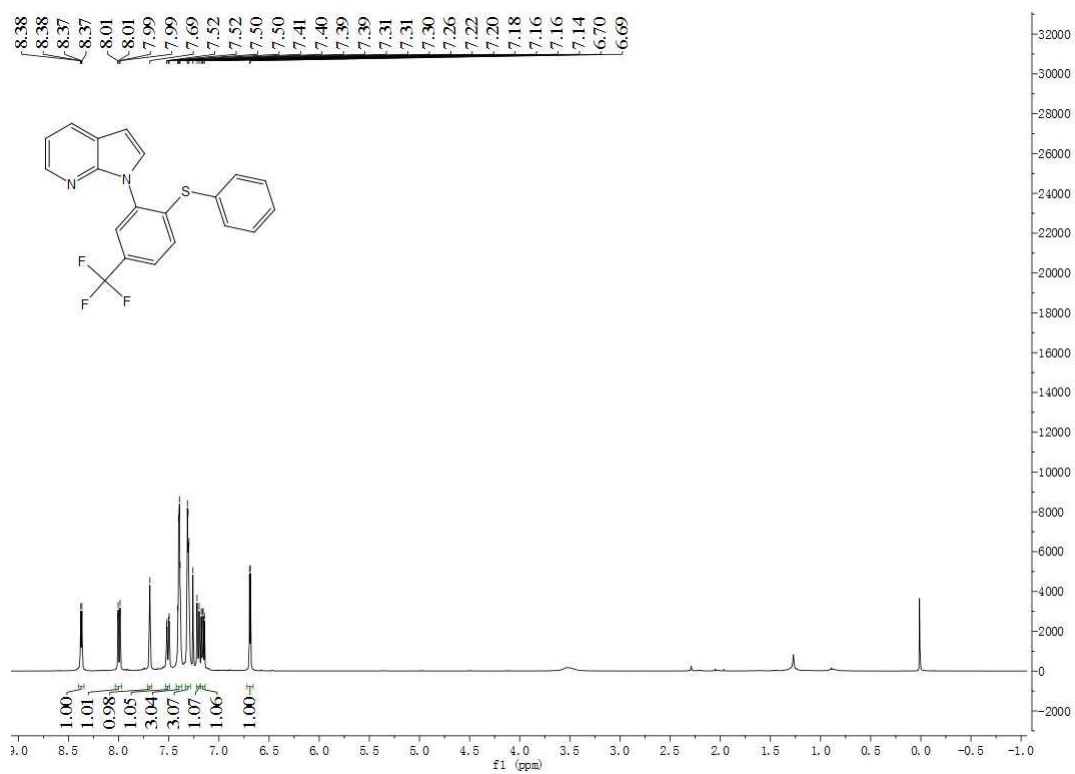

**<sup>13</sup>C NMR spectrum of 3o in CDCl<sub>3</sub>**

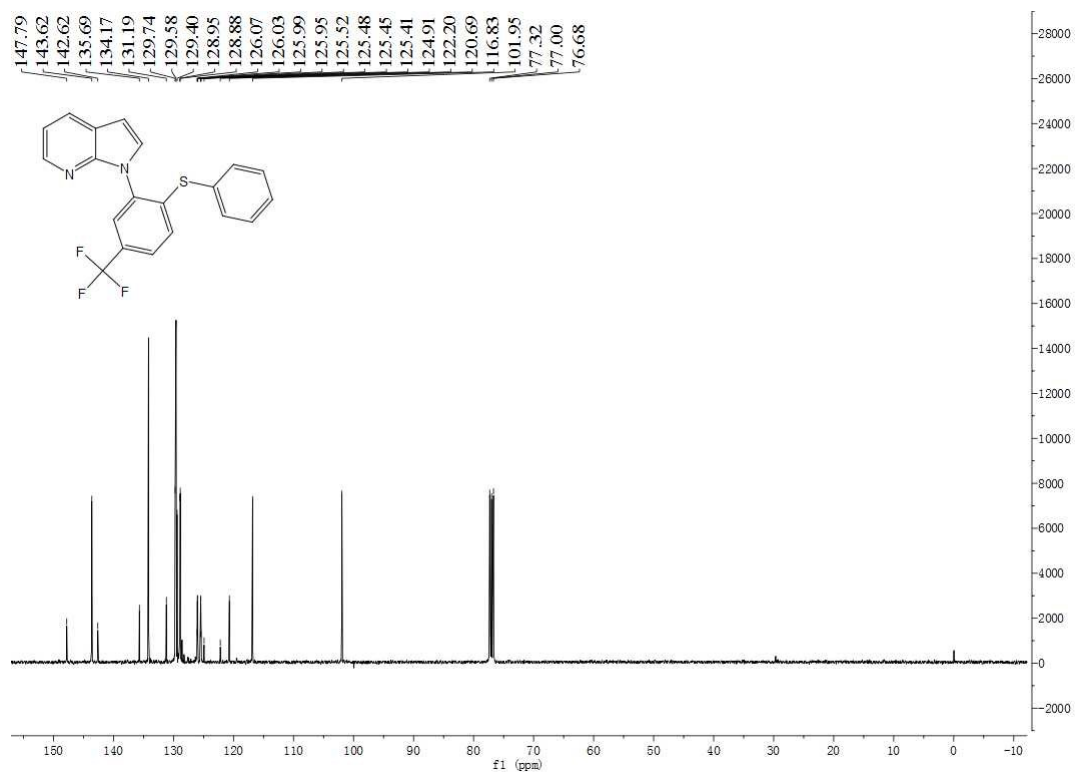

**$^{19}\text{F}$  NMR spectrum of 3o in  $\text{CDCl}_3$**

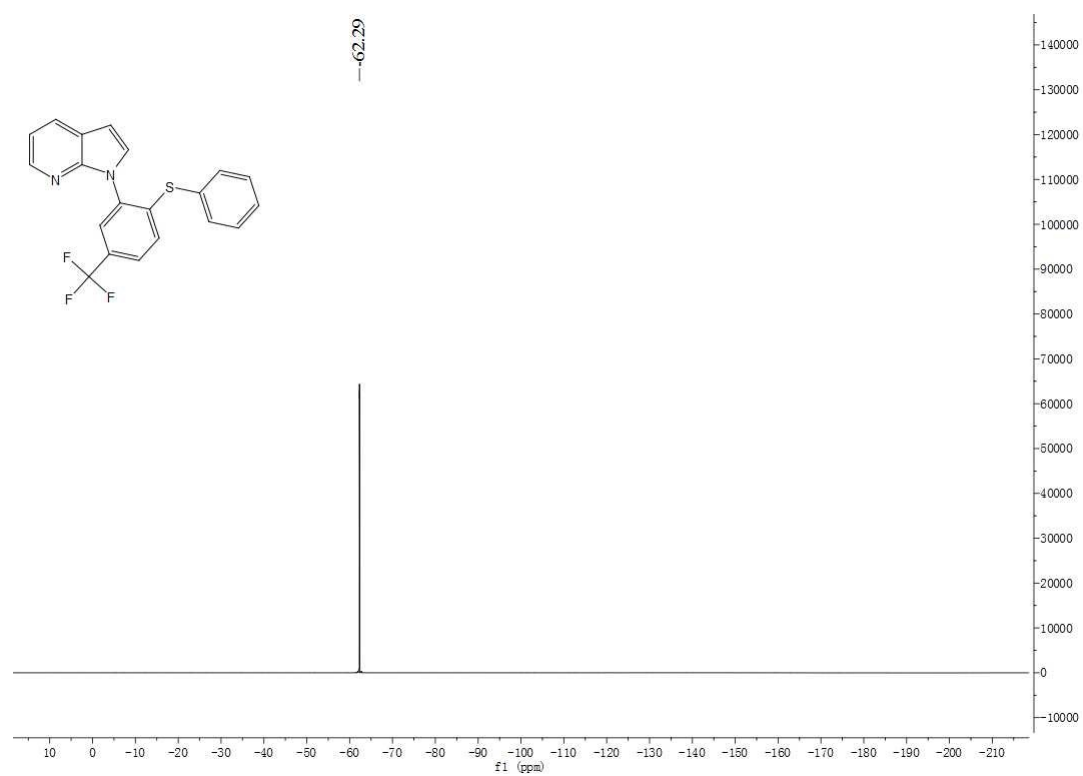

**<sup>1</sup>H NMR spectrum of 3p in CDCl<sub>3</sub>**

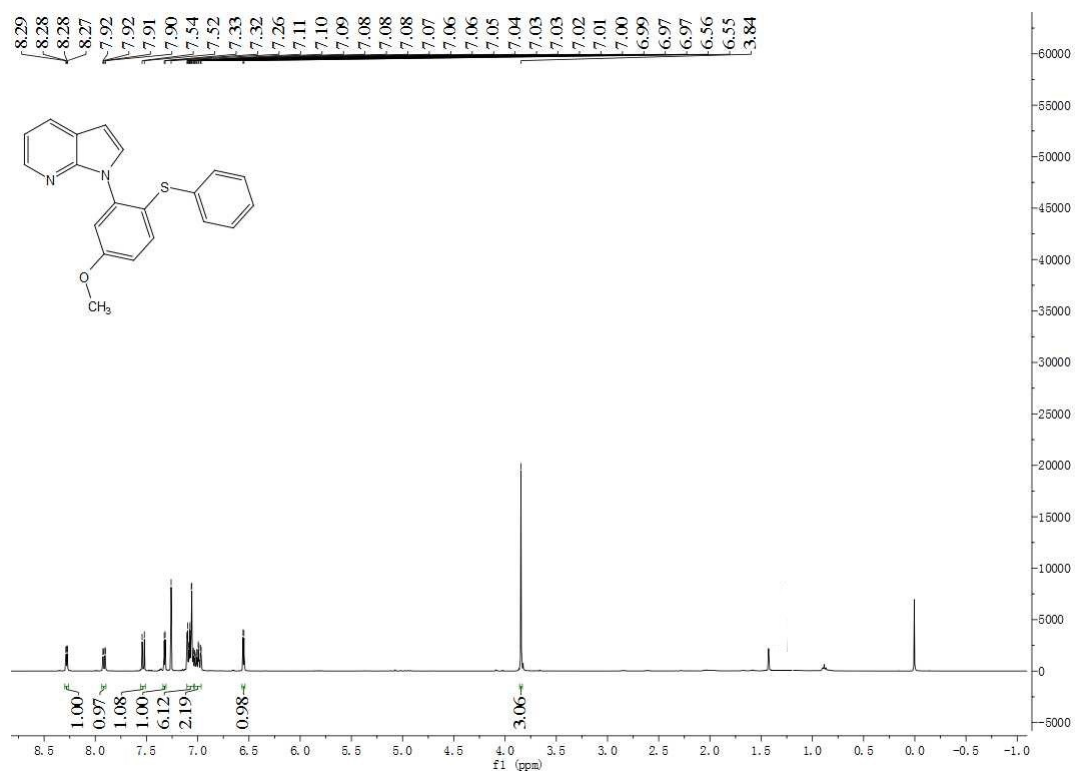

**<sup>13</sup>C NMR spectrum of 3p in CDCl<sub>3</sub>**

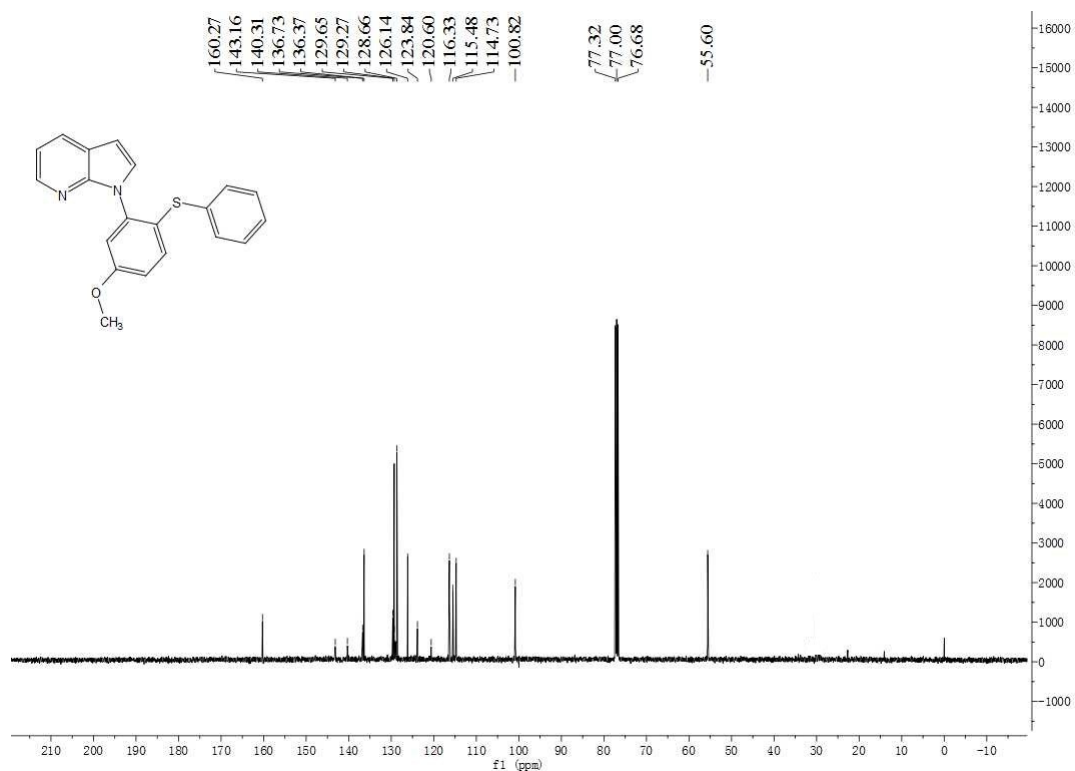

**<sup>1</sup>H NMR spectrum of 3q in CDCl<sub>3</sub>**

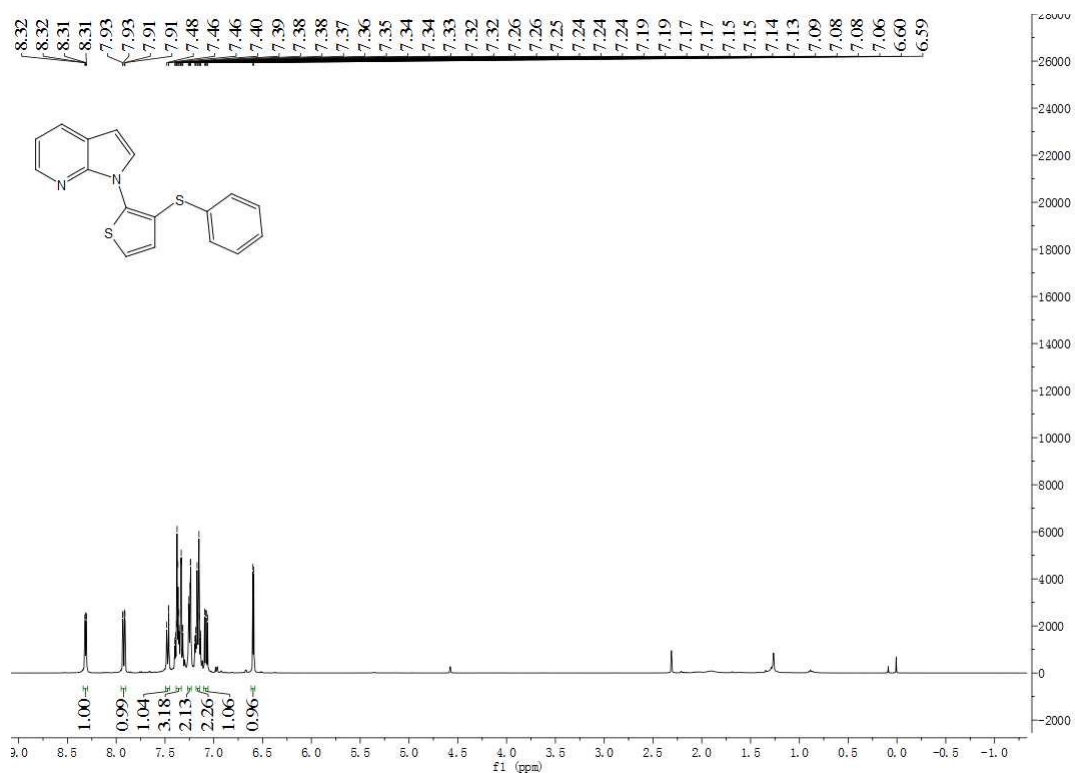

**<sup>13</sup>C NMR spectrum of 3q in CDCl<sub>3</sub>**

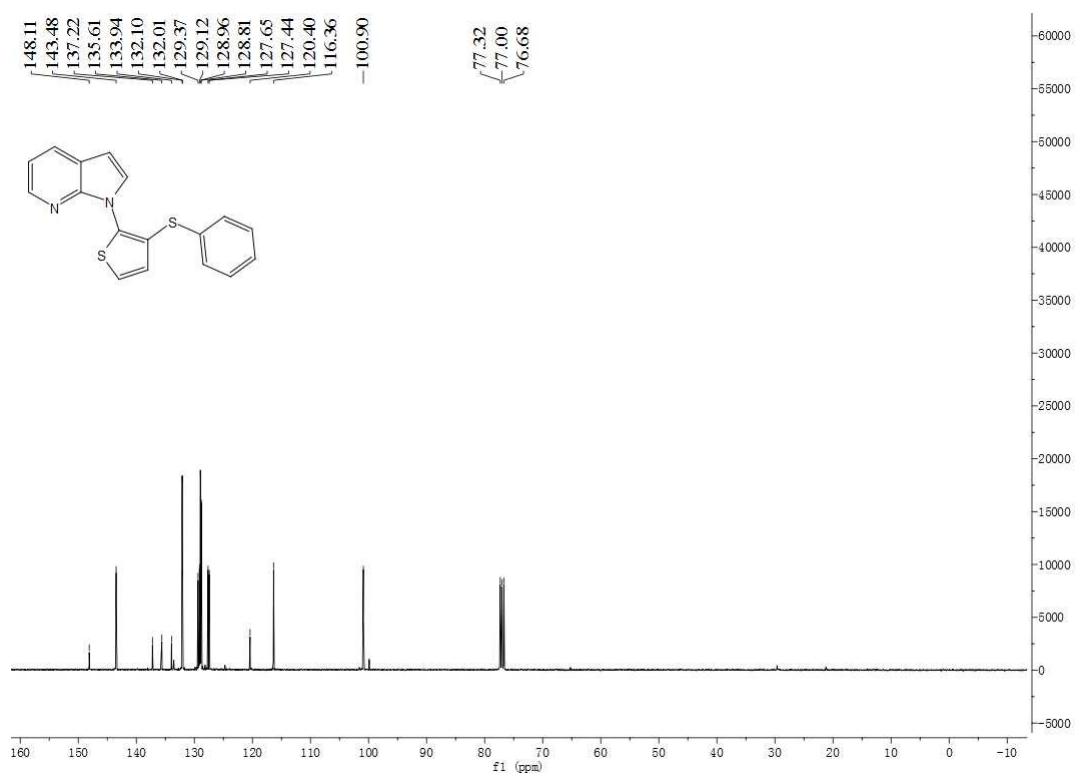

**<sup>1</sup>H NMR spectrum of 3r in CDCl<sub>3</sub>**

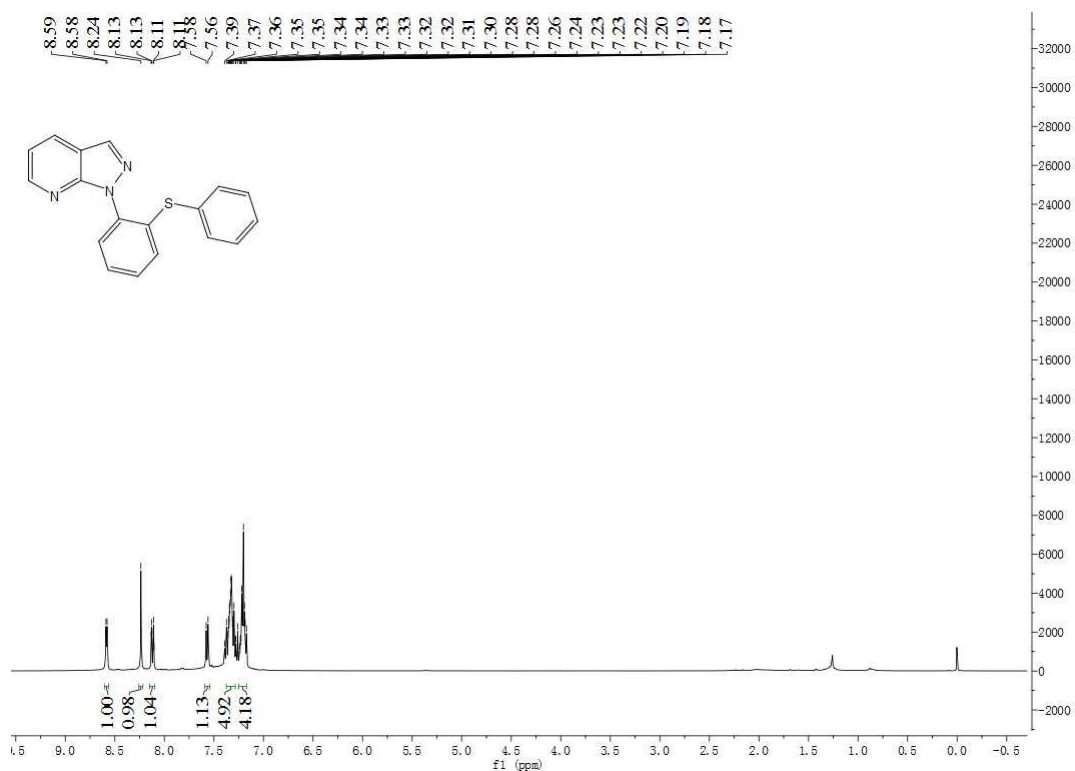

**<sup>13</sup>C NMR spectrum of 3r in CDCl<sub>3</sub>**

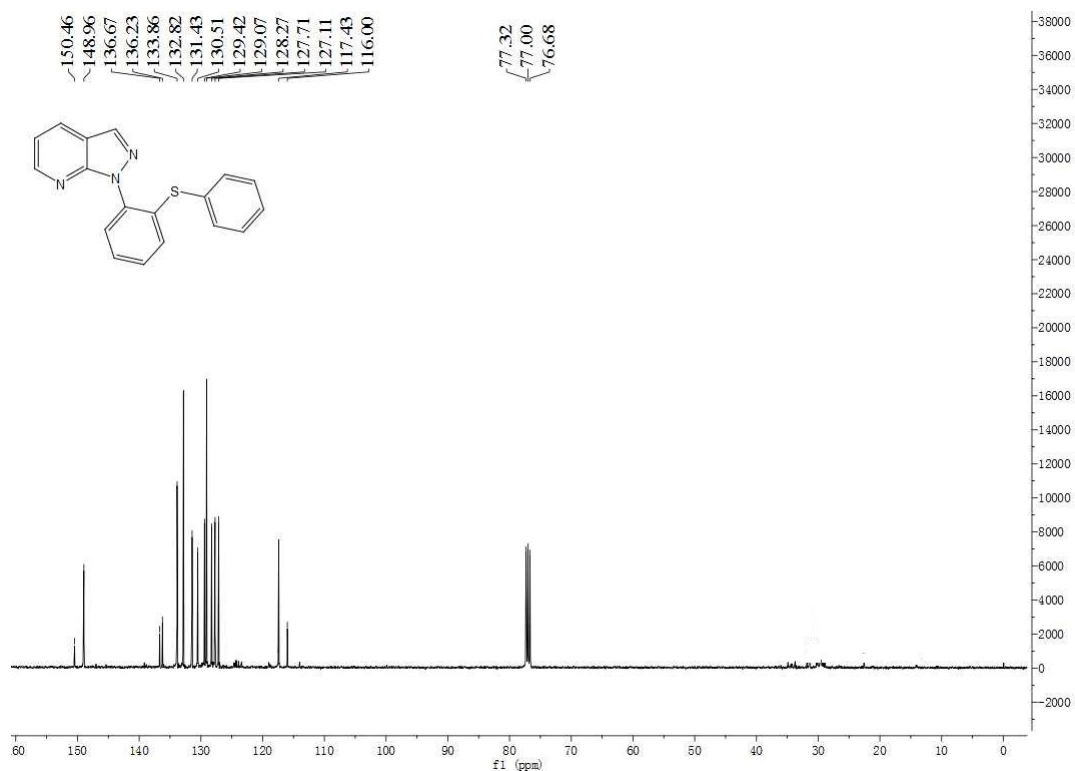

**<sup>1</sup>H NMR spectrum of 3s in CDCl<sub>3</sub>**

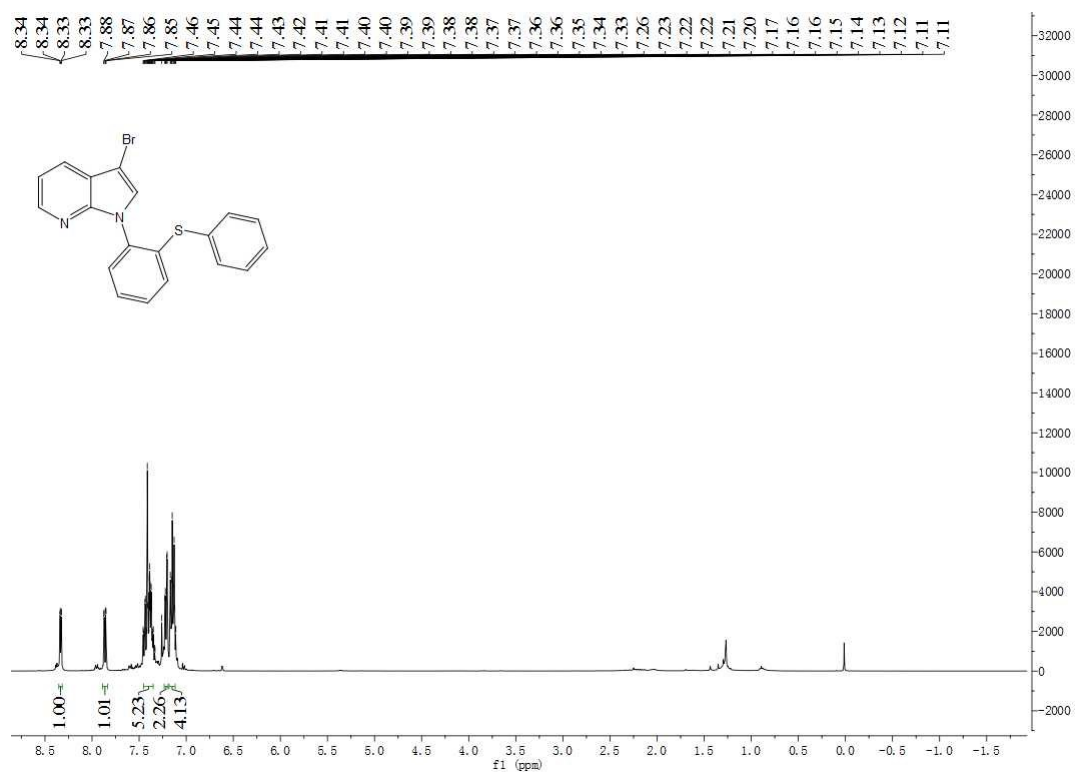

**<sup>13</sup>C NMR spectrum of 3s in CDCl<sub>3</sub>**

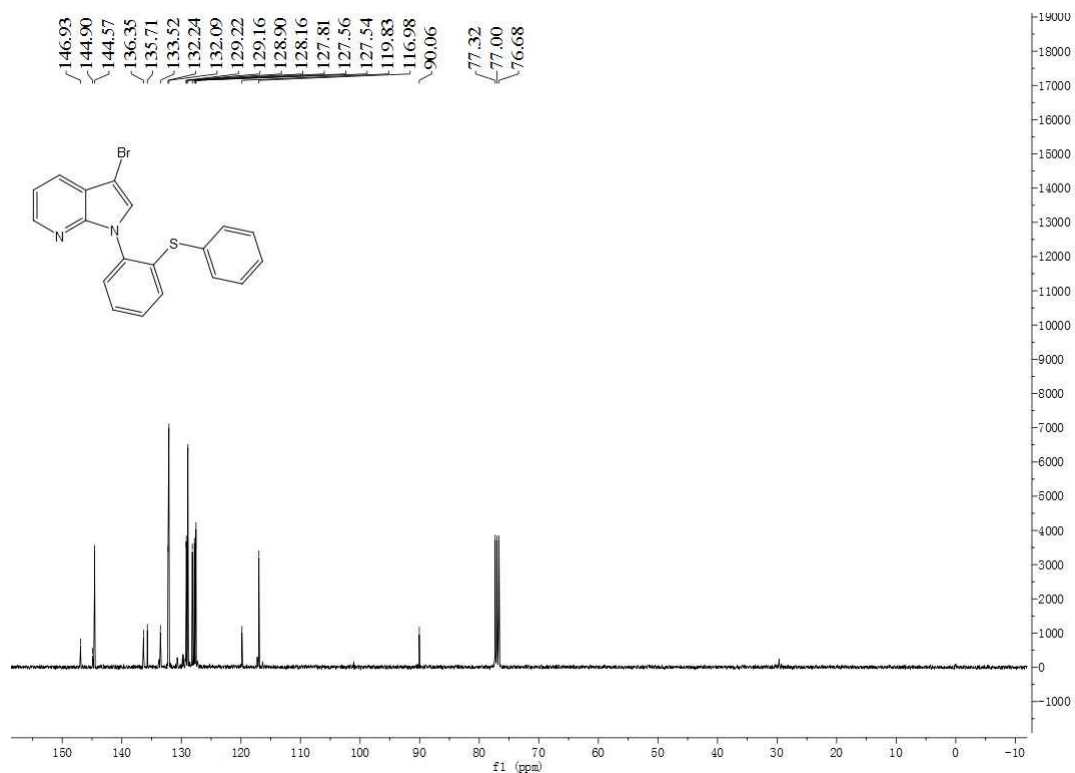

**<sup>1</sup>H NMR spectrum of 3t in CDCl<sub>3</sub>**

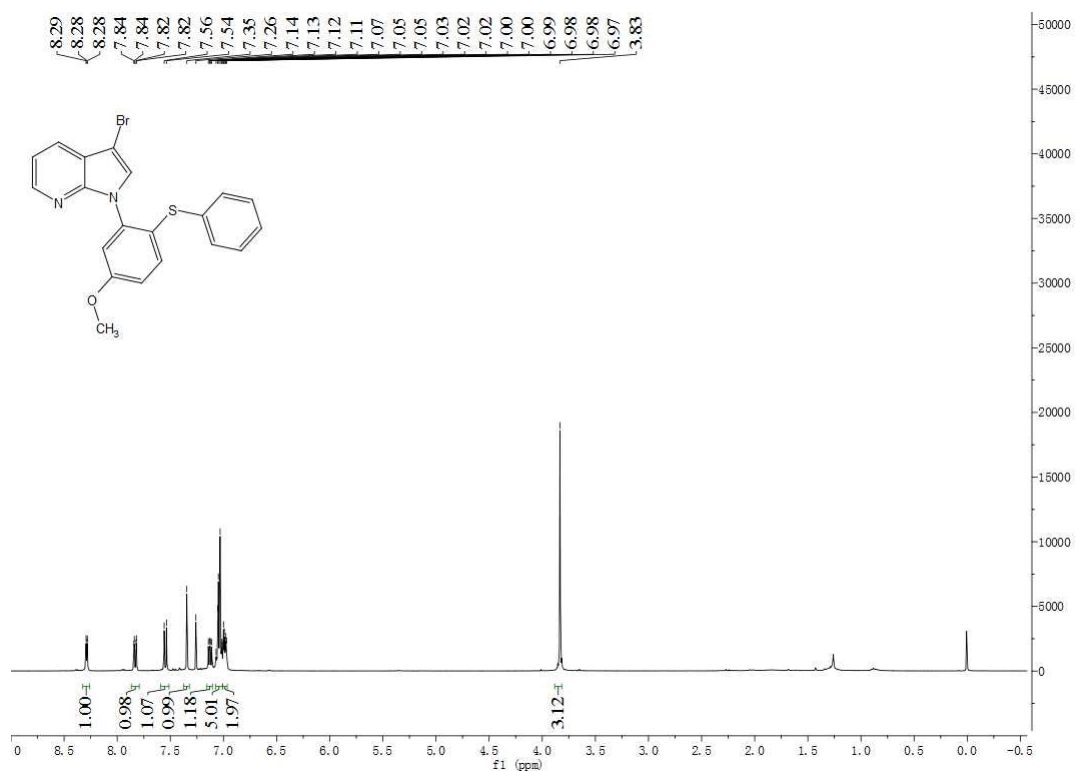

**<sup>13</sup>C NMR spectrum of 3t in CDCl<sub>3</sub>**

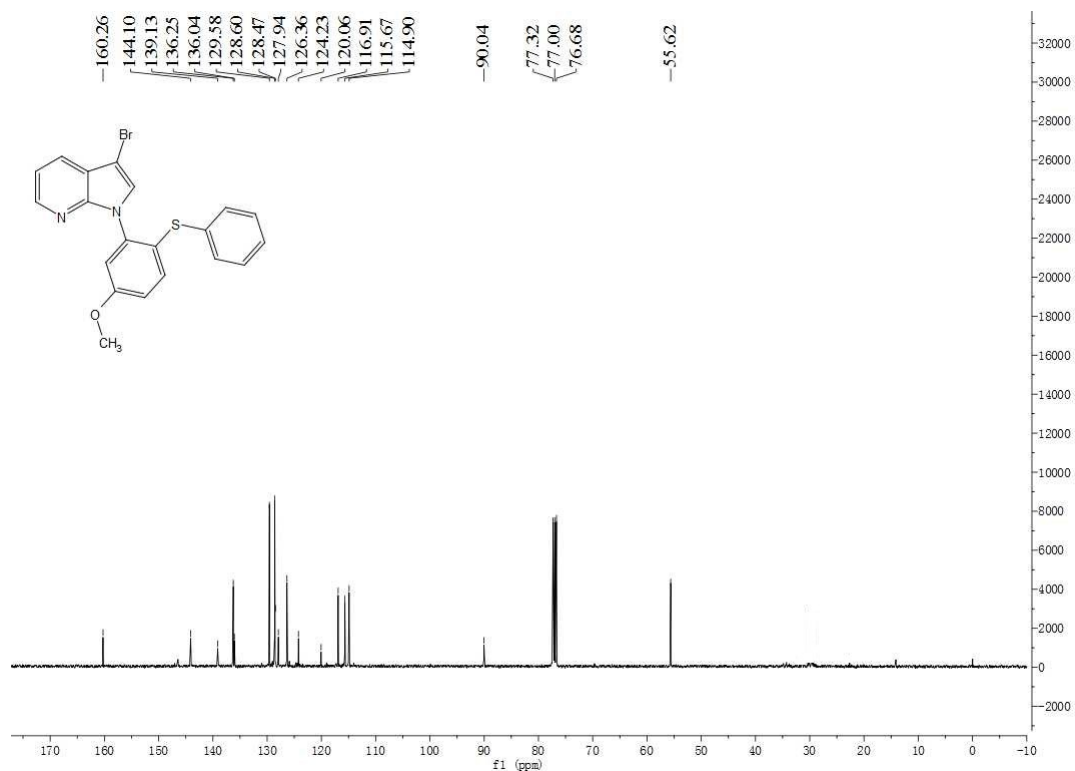

**<sup>1</sup>H NMR spectrum of 3u in CDCl<sub>3</sub>**

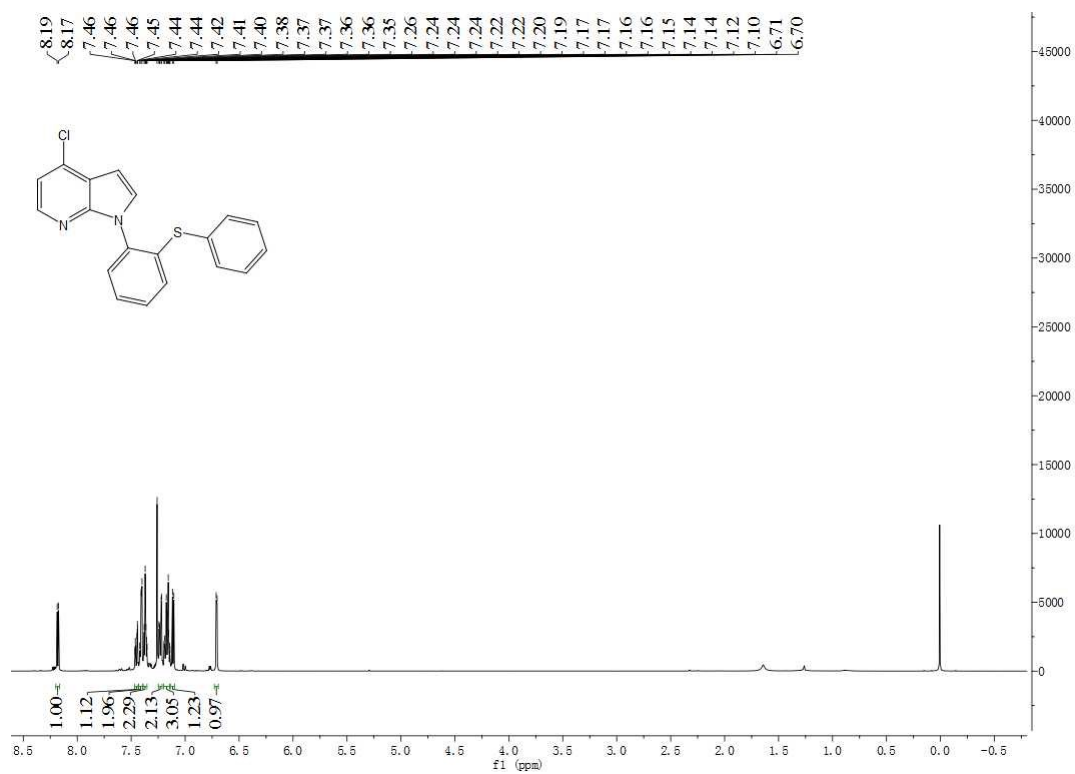

**<sup>13</sup>C NMR spectrum of 3u in CDCl<sub>3</sub>**

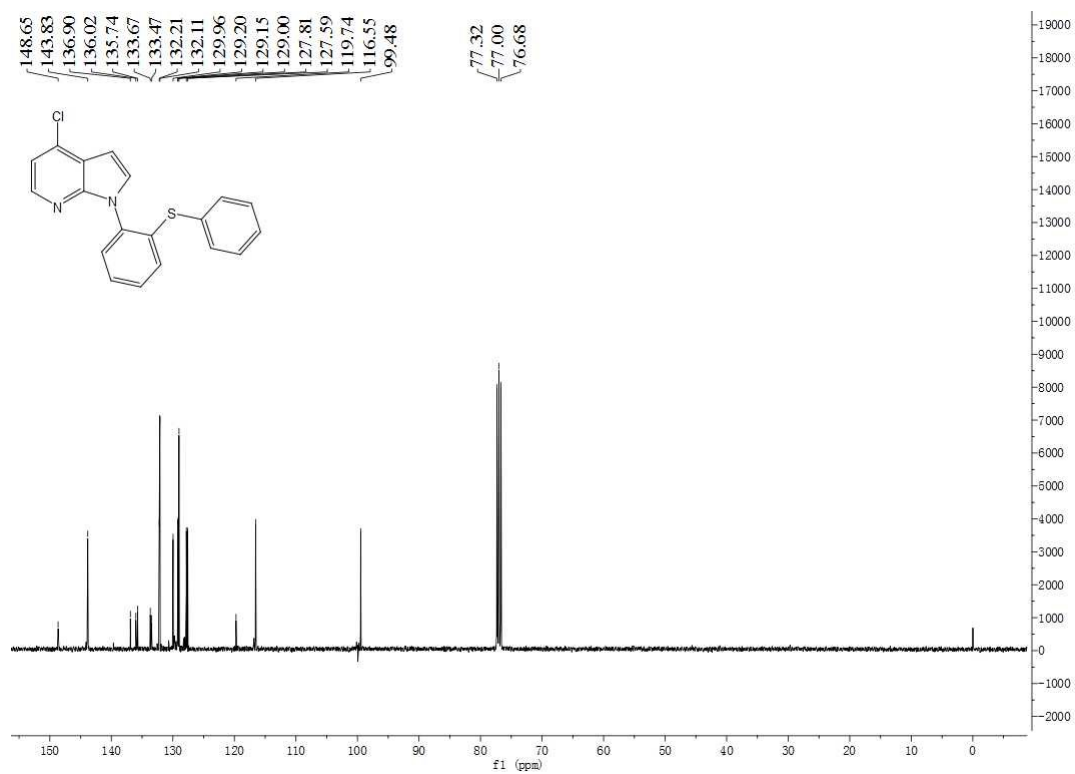

**<sup>1</sup>H NMR spectrum of 3v in CDCl<sub>3</sub>**

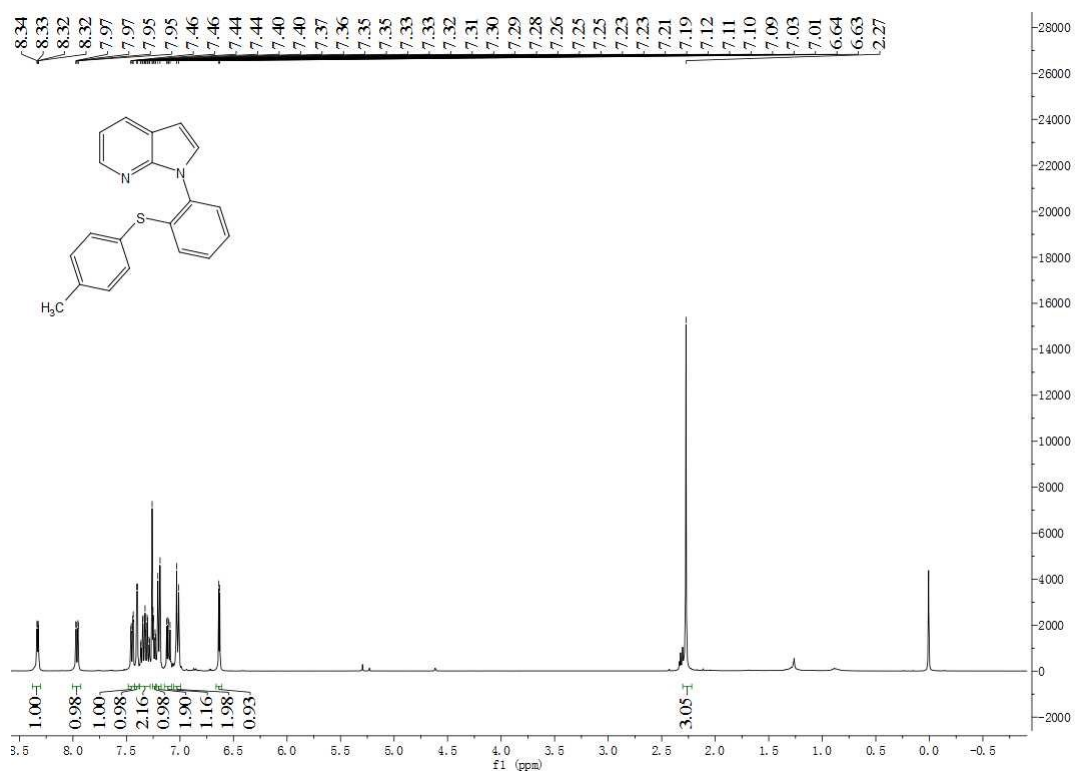

**<sup>13</sup>C NMR spectrum of 3v in CDCl<sub>3</sub>**

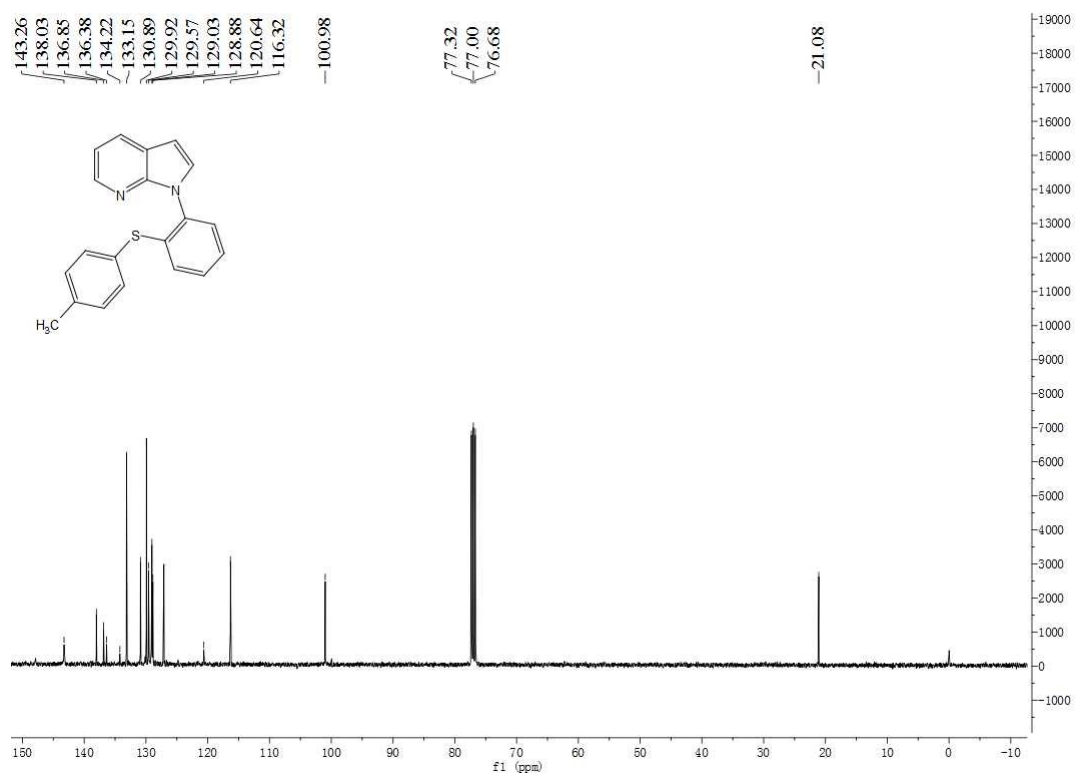

**<sup>1</sup>H NMR spectrum of 3w in CDCl<sub>3</sub>**

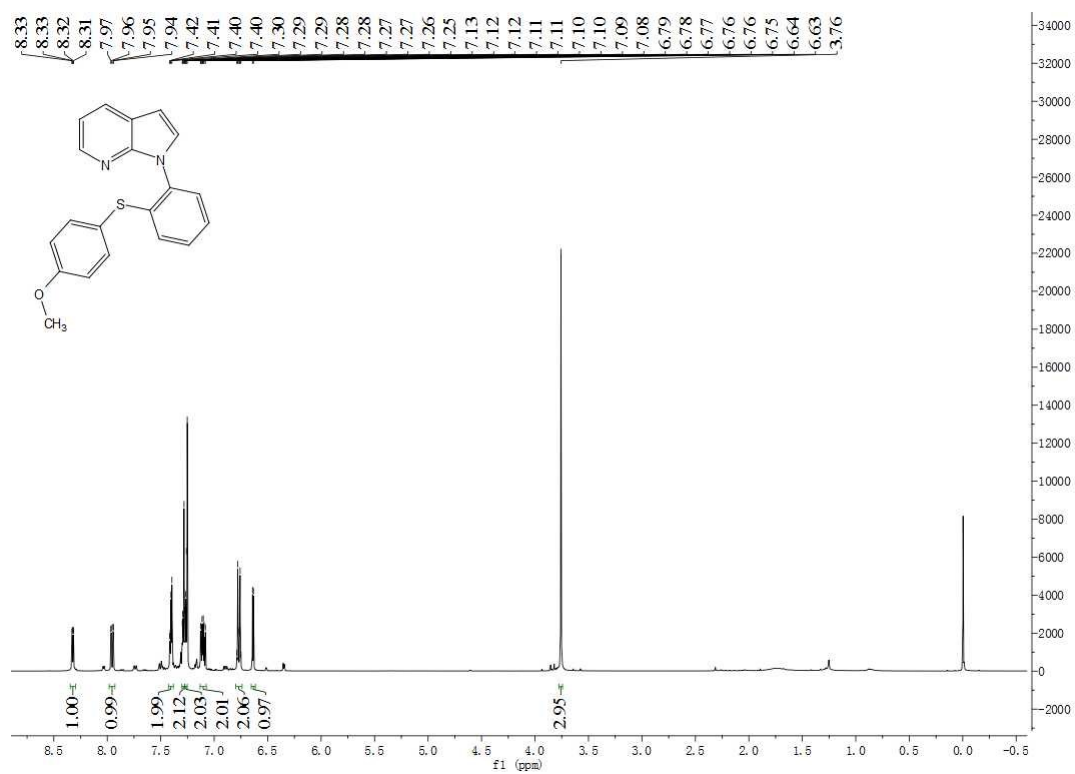

**<sup>13</sup>C NMR spectrum of 3w in CDCl<sub>3</sub>**

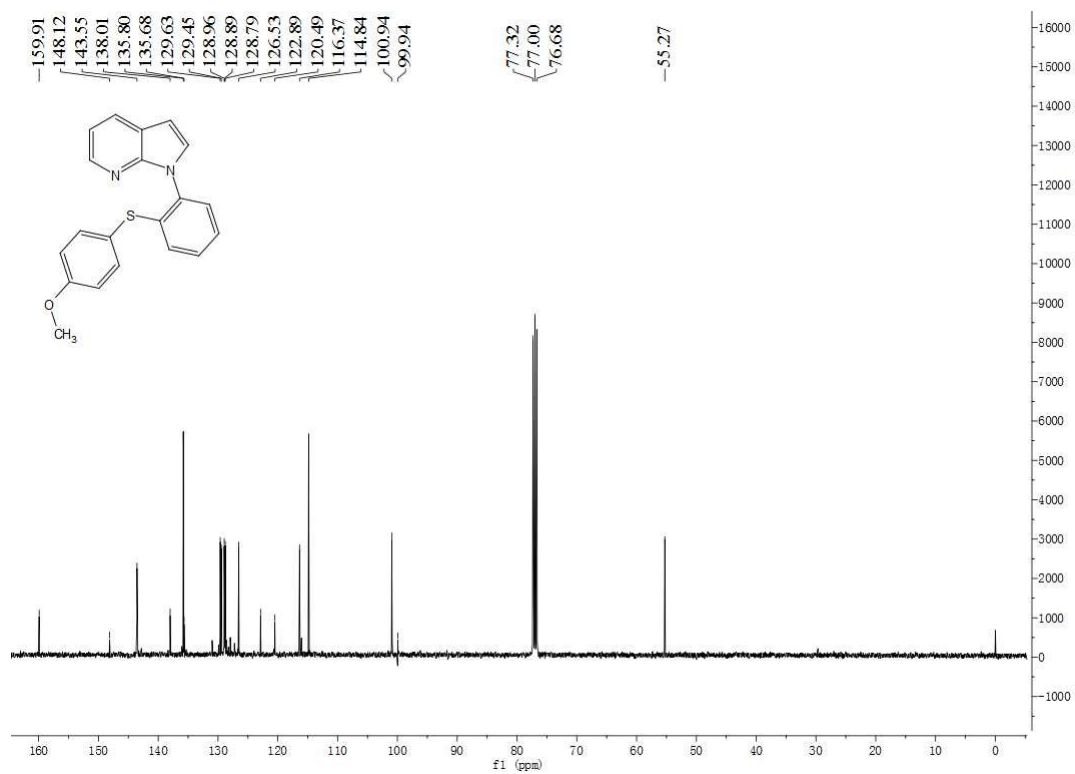

**<sup>1</sup>H NMR spectrum of 3x in CDCl<sub>3</sub>**

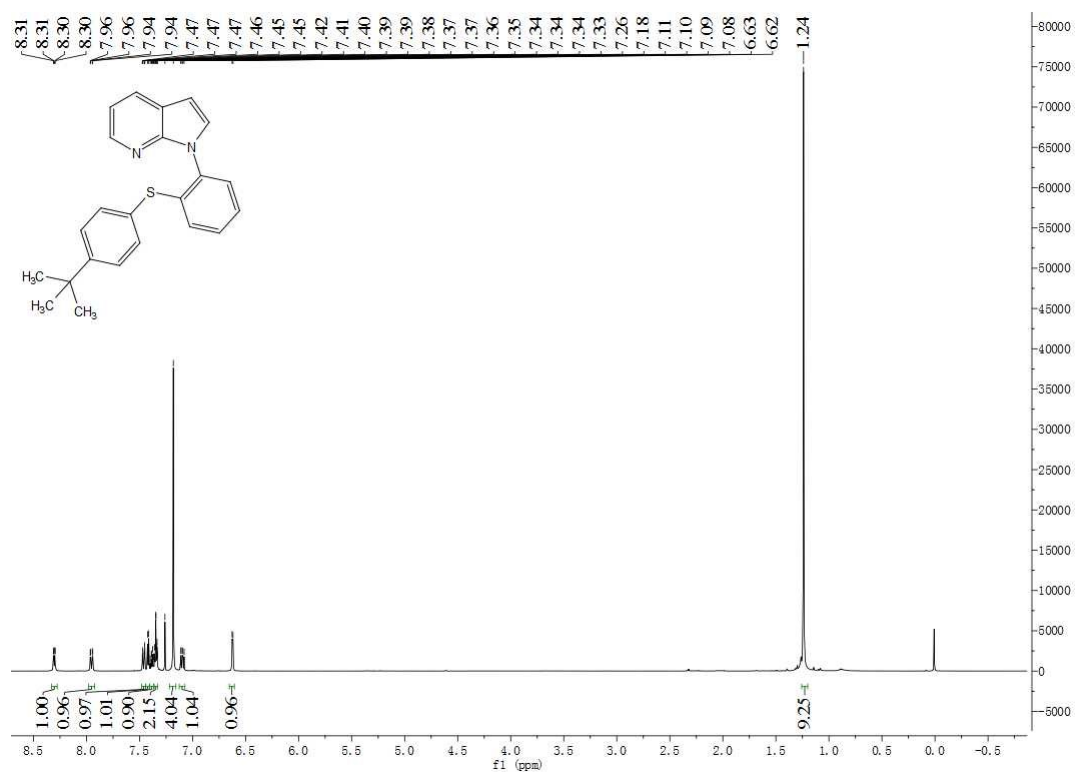

**<sup>13</sup>C NMR spectrum of 3x in CDCl<sub>3</sub>**

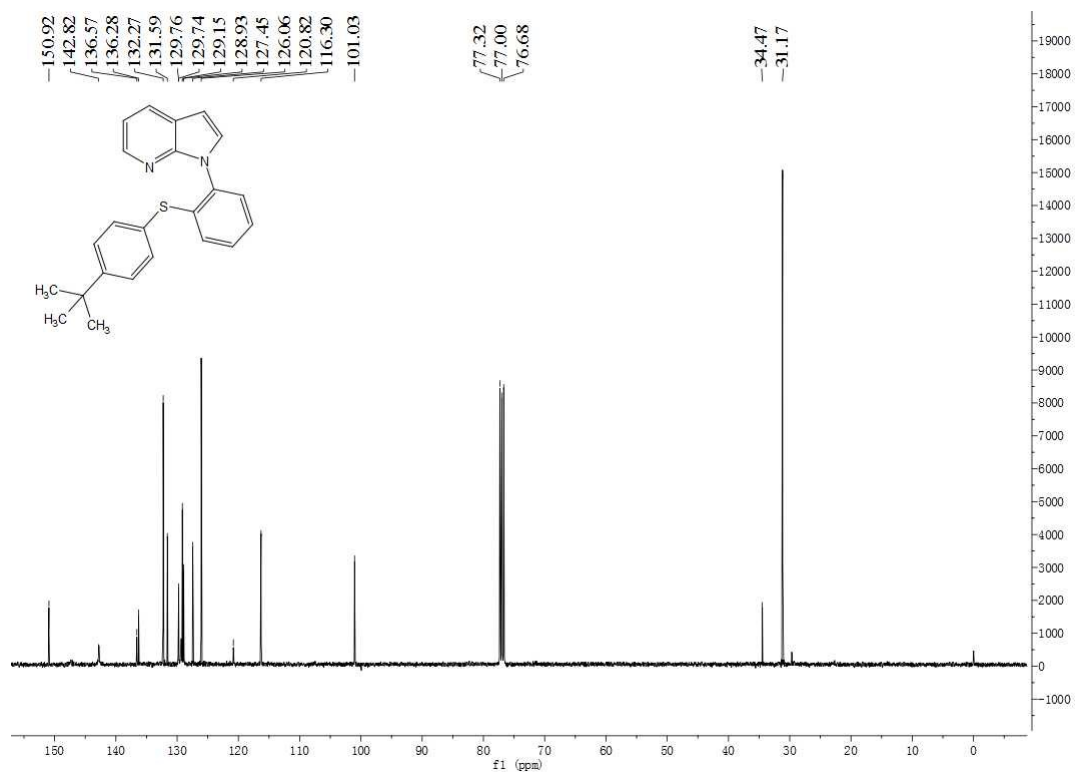

**<sup>1</sup>H NMR spectrum of 3y in CDCl<sub>3</sub>**

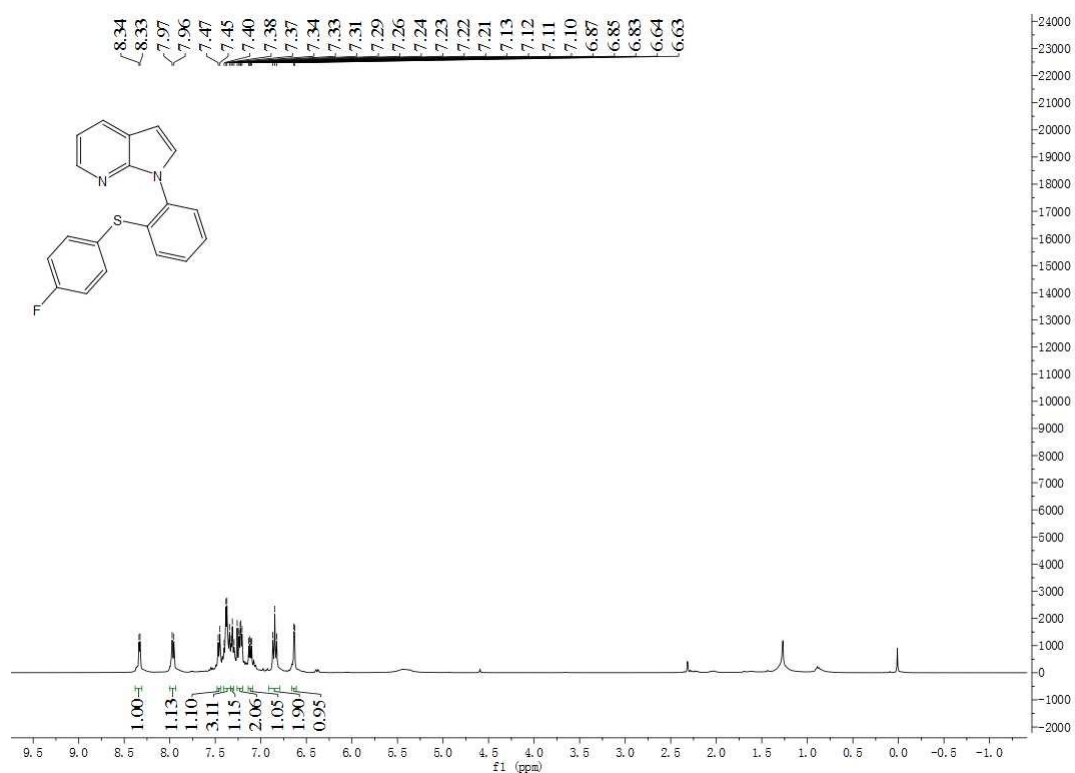

**<sup>13</sup>C NMR spectrum of 3y in CDCl<sub>3</sub>**

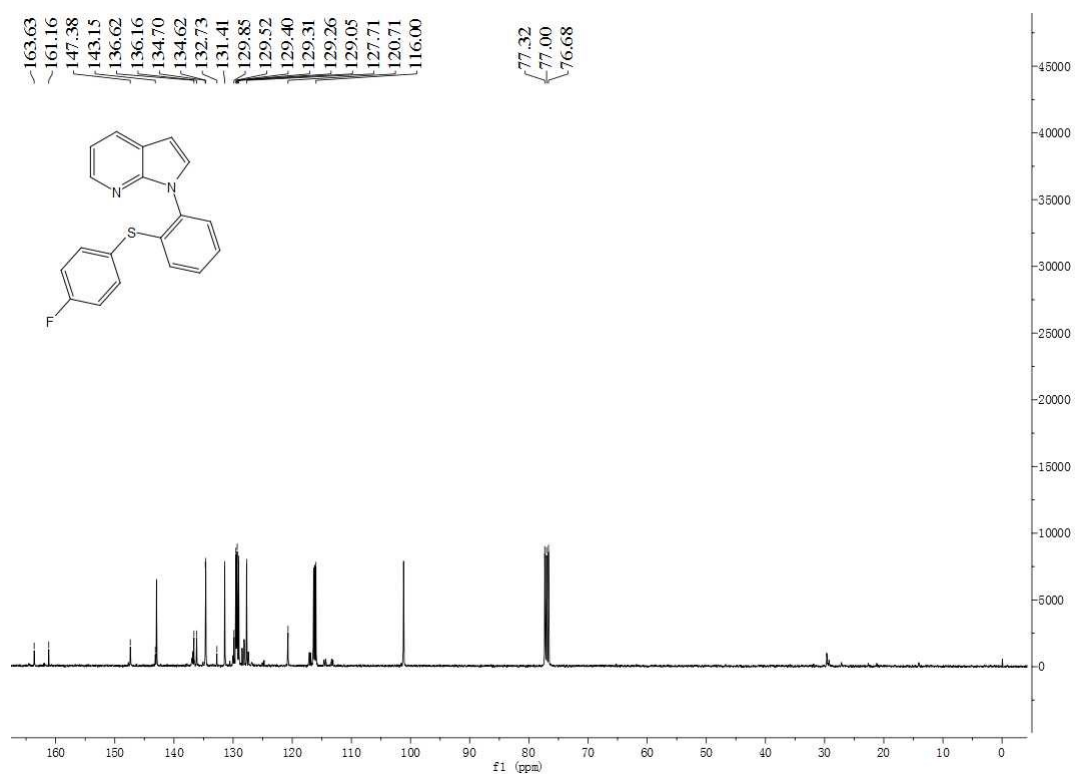

**$^{19}\text{F}$  NMR spectrum of 3y in  $\text{CDCl}_3$**

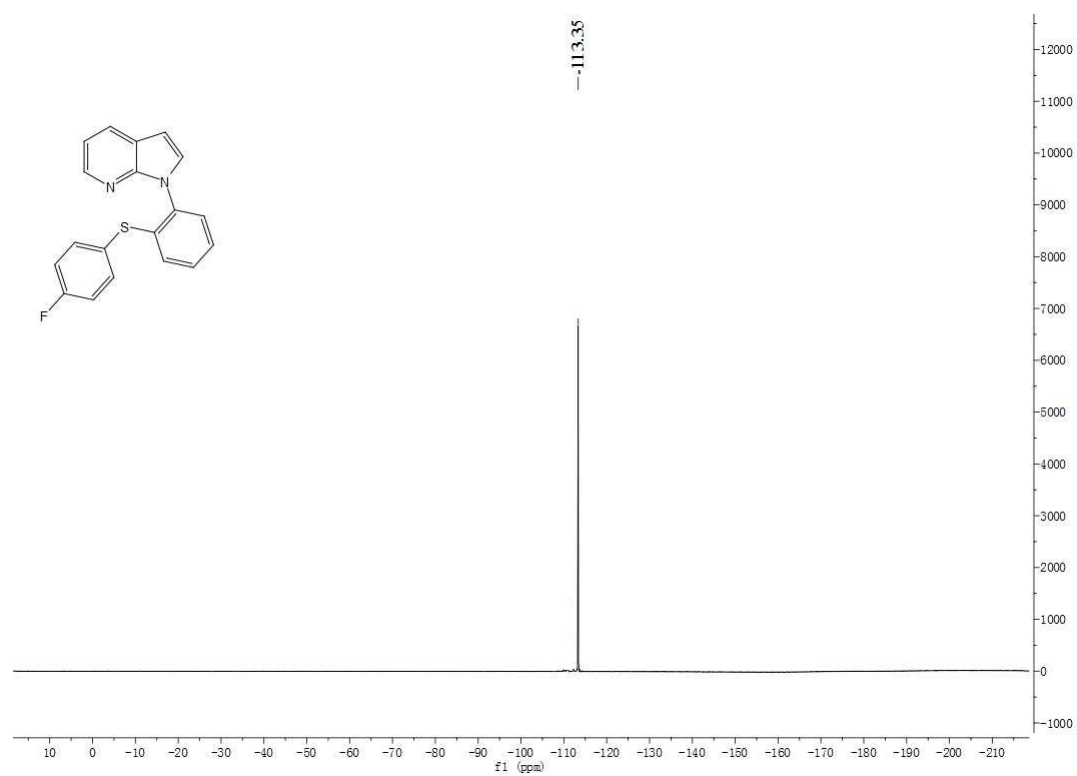

**<sup>1</sup>H NMR spectrum of 3z in CDCl<sub>3</sub>**

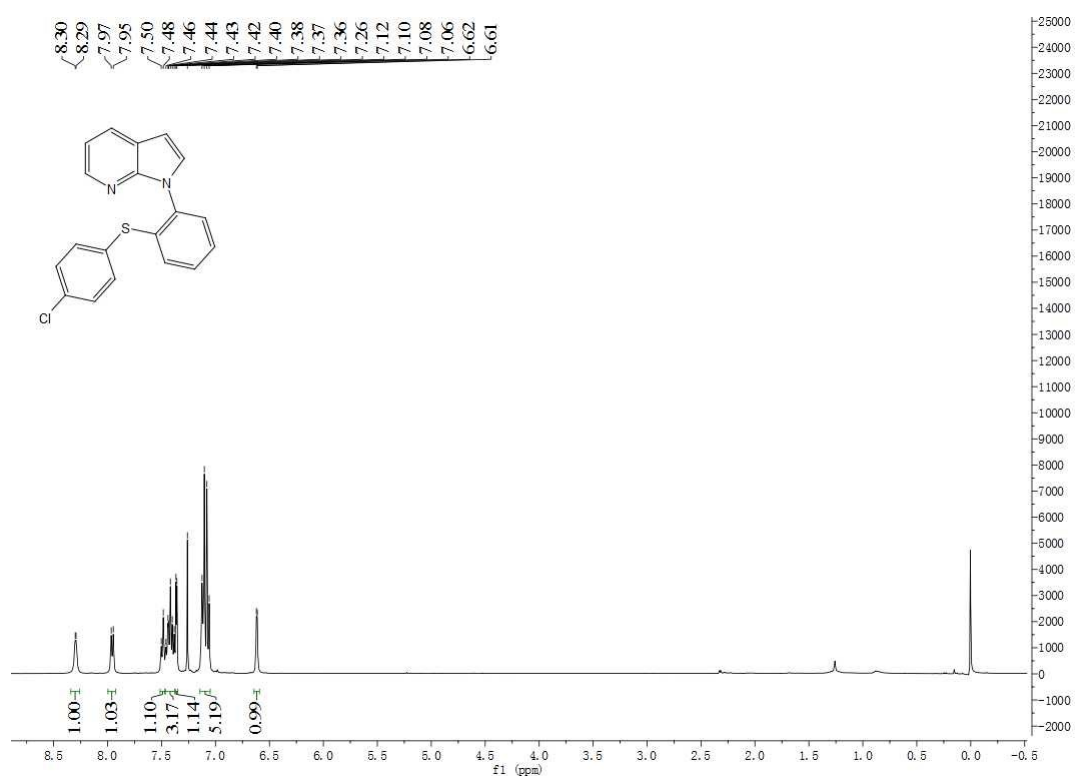

**<sup>13</sup>C NMR spectrum of 3z in CDCl<sub>3</sub>**

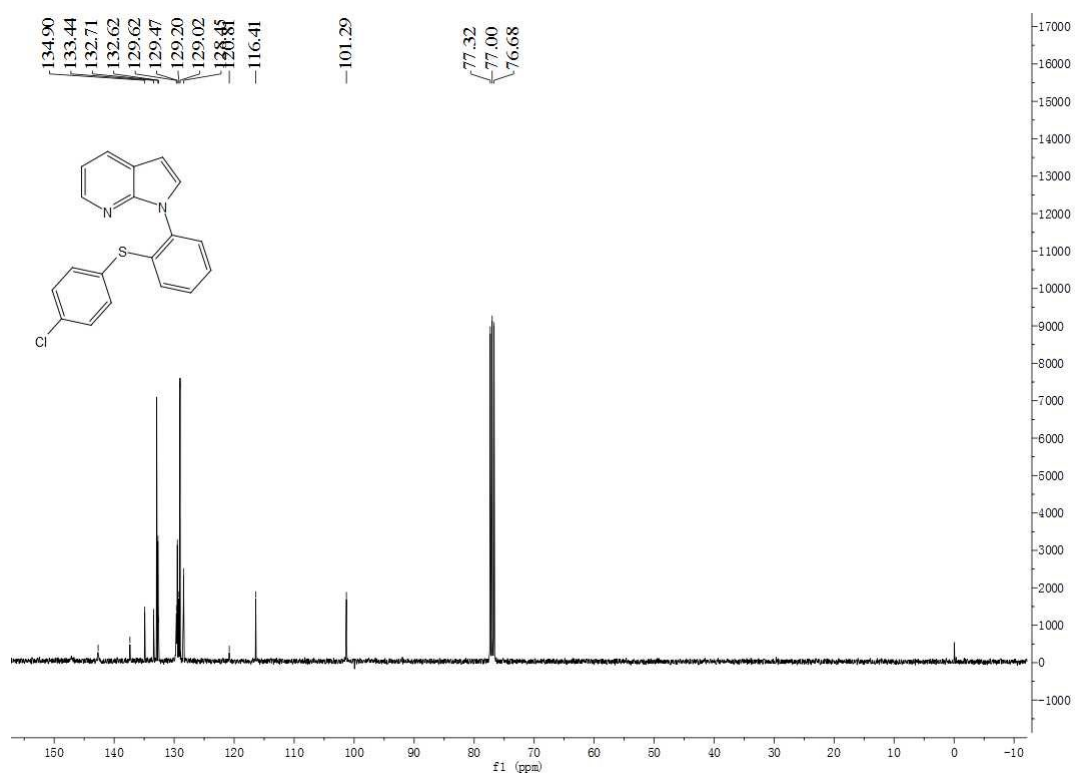

**<sup>1</sup>H NMR spectrum of 3aa in CDCl<sub>3</sub>**

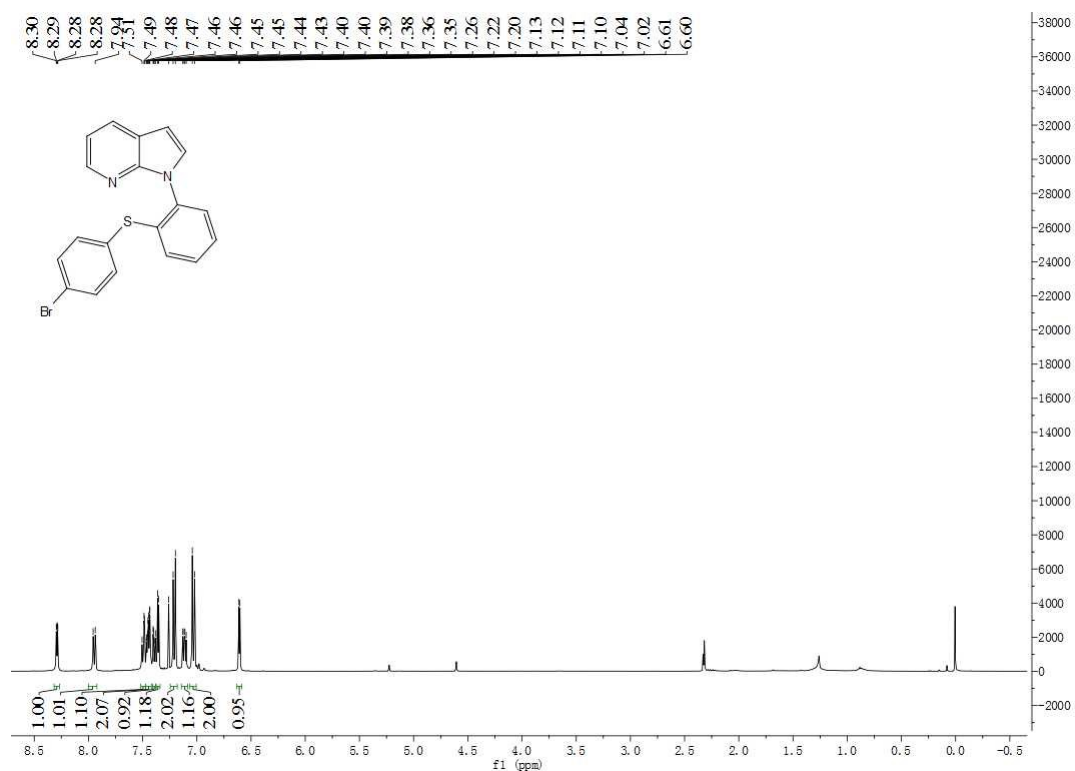

**<sup>13</sup>C NMR spectrum of 3aa in CDCl<sub>3</sub>**

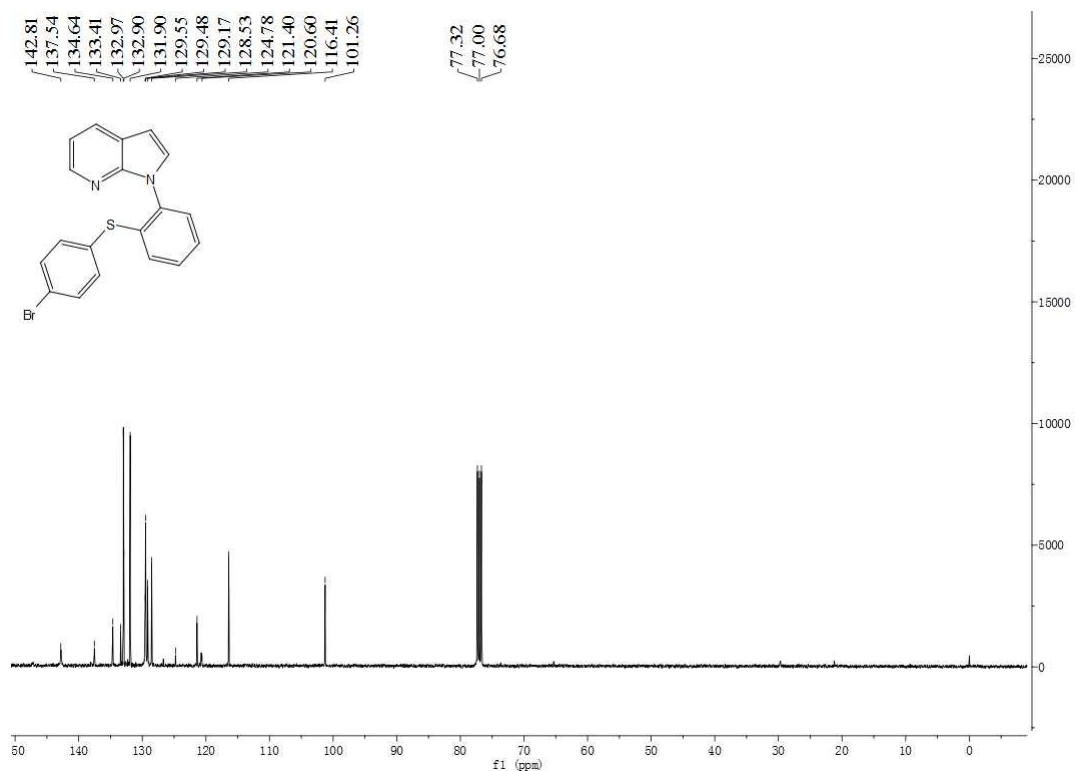

**<sup>1</sup>H NMR spectrum of 3ab in CDCl<sub>3</sub>**

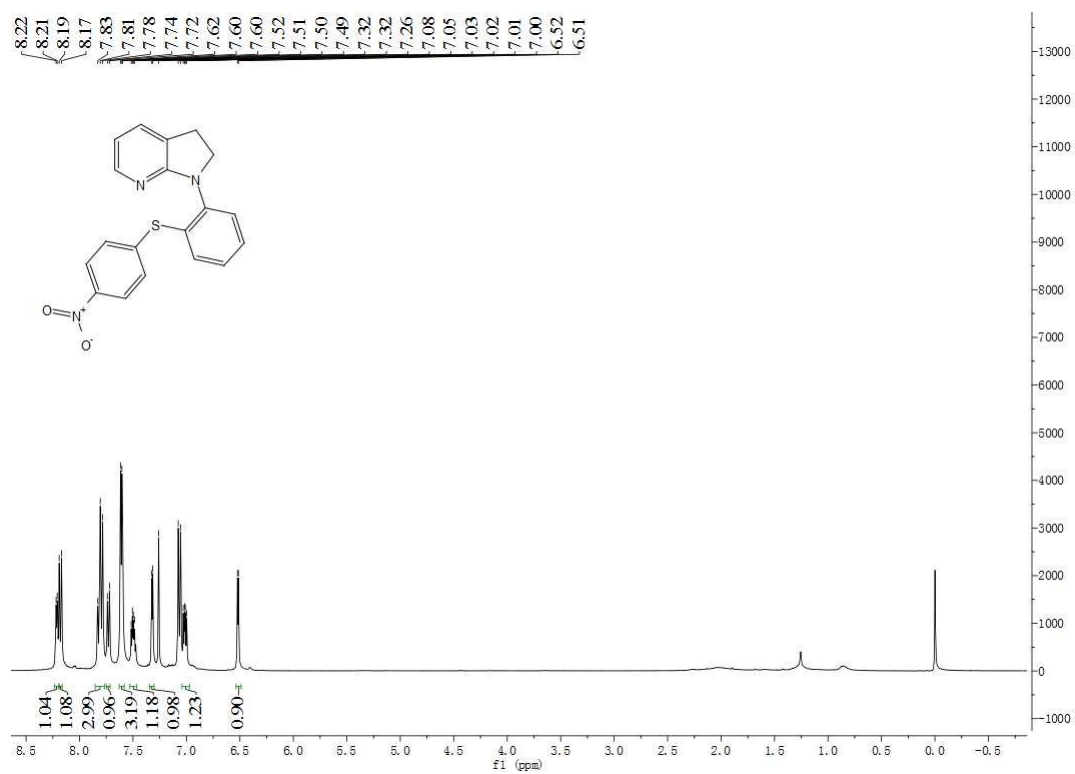

**<sup>13</sup>C NMR spectrum of 3ab in CDCl<sub>3</sub>**

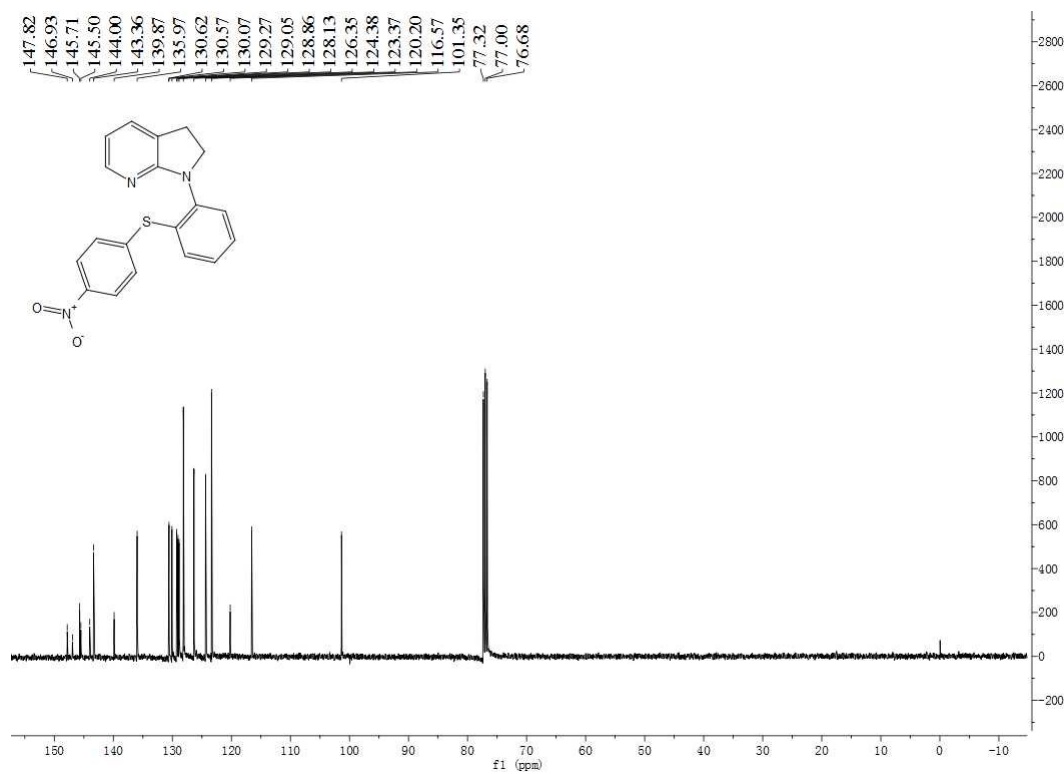

**<sup>1</sup>H NMR spectrum of 3ac in CDCl<sub>3</sub>**

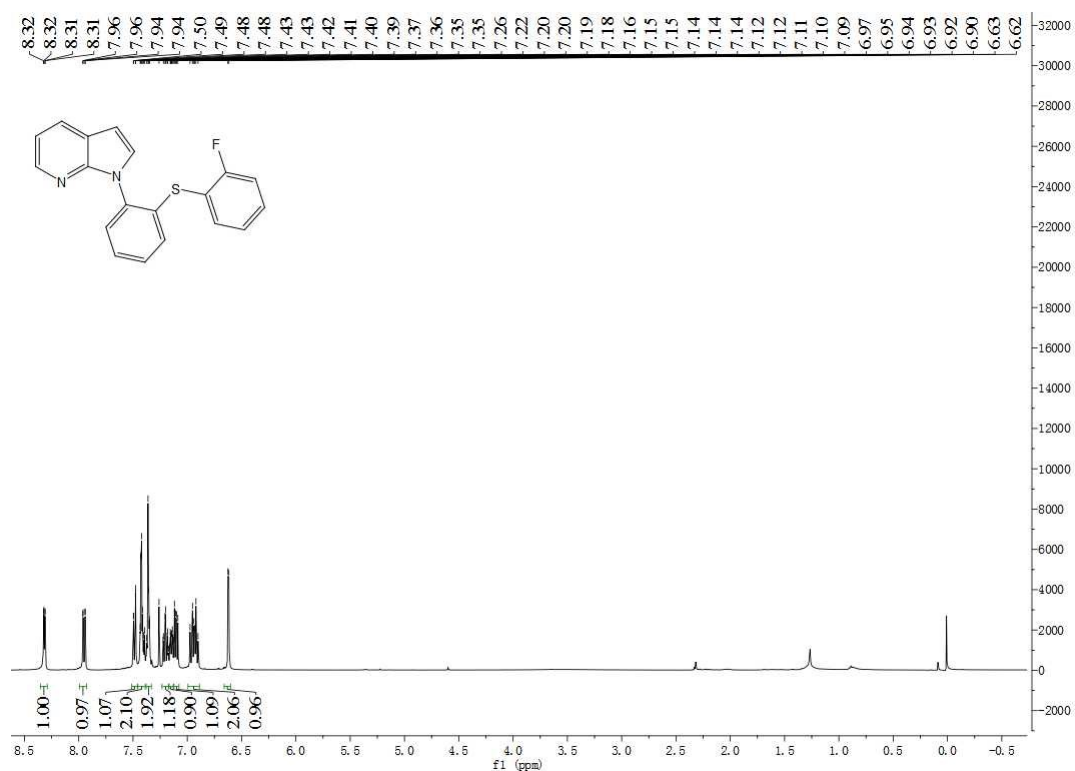

**<sup>13</sup>C NMR spectrum of 3ac in CDCl<sub>3</sub>**

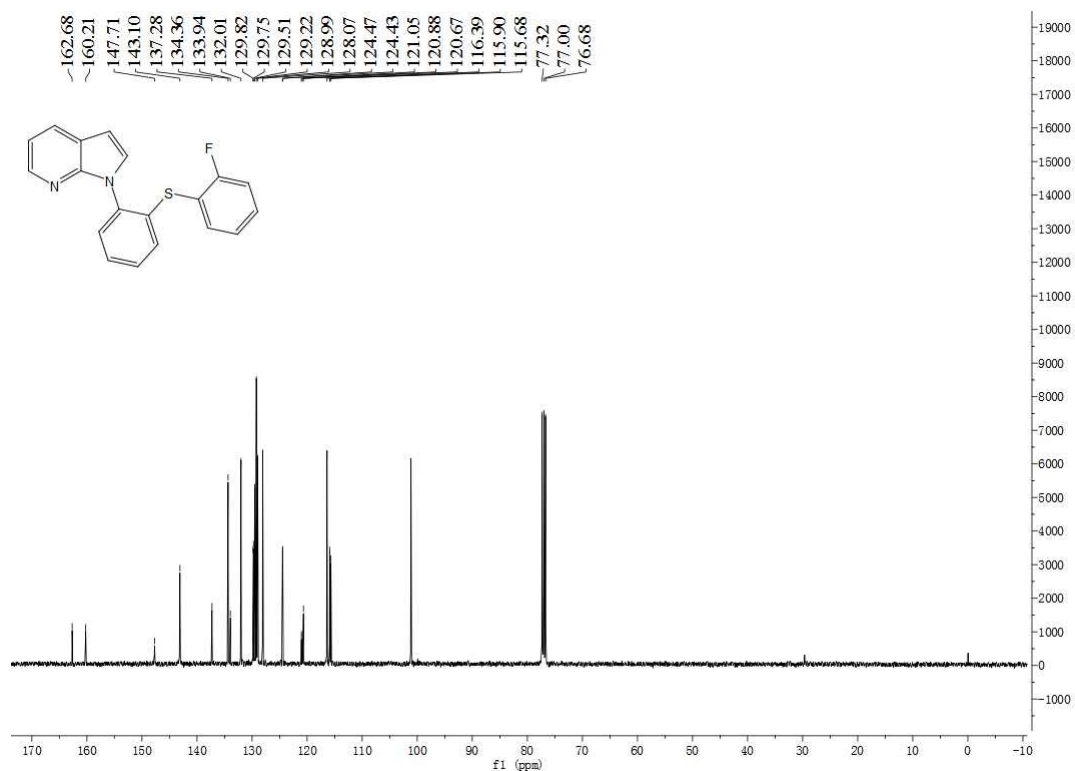

**<sup>19</sup>F NMR spectrum of 3ac in CDCl<sub>3</sub>**

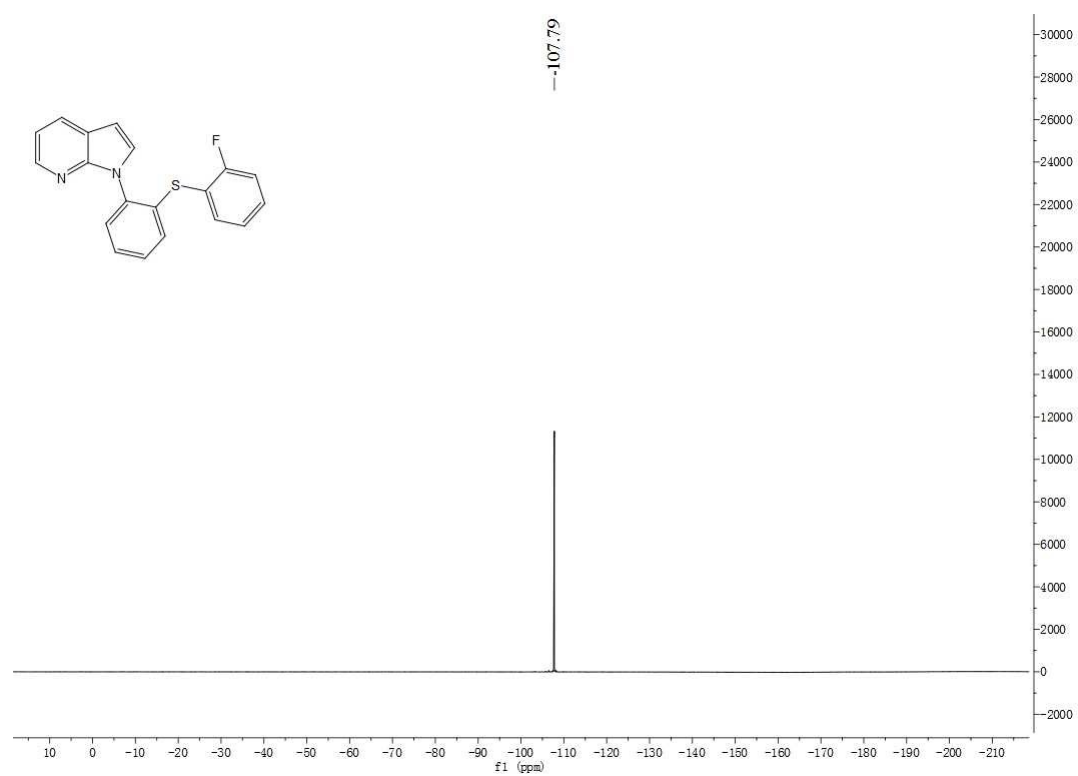

**<sup>1</sup>H NMR spectrum of 3ad in CDCl<sub>3</sub>**

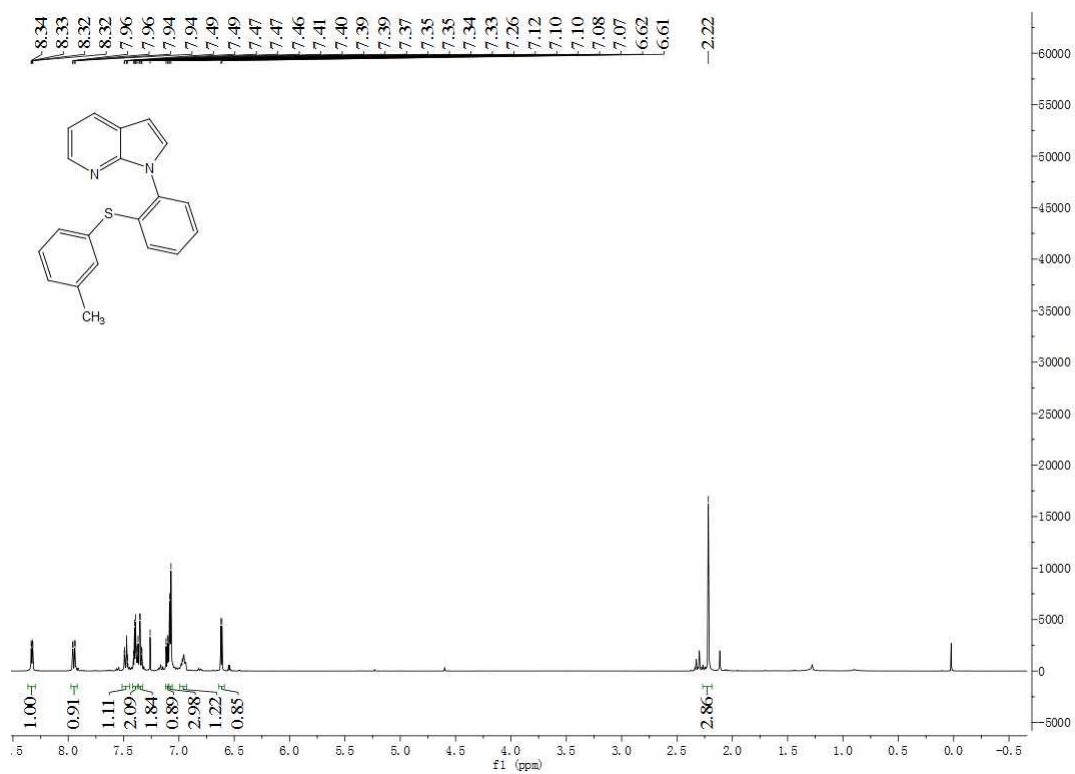

**<sup>13</sup>C NMR spectrum of 3ad in CDCl<sub>3</sub>**

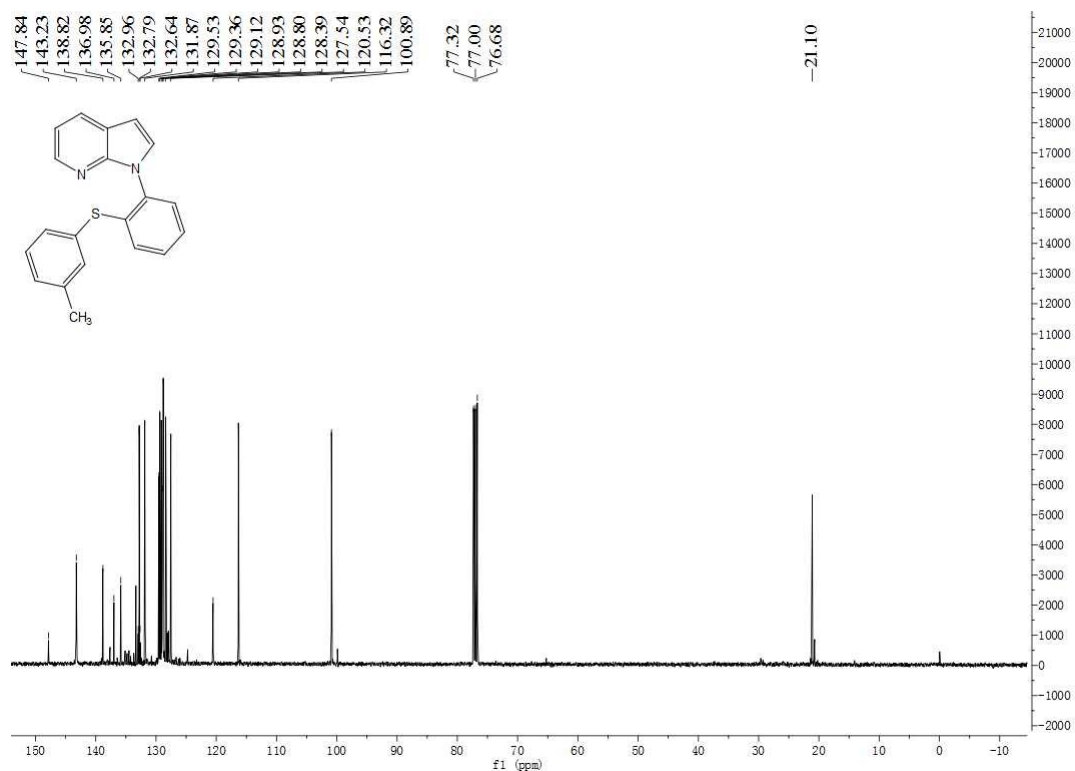

**<sup>1</sup>H NMR spectrum of 3ae in CDCl<sub>3</sub>**

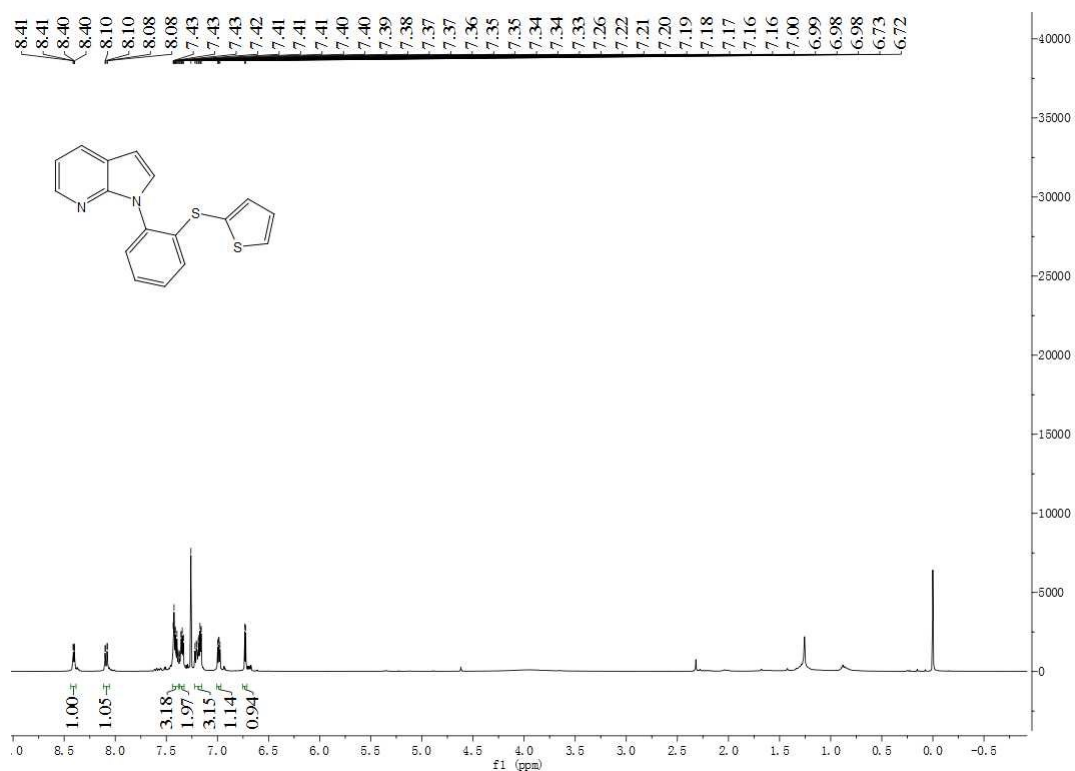

**$^{13}\text{C}$  NMR spectrum of 3ae in  $\text{CDCl}_3$**

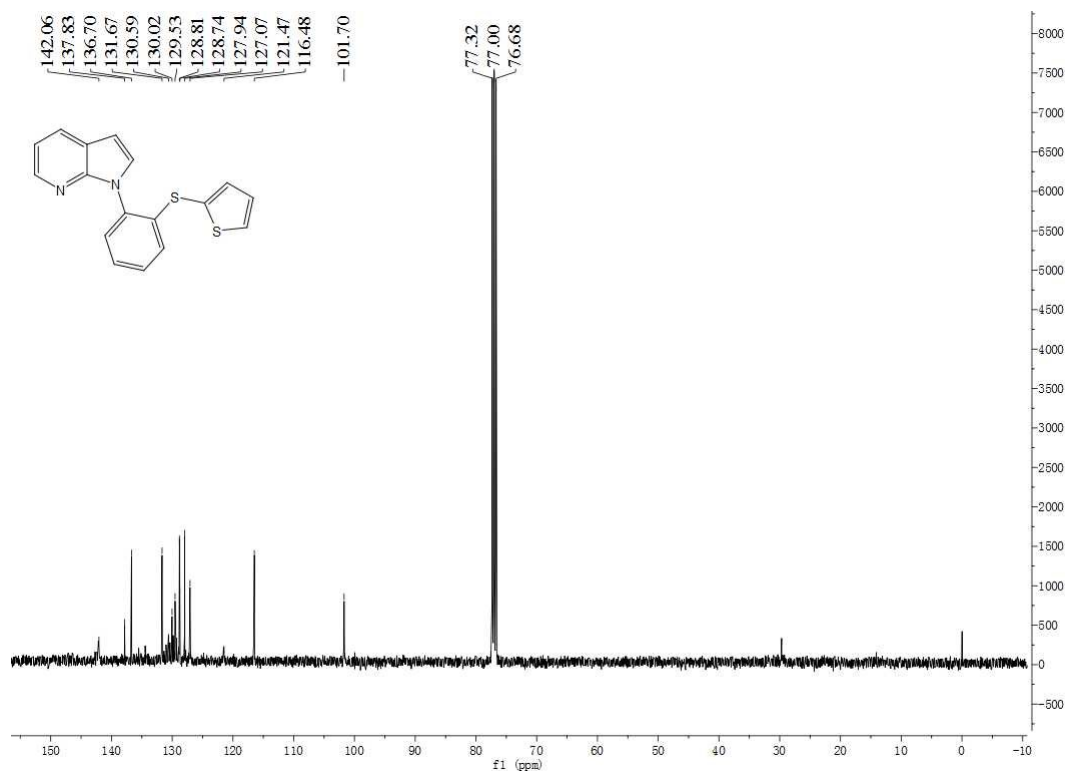

**<sup>1</sup>H NMR spectrum of 3af in CDCl<sub>3</sub>**

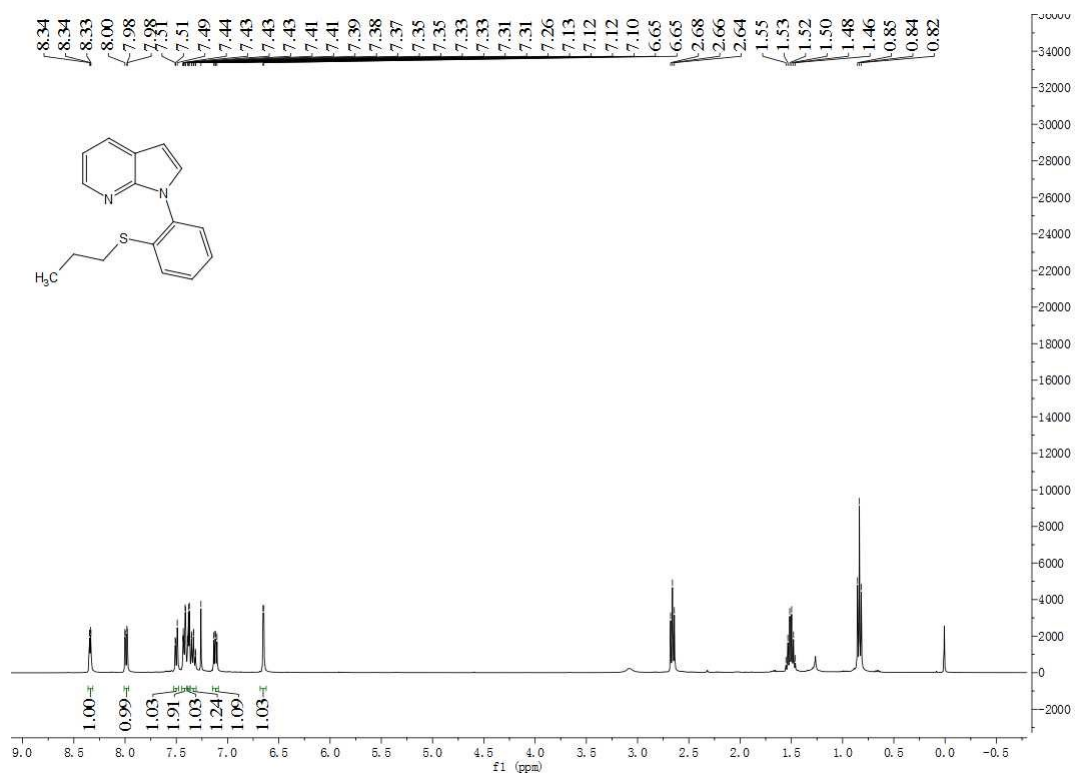

**<sup>13</sup>C NMR spectrum of 3af in CDCl<sub>3</sub>**

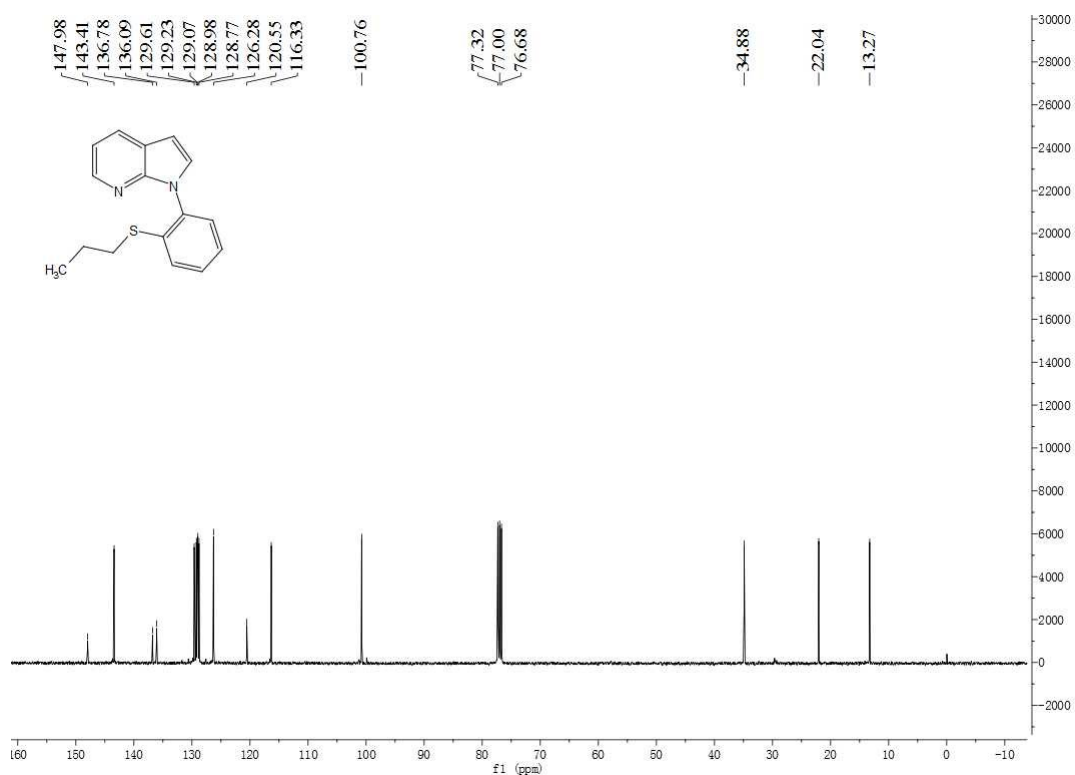

**<sup>1</sup>H NMR spectrum of 3ag in CDCl<sub>3</sub>**

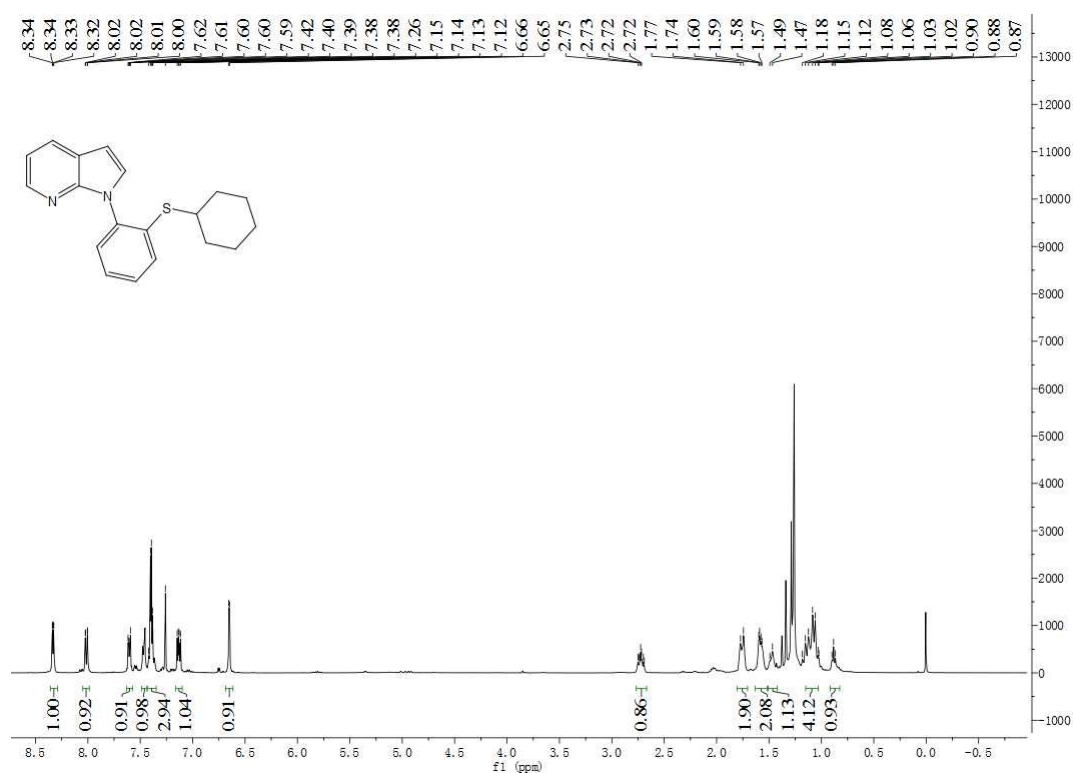

**<sup>13</sup>C NMR spectrum of 3ag in CDCl<sub>3</sub>**

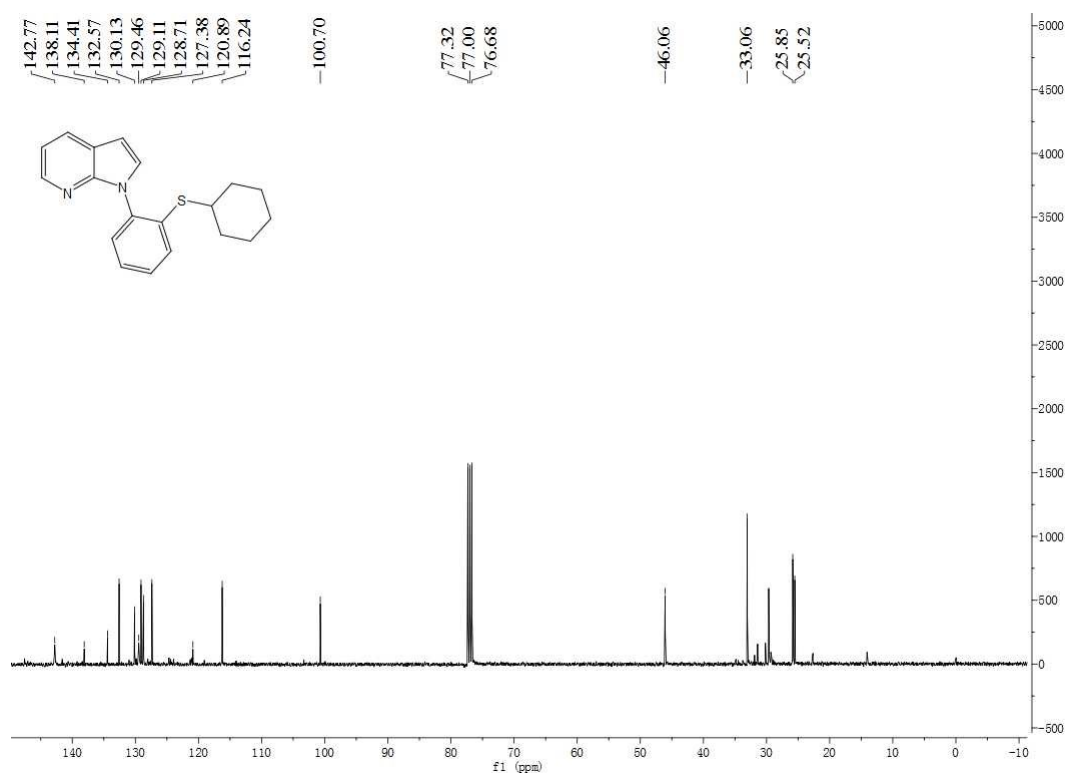

**<sup>1</sup>H NMR spectrum of 3ah in CDCl<sub>3</sub>**

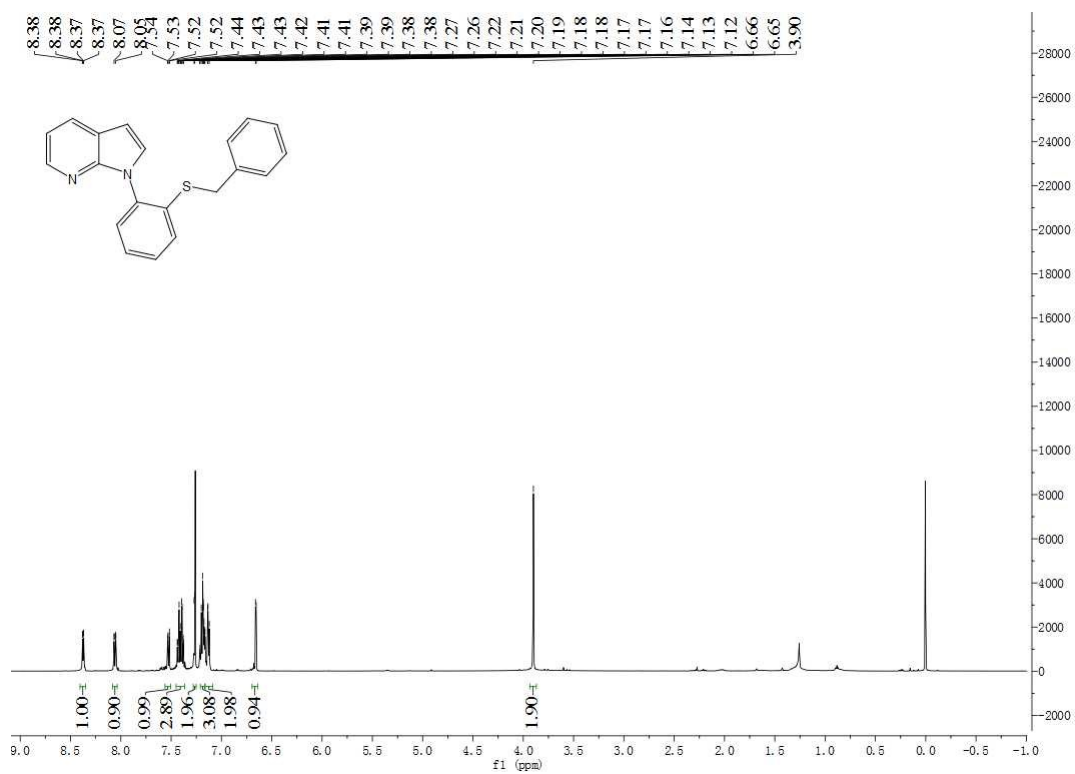

**<sup>13</sup>C NMR spectrum of 3ah in CDCl<sub>3</sub>**

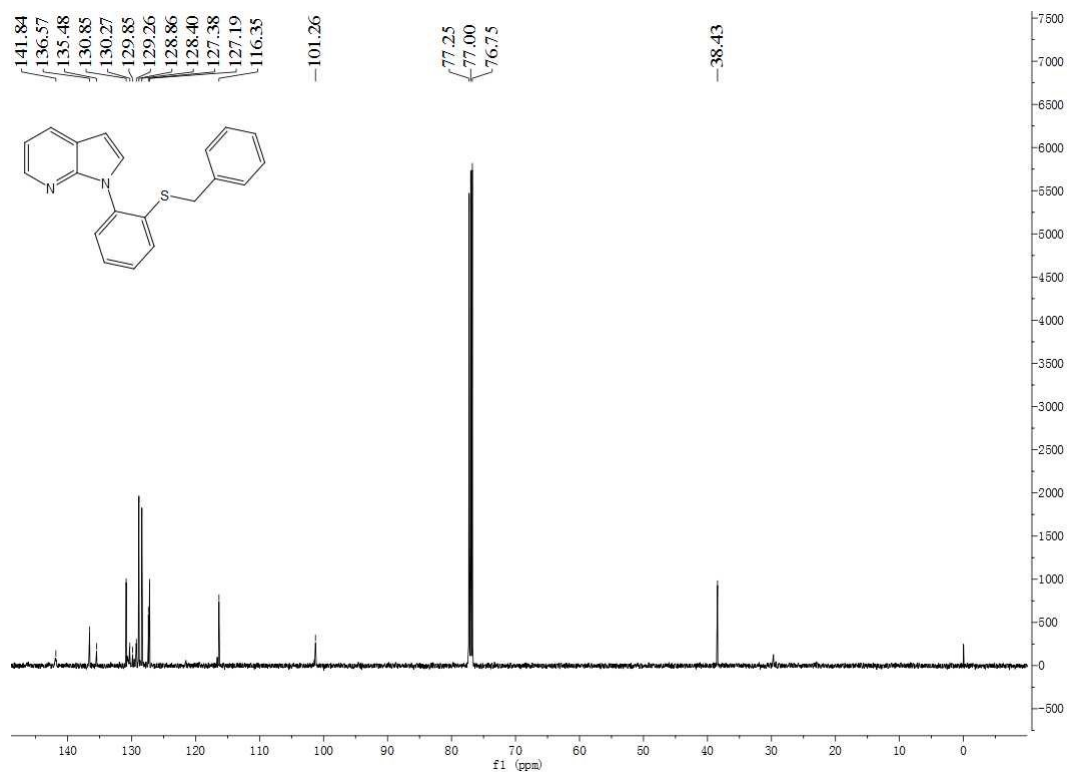

**<sup>1</sup>H NMR spectrum of 3ai in CDCl<sub>3</sub>**

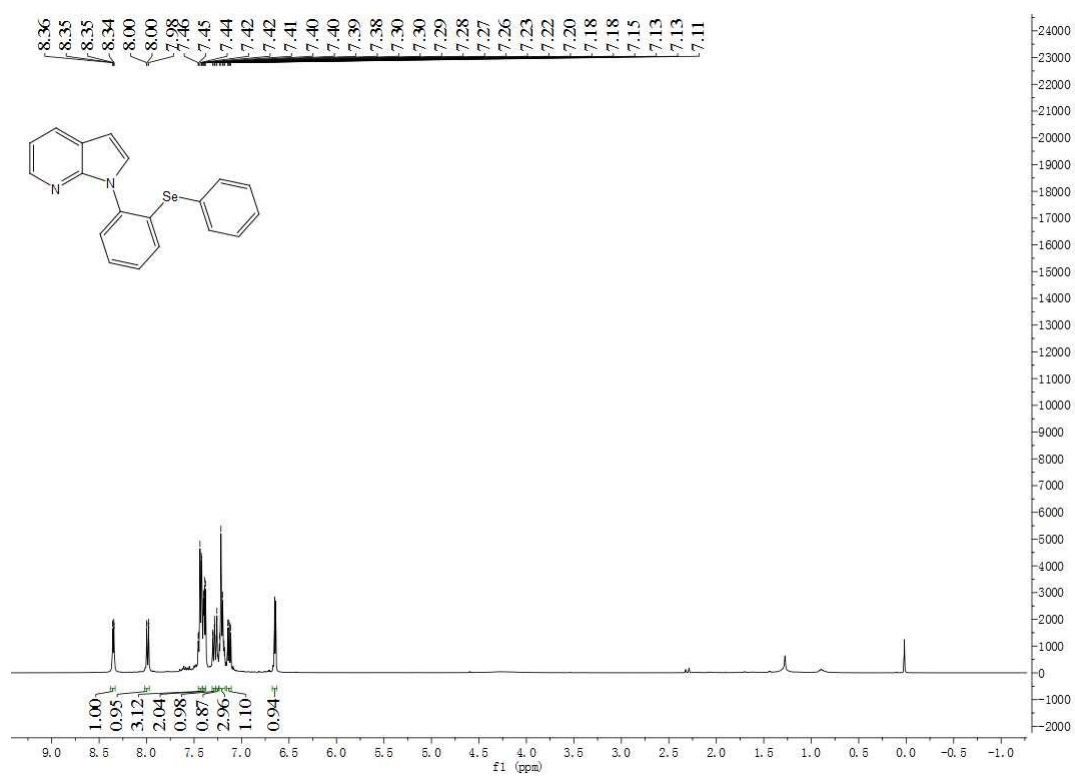

**<sup>13</sup>C NMR spectrum of 3ai in CDCl<sub>3</sub>**

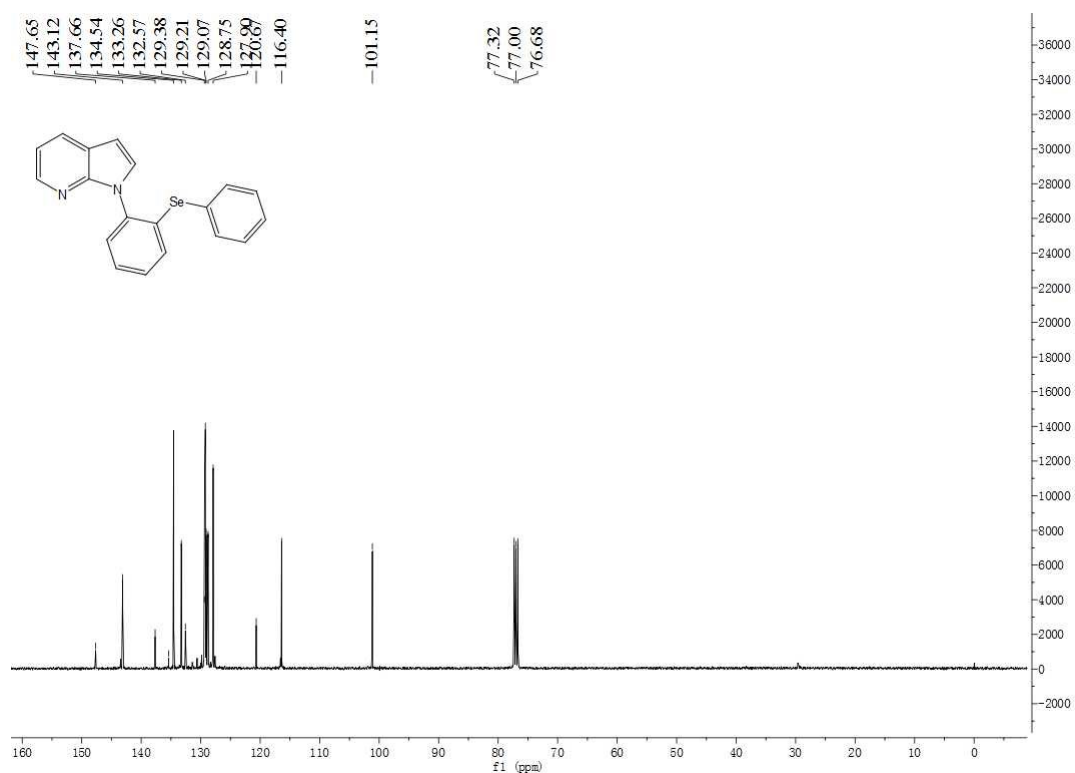

**<sup>1</sup>H NMR spectrum of 3ai in CDCl<sub>3</sub>**

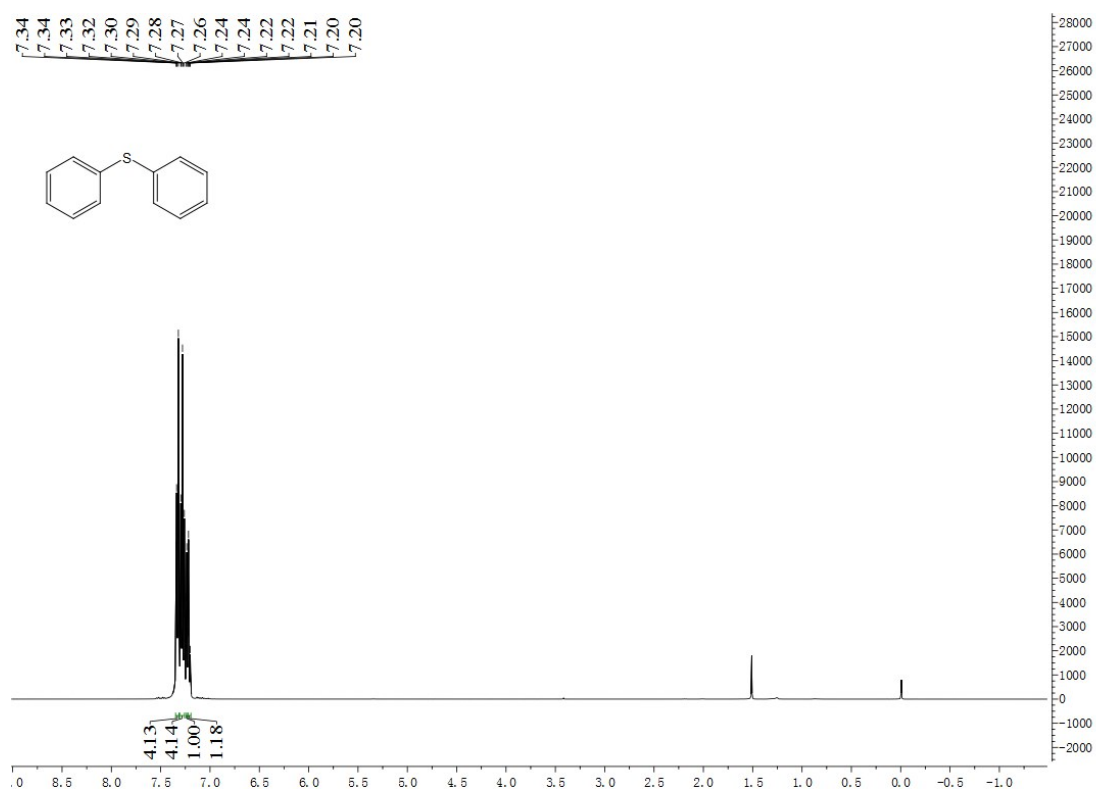

**<sup>13</sup>C NMR spectrum of 3ai in CDCl<sub>3</sub>**

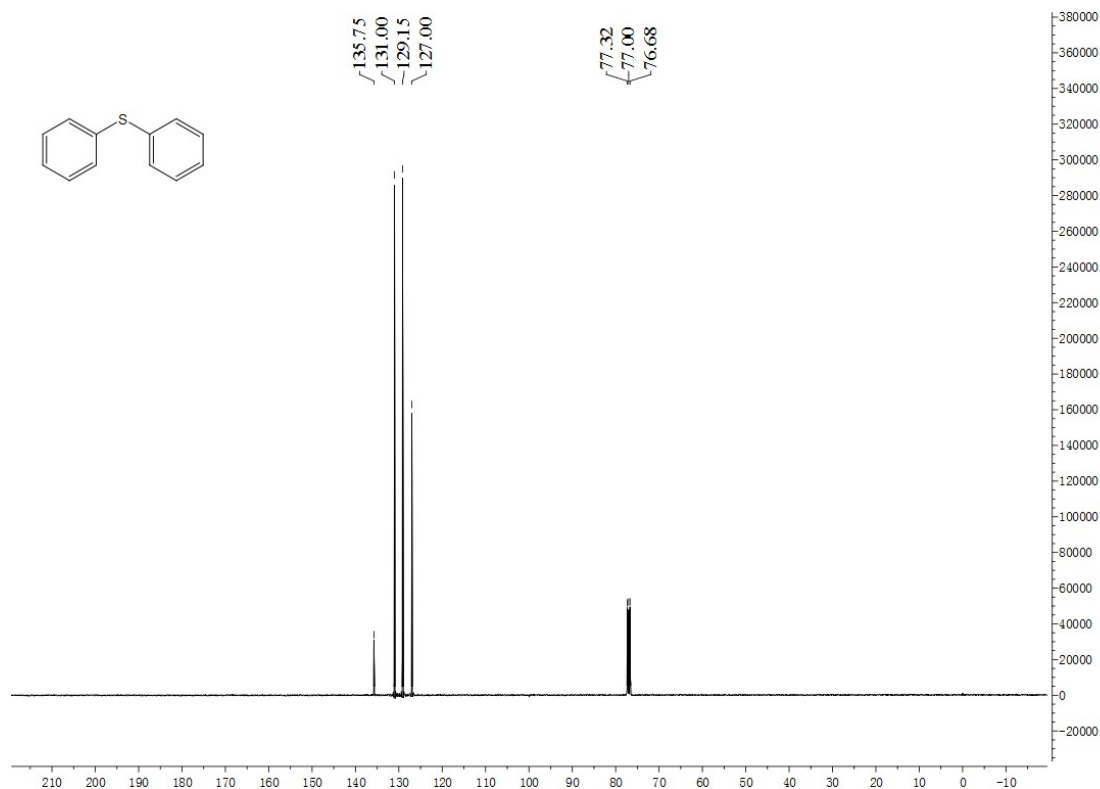

Supplement: d1ob00106j1.pdf [file d1ob00106j1.pdf]
